# Supplementary material for: Proximity-dependent proteomics of the Chlamydia trachomatis inclusion membrane reveals functional interactions with endoplasmic reticulum exit sites
Source: PLoS Pathog. 2019 Apr 3;15(4):e1007698. doi: 10.1371/journal.ppat.1007698 (PMC6464245; doi:10.1371/journal.ppat.1007698)
Supplement: S1 Table — (XLSX) [file ppat.1007698.s014.xlsx]

## Sheet: Proteomics (Human)
Protein	Uniprot_ID	Uniprot entry	Protein names	Found#	APEX 8 hr P value	APEX 16 hr P value	APEX 24 hr P value	Aeberhard P value (0 = p < 0.01)	Mirrashidi MIST.score (1 = perfect score)	Mirrashidi Bait(Inc)	Microscopy (PMID)
PDIA1	P07237	P07237	Protein disulfide-isomerase (PDI) (EC 5.3.4.1) (Cellular thyroid hormone-binding protein) (Prolyl 4-hydroxylase subunit beta) (p55)	3	4.52945e-05	4.52945e-05	4.52945e-05	0	0.700317	CT058_57-367	19343202
ASPH	Q12797	Q12797	Aspartyl/asparaginyl beta-hydroxylase (EC 1.14.11.16) (Aspartate beta-hydroxylase) (ASP beta-hydroxylase) (Peptide-aspartate beta-dioxygenase)	3	4.52945e-05	0.00202948	0.022871	0	0.724311	CT005
MYPT1	O14974	O14974	Protein phosphatase 1 regulatory subunit 12A (Myosin phosphatase-targeting subunit 1) (Myosin phosphatase target subunit 1) (Protein phosphatase myosin-binding subunit)	3	0.000964813	4.52945e-05	4.52945e-05	0	0.951487	CT228	23727243
LRRF1	Q32MZ4	Q32MZ4	Leucine-rich repeat flightless-interacting protein 1 (LRR FLII-interacting protein 1) (GC-binding factor 2) (TAR RNA-interacting protein)	3	0.000964813	0.00588549	0.00293561	0	0.946039	CT226
1433B	P31946	P31946	14-3-3 protein beta/alpha (Protein 1054) (Protein kinase C inhibitor protein 1) (KCIP-1) [Cleaved into: 14-3-3 protein beta/alpha, N-terminally processed]	3	0.00571459	4.52945e-05	4.52945e-05	0	0.839896	CT006	11260479
LRC59	Q96AG4	Q96AG4	Leucine-rich repeat-containing protein 59 (Ribosome-binding protein p34) (p34)	3	0.022871	4.52945e-05	4.52945e-05	0	0.837073	CT005, INCE_CHLTR_MS
VAPB	O95292	O95292	Vesicle-associated membrane protein-associated protein B/C (VAMP-B/VAMP-C) (VAMP-associated protein B/C) (VAP-B/VAP-C)	3		4.52945e-05	4.52945e-05	0	0.759707	CT005	21731489
VAPA	Q9P0L0	Q9P0L0	Vesicle-associated membrane protein-associated protein A (VAMP-A) (VAMP-associated protein A) (VAP-A) (33 kDa VAMP-associated protein) (VAP-33)	3		4.52945e-05	4.52945e-05	0	0.889609	CT005, CT556	21731489
TMOD3	Q9NYL9	Q9NYL9	Tropomodulin-3 (Ubiquitous tropomodulin) (U-Tmod)	3		4.52945e-05	4.52945e-05	0	0.940474	CT226
SNX1	Q13596	Q13596	Sorting nexin-1	3		0.000964813	4.52945e-05	0	0.996193	INCE_CHLTR_101-132, INCE_CHLTR_MS	26042774
EPN4	Q14677	Q14677	Clathrin interactor 1 (Clathrin-interacting protein localized in the trans-Golgi region) (Clint) (Enthoprotin) (Epsin-4) (Epsin-related protein) (EpsinR)	3		0.000964813	4.52945e-05	0.05	0.675899	CT223_84-270
STX7	O15400	O15400	Syntaxin-7	3		0.00571459	4.52945e-05	0	0.931272	INCE_CHLTR_MS	26042774
BAP31	P51572	P51572	B-cell receptor-associated protein 31 (BCR-associated protein 31) (Bap31) (6C6-AG tumor-associated antigen) (Protein CDM) (p28)	3		0.022871	4.52945e-05	0	0.906145	CT565b_1-144
EGFR	P00533	P00533	Epidermal growth factor receptor (EC 2.7.10.1) (Proto-oncogene c-ErbB-1) (Receptor tyrosine-protein kinase erbB-1)	3			4.52945e-05	0	0.878096	INCE_CHLTR_MS	25471819
RTN4	Q9NQC3	Q9NQC3	Reticulon-4 (Foocen) (Neurite outgrowth inhibitor) (Nogo protein) (Neuroendocrine-specific protein) (NSP) (Neuroendocrine-specific protein C homolog) (RTN-x) (Reticulon-5)	3			0.000964813	0	0.768306	INCF_CHLTR_MS, CT449_17-110	22901061
1433F	Q04917	Q04917	14-3-3 protein eta (Protein AS1)	3			0.00571459	0	0.892778	CT006	25920978
CALX	P27824	P27824	Calnexin (IP90) (Major histocompatibility complex class I antigen-binding protein p88) (p90)	2	4.52945e-05	2.4505e-05	4.52945e-05	0			18832043
CALR	P27797	P27797	Calreticulin (CRP55) (Calregulin) (Endoplasmic reticulum resident protein 60) (ERp60) (HACBP) (grp60)	2	4.52945e-05	4.52945e-05	4.52945e-05	0			9841902
PGRC1	O00264	O00264	Membrane-associated progesterone receptor component 1 (mPR)	2	4.52945e-05	4.52945e-05	4.52945e-05	0
PRDX4	Q13162	Q13162	Peroxiredoxin-4 (EC 1.11.1.15) (Antioxidant enzyme AOE372) (AOE37-2) (Peroxiredoxin IV) (Prx-IV) (Thioredoxin peroxidase AO372) (Thioredoxin-dependent peroxide reductase A0372)	2	4.52945e-05	4.52945e-05	4.52945e-05	0
NENF	Q9UMX5	Q9UMX5	Neudesin (Cell immortalization-related protein 2) (Neuron-derived neurotrophic factor) (Protein GIG47) (Secreted protein of unknown function) (SPUF protein)	2	4.52945e-05	0.643438	4.52945e-05	0.03
ERP29	P30040	P30040	Endoplasmic reticulum resident protein 29 (ERp29) (Endoplasmic reticulum resident protein 28) (ERp28) (Endoplasmic reticulum resident protein 31) (ERp31)	2	0.000964813	4.52945e-05	4.52945e-05	0
TPM4	P67936	P67936	Tropomyosin alpha-4 chain (TM30p1) (Tropomyosin-4)	2	0.000964813	4.52945e-05	4.52945e-05	0
CKAP4	Q07065	Q07065	Cytoskeleton-associated protein 4 (63-kDa cytoskeleton-linking membrane protein) (Climp-63) (p63)	2	0.000964813	0.00627782	0.000201275		0.700717	CT788_26-166
TCPQ	P50990	P50990	T-complex protein 1 subunit theta (TCP-1-theta) (CCT-theta) (Renal carcinoma antigen NY-REN-15)	2	0.000964813	0.0747595	0.501795	0
ACTN4	O43707	O43707	Alpha-actinin-4 (Non-muscle alpha-actinin 4)	2	0.000964813	0.182648	0.022871	0
ALDOA	P04075	P04075	Fructose-bisphosphate aldolase A (EC 4.1.2.13) (Lung cancer antigen NY-LU-1) (Muscle-type aldolase)	2	0.000964813			0
PRDX2	P32119	P32119	Peroxiredoxin-2 (EC 1.11.1.15) (Natural killer cell-enhancing factor B) (NKEF-B) (PRP) (Thiol-specific antioxidant protein) (TSA) (Thioredoxin peroxidase 1) (Thioredoxin-dependent peroxide reductase 1)	2	0.00377614	0.0747595	0.557128	0
STIP1	P31948	P31948	Stress-induced-phosphoprotein 1 (STI1) (Hsc70/Hsp90-organizing protein) (Hop) (Renal carcinoma antigen NY-REN-11) (Transformation-sensitive protein IEF SSP 3521)	2	0.00411268	0.0004761	3.49582e-06	0
MIA3 (TANGO1)	Q5JRA6	Q5JRA6	Melanoma inhibitory activity protein 3 (C219-reactive peptide) (D320) (Transport and Golgi organization protein 1)	2	0.00571459	4.52945e-05	4.52945e-05	0
PGK1	P00558	P00558	Phosphoglycerate kinase 1 (EC 2.7.2.3) (Cell migration-inducing gene 10 protein) (Primer recognition protein 2) (PRP 2)	2	0.00571459	0.25563	0.557128	0
TPM2	P07951	P07951	Tropomyosin beta chain (Beta-tropomyosin) (Tropomyosin-2)	2	0.00571459	0.501795	0.49561	0
ENPL	P14625	P14625	Endoplasmin (94 kDa glucose-regulated protein) (GRP-94) (Heat shock protein 90 kDa beta member 1) (Tumor rejection antigen 1) (gp96 homolog)	2	0.00571459	0.823177	0.0232998	0
PKM2	P14618	P14618	Pyruvate kinase PKM (EC 2.7.1.40) (Cytosolic thyroid hormone-binding protein) (CTHBP) (Opa-interacting protein 3) (OIP-3) (Pyruvate kinase 2/3) (Pyruvate kinase muscle isozyme) (Thyroid hormone-binding protein 1) (THBP1) (Tumor M2-PK) (p58)	2	0.00571459			0
TKT	P29401	P29401	Transketolase (TK) (EC 2.2.1.1)	2	0.00571459			0
CD44	P16070	P16070	CD44 antigen (CDw44) (Epican) (Extracellular matrix receptor III) (ECMR-III) (GP90 lymphocyte homing/adhesion receptor) (HUTCH-I) (Heparan sulfate proteoglycan) (Hermes antigen) (Hyaluronate receptor) (Phagocytic glycoprotein 1) (PGP-1) (Phagocytic glycoprotein I) (PGP-I) (CD antigen CD44)	2	0.022871	4.52945e-05	0.000964813	0
1433T	P27348	P27348	14-3-3 protein theta (14-3-3 protein T-cell) (14-3-3 protein tau) (Protein HS1)	2	0.022871	0.000158705	4.52945e-05	0			25920978
1433S	P31947	P31947	14-3-3 protein sigma (Epithelial cell marker protein 1) (Stratifin)	2	0.022871	0.000964813	4.52945e-05	0
BASI	P35613	P35613	Basigin (5F7) (Collagenase stimulatory factor) (Extracellular matrix metalloproteinase inducer) (EMMPRIN) (Leukocyte activation antigen M6) (OK blood group antigen) (Tumor cell-derived collagenase stimulatory factor) (TCSF) (CD antigen CD147)	2	0.022871		0.00571459	0
NFXL1	Q6ZNB6	Q6ZNB6	NF-X1-type zinc finger protein NFXL1 (Ovarian zinc finger protein) (hOZFP)	2	0.022871		0.022871	0.01
ALDOC	P09972	P09972	Fructose-bisphosphate aldolase C (EC 4.1.2.13) (Brain-type aldolase)	2	0.022871			0.03
PSB1	P20618	P20618	Proteasome subunit beta type-1 (EC 3.4.25.1) (Macropain subunit C5) (Multicatalytic endopeptidase complex subunit C5) (Proteasome component C5) (Proteasome gamma chain)	2	0.022871			0.03
TPM3	P06753	P06753	Tropomyosin alpha-3 chain (Gamma-tropomyosin) (Tropomyosin-3) (Tropomyosin-5) (hTM5)	2	0.0411048	0.00138344	3.60677e-07	0
GRP78	P11021	P11021	78 kDa glucose-regulated protein (GRP-78) (Endoplasmic reticulum lumenal Ca(2+)-binding protein grp78) (Heat shock 70 kDa protein 5) (Immunoglobulin heavy chain-binding protein) (BiP)	2	0.0432265	0.128323	0.0747595	0			18832043
CALU	O43852	O43852	Calumenin (Crocalbin) (IEF SSP 9302)	2	0.0501346	0.0646813	0.0276709	0
GLU2B	P14314	P14314	Glucosidase 2 subunit beta (80K-H protein) (Glucosidase II subunit beta) (Protein kinase C substrate 60.1 kDa protein heavy chain) (PKCSH)	2	0.0747595	4.52945e-05	0.000497926	0
VINC	P18206	P18206	Vinculin (Metavinculin) (MV)	2	0.200221	0.0747595	4.52945e-05	0
S10A4	P26447	P26447	Protein S100-A4 (Calvasculin) (Metastasin) (Placental calcium-binding protein) (Protein Mts1) (S100 calcium-binding protein A4)	2	0.305814	0.0130907	0.000409044	0.03
PDIA3	P30101	P30101	Protein disulfide-isomerase A3 (EC 5.3.4.1) (58 kDa glucose-regulated protein) (58 kDa microsomal protein) (p58) (Disulfide isomerase ER-60) (Endoplasmic reticulum resident protein 57) (ER protein 57) (ERp57) (Endoplasmic reticulum resident protein 60) (ER protein 60) (ERp60)	2	0.36836	0.0259825	0.224193	0			18832043
BASP1	P80723	P80723	Brain acid soluble protein 1 (22 kDa neuronal tissue-enriched acidic protein) (Neuronal axonal membrane protein NAP-22)	2	0.384731	5.09964e-05	9.02966e-07	0
HSPB1	P04792	P04792	Heat shock protein beta-1 (HspB1) (28 kDa heat shock protein) (Estrogen-regulated 24 kDa protein) (Heat shock 27 kDa protein) (HSP 27) (Stress-responsive protein 27) (SRP27)	2	0.391393	0.0483897	0.0141529	0.01			26042774
TPIS	P60174	P60174	Triosephosphate isomerase (TIM) (EC 5.3.1.1) (Triose-phosphate isomerase)	2	0.414203	0.135979	0.0119309	0
YBOX1	P67809	P67809	Nuclease-sensitive element-binding protein 1 (CCAAT-binding transcription factor I subunit A) (CBF-A) (DNA-binding protein B) (DBPB) (Enhancer factor I subunit A) (EFI-A) (Y-box transcription factor) (Y-box-binding protein 1) (YB-1)	2	0.501795	0.000661374	6.28052e-05	0.01
CAPR1	Q14444	Q14444	Caprin-1 (Cell cycle-associated protein 1) (Cytoplasmic activation- and proliferation-associated protein 1) (GPI-anchored membrane protein 1) (GPI-anchored protein p137) (GPI-p137) (p137GPI) (Membrane component chromosome 11 surface marker 1) (RNA granule protein 105)	2	0.692336	0.726974	0.0165069	0
RRBP1	Q9P2E9	Q9P2E9	Ribosome-binding protein 1 (180 kDa ribosome receptor homolog) (RRp) (ES/130-related protein) (Ribosome receptor protein)	2	0.814642	0.047134	0.0398819		0.904055	CT223, CT223_84-270
STIM1	Q13586	Q13586	Stromal interaction molecule 1	2		4.52945e-05	4.52945e-05	0			25915399
DCTN2	Q13561	Q13561	Dynactin subunit 2 (50 kDa dynein-associated polypeptide) (Dynactin complex 50 kDa subunit) (DCTN-50) (p50 dynamitin)	2		4.52945e-05	4.52945e-05		0.954551	CT192
ICLN	P54105	P54105	Methylosome subunit pICln (Chloride channel, nucleotide sensitive 1A) (Chloride conductance regulatory protein ICln) (I(Cln)) (Chloride ion current inducer protein) (ClCI) (Reticulocyte pICln)	2		4.52945e-05	4.52945e-05		0.541649	CT383b_156-243
EF1D	P29692	P29692	Elongation factor 1-delta (EF-1-delta) (Antigen NY-CO-4)	2		4.52945e-05	4.52945e-05	0
MPRD	P20645	P20645	Cation-dependent mannose-6-phosphate receptor (CD Man-6-P receptor) (CD-MPR) (46 kDa mannose 6-phosphate receptor) (MPR 46)	2		4.52945e-05	4.52945e-05	0
PGRC2	O15173	O15173	Membrane-associated progesterone receptor component 2 (Progesterone membrane-binding protein) (Steroid receptor protein DG6)	2		4.52945e-05	4.52945e-05	0
TFR1	P02786	P02786	Transferrin receptor protein 1 (TR) (TfR) (TfR1) (Trfr) (T9) (p90) (CD antigen CD71) [Cleaved into: Transferrin receptor protein 1, serum form (sTfR)]	2		0.000964813	4.52945e-05	0			14500507
LRRF2	Q9Y608	Q9Y608	Leucine-rich repeat flightless-interacting protein 2 (LRR FLII-interacting protein 2)	2		0.000964813	4.52945e-05		0.730014	CT226
PODXL	O00592	O00592	Podocalyxin (GCTM-2 antigen) (Gp200) (Podocalyxin-like protein 1) (PC) (PCLP-1)	2		0.00571459	4.52945e-05	0
S10AE	Q9HCY8	Q9HCY8	Protein S100-A14 (S100 calcium-binding protein A14) (S114)	2		0.00571459		0.03
1433Z	P63104	P63104	14-3-3 protein zeta/delta (Protein kinase C inhibitor protein 1) (KCIP-1)	2		0.0058036	4.52945e-05	0			25920978
KTN1	Q86UP2	Q86UP2	Kinectin (CG-1 antigen) (Kinesin receptor)	2		0.00643512	4.52945e-05		0.964721	CT005
PPM1G	O15355	O15355	Protein phosphatase 1G (EC 3.1.3.16) (Protein phosphatase 1C) (Protein phosphatase 2C isoform gamma) (PP2C-gamma) (Protein phosphatase magnesium-dependent 1 gamma)	2		0.022871	4.52945e-05		0.626105	CT383b_156-243
4F2	P08195	P08195	4F2 cell-surface antigen heavy chain (4F2hc) (4F2 heavy chain antigen) (Lymphocyte activation antigen 4F2 large subunit) (Solute carrier family 3 member 2) (CD antigen CD98)	2		0.022871	4.52945e-05	0
PDIA6	Q15084	Q15084	Protein disulfide-isomerase A6 (EC 5.3.4.1) (Endoplasmic reticulum protein 5) (ER protein 5) (ERp5) (Protein disulfide isomerase P5) (Thioredoxin domain-containing protein 7)	2		0.022871	0.022871	0
TXND5	Q8NBS9	Q8NBS9	Thioredoxin domain-containing protein 5 (Endoplasmic reticulum resident protein 46) (ER protein 46) (ERp46) (Thioredoxin-like protein p46)	2		0.022871		0
SQSTM	Q13501	Q13501	Sequestosome-1 (EBI3-associated protein of 60 kDa) (EBIAP) (p60) (Phosphotyrosine-independent ligand for the Lck SH2 domain of 62 kDa) (Ubiquitin-binding protein p62)	2		0.0747595	4.52945e-05	0
CE170	Q5SW79	Q5SW79	Centrosomal protein of 170 kDa (Cep170) (KARP-1-binding protein) (KARP1-binding protein)	2			4.52945e-05		0.81272	IncA	26220855
YTHD2	Q9Y5A9	Q9Y5A9	YTH domain-containing family protein 2 (CLL-associated antigen KW-14) (High-glucose-regulated protein 8) (Renal carcinoma antigen NY-REN-2)	2			4.52945e-05	0.05			26042774
MARE1	Q15691	Q15691	Microtubule-associated protein RP/EB family member 1 (APC-binding protein EB1) (End-binding protein 1) (EB1)	2			4.52945e-05		0.997817	CT005
RD23B	P54727	P54727	UV excision repair protein RAD23 homolog B (HR23B) (hHR23B) (XP-C repair-complementing complex 58 kDa protein) (p58)	2			4.52945e-05		0.705172	CT195_212-363
IF5	P55010	P55010	Eukaryotic translation initiation factor 5 (eIF-5)	2			4.52945e-05		0.946566	CT788_26-166
HMOX2	P30519	P30519	Heme oxygenase 2 (HO-2) (EC 1.14.14.18)	2			4.52945e-05	0
PCM1	Q15154	Q15154	Pericentriolar material 1 protein (PCM-1) (hPCM-1)	2			4.52945e-05	0
NHRF2	Q15599	Q15599	Na(+)/H(+) exchange regulatory cofactor NHE-RF2 (NHERF-2) (NHE3 kinase A regulatory protein E3KARP) (SRY-interacting protein 1) (SIP-1) (Sodium-hydrogen exchanger regulatory factor 2) (Solute carrier family 9 isoform A3 regulatory factor 2) (Tyrosine kinase activator protein 1) (TKA-1)	2			4.52945e-05	0.03
CADH2	P19022	P19022	Cadherin-2 (CDw325) (Neural cadherin) (N-cadherin) (CD antigen CD325)	2			0.000964813		0.741174	INCE_CHLTR_MS
COF1	P23528	P23528	Cofilin-1 (18 kDa phosphoprotein) (p18) (Cofilin, non-muscle isoform)	2			0.000964813	0
TPD54	O43399	O43399	Tumor protein D54 (hD54) (Tumor protein D52-like 2)	2			0.000964813	0
G6PI	P06744	P06744	Glucose-6-phosphate isomerase (GPI) (EC 5.3.1.9) (Autocrine motility factor) (AMF) (Neuroleukin) (NLK) (Phosphoglucose isomerase) (PGI) (Phosphohexose isomerase) (PHI) (Sperm antigen 36) (SA-36)	2			0.000964813	0.03
CLH1	Q00610	Q00610	Clathrin heavy chain 1 (Clathrin heavy chain on chromosome 17) (CLH-17)	2			0.00571459	0
IPO5	O00410	O00410	Importin-5 (Imp5) (Importin subunit beta-3) (Karyopherin beta-3) (Ran-binding protein 5) (RanBP5)	2			0.022871		0.589965	CT383b_156-243
DYHC1	Q14204	Q14204	Cytoplasmic dynein 1 heavy chain 1 (Cytoplasmic dynein heavy chain 1) (Dynein heavy chain, cytosolic)	2			0.022871	0.01
FLII	Q13045	Q13045	Protein flightless-1 homolog	2				0	0.967044	CT226	26042774
RAB35	Q15286	Q15286	Ras-related protein Rab-35 (GTP-binding protein RAY) (Ras-related protein Rab-1C)	2				0	0.834749	CT229	26042774
SNX5	Q9Y5X3	Q9Y5X3	Sorting nexin-5	2				0	0.996192	INCE_CHLTR_101-132, INCE_CHLTR_MS	26042774
SNX2	O60749	O60749	Sorting nexin-2 (Transformation-related gene 9 protein) (TRG-9)	2				0	0.995783	INCE_CHLTR_101-132, INCE_CHLTR_MS	26042774
RAC1	P63000	P63000	Ras-related C3 botulinum toxin substrate 1 (Cell migration-inducing gene 5 protein) (Ras-like protein TC25) (p21-Rac1)	2				0.03	0.745127	INCE_CHLTR_MS	26042774
SNX6	Q9UNH7	Q9UNH7	Sorting nexin-6 (TRAF4-associated factor 2) [Cleaved into: Sorting nexin-6, N-terminally processed]	2				0	0.988301	INCE_CHLTR_MS, INCE_CHLTR_101-132	26042774
1433G	P61981	P61981	14-3-3 protein gamma (Protein kinase C inhibitor protein 1) (KCIP-1) [Cleaved into: 14-3-3 protein gamma, N-terminally processed]	2				0	0.897829	CT006	25920978
COL4A3BP	Q9Y5P4	Q9Y5P4	Collagen type IV alpha-3-binding protein (Ceramide transfer protein) (hCERT) (Goodpasture antigen-binding protein) (GPBP) (START domain-containing protein 11) (StARD11) (StAR-related lipid transfer protein 11)	2				0	0.992329	INCD_CHLTR_MS	21731489
TMED7	Q9Y3B3	Q9Y3B3	Transmembrane emp24 domain-containing protein 7 (p24 family protein gamma-3) (p24gamma3) (p27)	2				0.03	0.99788	CT005
STT3B	Q8TCJ2	Q8TCJ2	Dolichyl-diphosphooligosaccharide--protein glycosyltransferase subunit STT3B (Oligosaccharyl transferase subunit STT3B) (STT3-B) (EC 2.4.99.18) (Source of immunodominant MHC-associated peptides homolog)	2				0	0.898621	CT005
RER1	O15258	O15258	Protein RER1	2				0.03	0.81534	CT005
AP1B1	Q10567	Q10567	AP-1 complex subunit beta-1 (Adaptor protein complex AP-1 subunit beta-1) (Adaptor-related protein complex 1 subunit beta-1) (Beta-1-adaptin) (Beta-adaptin 1) (Clathrin assembly protein complex 1 beta large chain) (Golgi adaptor HA1/AP1 adaptin beta subunit)	2				0.04	0.784207	CT005
CCDC47	Q96A33	Q96A33	Coiled-coil domain-containing protein 47	2				0	0.708287	CT005
ERMP1	Q7Z2K6	Q7Z2K6	Endoplasmic reticulum metallopeptidase 1 (EC 3.4.-.-) (Felix-ina)	2				0	0.700889	CT005
DNAJC10	Q8IXB1	Q8IXB1	DnaJ homolog subfamily C member 10 (EC 1.8.4.-) (Endoplasmic reticulum DNA J domain-containing protein 5) (ER-resident protein ERdj5) (ERdj5) (Macrothioredoxin) (MTHr)	2				0.03	0.865111	CT058_57-367
LEPRE1	Q32P28	Q32P28	Prolyl 3-hydroxylase 1 (EC 1.14.11.7) (Growth suppressor 1) (Leucine- and proline-enriched proteoglycan 1) (Leprecan-1)	2				0.01	0.766067	CT058_57-367
UGGT1	Q9NYU2	Q9NYU2	UDP-glucose:glycoprotein glucosyltransferase 1 (UGT1) (hUGT1) (EC 2.4.1.-) (UDP--Glc:glycoprotein glucosyltransferase) (UDP-glucose ceramide glucosyltransferase-like 1)	2				0	0.691411	CT058_57-367
ATL3	Q6DD88	Q6DD88	Atlastin-3 (EC 3.6.5.-)	2				0.03	0.933645	CT135_57-360
DCTN1	Q14203	Q14203	Dynactin subunit 1 (150 kDa dynein-associated polypeptide) (DAP-150) (DP-150) (p135) (p150-glued)	2				0.03	0.987268	CT192
DCTN4	Q9UJW0	Q9UJW0	Dynactin subunit 4 (Dyn4) (Dynactin subunit p62)	2				0	0.964893	CT192
FHL2	Q14192	Q14192	Four and a half LIM domains protein 2 (FHL-2) (LIM domain protein DRAL) (Skeletal muscle LIM-protein 3) (SLIM-3)	2				0	0.960394	CT192
COPG1	Q9Y678	Q9Y678	Coatomer subunit gamma-1 (Gamma-1-coat protein) (Gamma-1-COP)	2				0.04	0.538079	CT223_84-270
TRAF7	Q6Q0C0	Q6Q0C0	E3 ubiquitin-protein ligase TRAF7 (EC 2.3.2.27) (RING finger and WD repeat-containing protein 1) (RING finger protein 119) (RING-type E3 ubiquitin transferase TRAF7) (TNF receptor-associated factor 7)	2				0.04	0.983118	CT224, CT224_84-147
RAB1B	Q9H0U4	Q9H0U4	Ras-related protein Rab-1B	2				0	0.839384	CT229
ATP6V0D1	P61421	P61421	V-type proton ATPase subunit d 1 (V-ATPase subunit d 1) (32 kDa accessory protein) (V-ATPase 40 kDa accessory protein) (V-ATPase AC39 subunit) (p39) (Vacuolar proton pump subunit d 1)	2				0.03	0.964412	CT357
ATP6AP2	O75787	O75787	Renin receptor (ATPase H(+)-transporting lysosomal accessory protein 2) (ATPase H(+)-transporting lysosomal-interacting protein 2) (ER-localized type I transmembrane adaptor) (Embryonic liver differentiation factor 10) (N14F) (Renin/prorenin receptor) (Vacuolar ATP synthase membrane sector-associated protein M8-9) (ATP6M8-9) (V-ATPase M8.9 subunit)	2				0.03	0.959431	CT357
ATP6V0A1	Q93050	Q93050	V-type proton ATPase 116 kDa subunit a isoform 1 (V-ATPase 116 kDa isoform a1) (Clathrin-coated vesicle/synaptic vesicle proton pump 116 kDa subunit) (Vacuolar adenosine triphosphatase subunit Ac116) (Vacuolar proton pump subunit 1) (Vacuolar proton translocating ATPase 116 kDa subunit a isoform 1)	2				0	0.937975	CT357
KDSR	Q06136	Q06136	3-ketodihydrosphingosine reductase (KDS reductase) (EC 1.1.1.102) (3-dehydrosphinganine reductase) (Follicular variant translocation protein 1) (FVT-1) (Short chain dehydrogenase/reductase family 35C member 1)	2				0.03	0.700948	CT357
HYOU1	Q9Y4L1	Q9Y4L1	Hypoxia up-regulated protein 1 (150 kDa oxygen-regulated protein) (ORP-150) (170 kDa glucose-regulated protein) (GRP-170)	2				0	0.710418	CT442_71-150
HM13	Q8TCT9	Q8TCT9	Minor histocompatibility antigen H13 (EC 3.4.23.-) (Intramembrane protease 1) (IMP-1) (IMPAS-1) (hIMP1) (Presenilin-like protein 3) (Signal peptide peptidase)	2				0	0.75112	CT449_17-110
NMD3	Q96D46	Q96D46	60S ribosomal export protein NMD3 (hNMD3)	2				0.04	0.807307	CT556
VKORC1L1	Q8N0U8	Q8N0U8	Vitamin K epoxide reductase complex subunit 1-like protein 1 (VKORC1-like protein 1) (EC 1.17.4.4)	2				0.03	0.708076	CT556, CT449_17-110
SCAMP3	O14828	O14828	Secretory carrier-associated membrane protein 3 (Secretory carrier membrane protein 3)	2				0	0.781587	CT565b_1-144
NCEH1	Q6PIU2	Q6PIU2	Neutral cholesterol ester hydrolase 1 (NCEH) (EC 3.1.1.-) (Arylacetamide deacetylase-like 1)	2				0.03	0.755489	CT565b_1-144
ALG1	Q9BT22	Q9BT22	Chitobiosyldiphosphodolichol beta-mannosyltransferase (EC 2.4.1.142) (Asparagine-linked glycosylation protein 1 homolog) (Beta-1,4-mannosyltransferase) (GDP-Man:GlcNAc2-PP-dolichol mannosyltransferase) (GDP-mannose-dolichol diphosphochitobiose mannosyltransferase) (Mannosyltransferase-1) (MT-1) (hMat-1)	2				0.03	0.877532	CT788_26-166
INF2	Q27J81	Q27J81	Inverted formin-2 (HBEBP2-binding protein C)	2				0.01	0.81476	CT788_26-166
PPP4R1	Q8TF05	Q8TF05	Serine/threonine-protein phosphatase 4 regulatory subunit 1	2				0.03	0.991328	CT813
PPP4C	P60510	P60510	Serine/threonine-protein phosphatase 4 catalytic subunit (PP4C) (Pp4) (EC 3.1.3.16) (Protein phosphatase X) (PP-X)	2				0.03	0.814605	CT813
MPRI	P11717	P11717	Cation-independent mannose-6-phosphate receptor (CI Man-6-P receptor) (CI-MPR) (M6PR) (300 kDa mannose 6-phosphate receptor) (MPR 300) (Insulin-like growth factor 2 receptor) (Insulin-like growth factor II receptor) (IGF-II receptor) (M6P/IGF2 receptor) (M6P/IGF2R) (CD antigen CD222)	2				0	0.892171	INCE_CHLTR_MS
LMAN2	Q12907	Q12907	Vesicular integral-membrane protein VIP36 (Glycoprotein GP36b) (Lectin mannose-binding 2) (Vesicular integral-membrane protein 36) (VIP36)	2				0	0.869793	INCE_CHLTR_MS
TEX264	Q9Y6I9	Q9Y6I9	Testis-expressed protein 264 (Putative secreted protein Zsig11)	2				0.03	0.76305	INCE_CHLTR_MS
CAPNS1	P04632	P04632	Calpain small subunit 1 (CSS1) (Calcium-activated neutral proteinase small subunit) (CANP small subunit) (Calcium-dependent protease small subunit) (CDPS) (Calcium-dependent protease small subunit 1) (Calpain regulatory subunit)	2				0	0.620606	INCF_CHLTR_1-26
NUCB1	Q02818	Q02818	Nucleobindin-1 (CALNUC)	1	4.52945e-05	4.52945e-05	4.52945e-05
NUCB2	P80303	P80303	Nucleobindin-2 (DNA-binding protein NEFA) (Gastric cancer antigen Zg4) (Prepronesfatin) [Cleaved into: Nesfatin-1]	1	4.52945e-05	4.52945e-05	0.000964813
MYH9	P35579	P35579	Myosin-9 (Cellular myosin heavy chain, type A) (Myosin heavy chain 9) (Myosin heavy chain, non-muscle IIa) (Non-muscle myosin heavy chain A) (NMMHC-A) (Non-muscle myosin heavy chain IIa) (NMMHC II-a) (NMMHC-IIA)	1	4.52945e-05	0.000964813	4.52945e-05				23727243
EMC10	Q5UCC4	Q5UCC4	ER membrane protein complex subunit 10 (Hematopoietic signal peptide-containing membrane domain-containing protein 1)	1	4.52945e-05	0.224193	0.0747595
TRFL	P02788	P02788	Lactotransferrin (Lactoferrin) (EC 3.4.21.-) (Growth-inhibiting protein 12) (Talalactoferrin) [Cleaved into: Lactoferricin-H (Lfcin-H); Kaliocin-1; Lactoferroxin-A; Lactoferroxin-B; Lactoferroxin-C]	1	4.52945e-05	0.557128	0.420117
CYC	P99999	P99999	Cytochrome c	1	0.000964813	0.00571459
CAV1	Q03135	Q03135	Caveolin-1	1	0.000964813	0.0397111	4.52945e-05				11399051
EME2	A4GXA9	A4GXA9	Probable crossover junction endonuclease EME2 (EC 3.1.22.-)	1	0.00344557	0.0747595
INP4A	Q96PE3	Q96PE3	Type I inositol 3,4-bisphosphate 4-phosphatase (EC 3.1.3.66) (Inositol polyphosphate 4-phosphatase type I)	1	0.00411967	0.224193	0.0987194
FUS	P35637	P35637	RNA-binding protein FUS (75 kDa DNA-pairing protein) (Oncogene FUS) (Oncogene TLS) (POMp75) (Translocated in liposarcoma protein)	1	0.00571459	0.0226318	4.52945e-05
DHX9	Q08211	Q08211	ATP-dependent RNA helicase A (RHA) (EC 3.6.4.13) (DEAH box protein 9) (Leukophysin) (LKP) (Nuclear DNA helicase II) (NDH II)	1	0.00571459	0.022871
H14	P10412	P10412	Histone H1.4 (Histone H1b) (Histone H1s-4)	1	0.00571459	0.11665	0.76239
AKND1	Q5T1N1	Q5T1N1	Protein AKNAD1	1	0.00571459	0.208057	0.022871
H4	P62805	P62805	Histone H4	1	0.00571459	0.312488	0.00571459
TALDO	P37837	P37837	Transaldolase (EC 2.2.1.2)	1	0.00571459		0.022871
KLK7	P49862	P49862	Kallikrein-7 (hK7) (EC 3.4.21.117) (Serine protease 6) (Stratum corneum chymotryptic enzyme) (hSCCE)	1	0.00571459
MAP7	Q14244	Q14244	Ensconsin (Epithelial microtubule-associated protein of 115 kDa) (E-MAP-115) (Microtubule-associated protein 7) (MAP-7)	1	0.022871	4.52945e-05	4.52945e-05
RCN2	Q14257	Q14257	Reticulocalbin-2 (Calcium-binding protein ERC-55) (E6-binding protein) (E6BP)	1	0.022871	4.52945e-05	4.52945e-05
UBP2L	Q14157	Q14157	Ubiquitin-associated protein 2-like (Protein NICE-4)	1	0.022871	4.52945e-05	4.52945e-05
EF1B	P24534	P24534	Elongation factor 1-beta (EF-1-beta)	1	0.022871	4.52945e-05	9.1558e-05
MYL6	P60660	P60660	Myosin light polypeptide 6 (17 kDa myosin light chain) (LC17) (Myosin light chain 3) (MLC-3) (Myosin light chain alkali 3) (Myosin light chain A3) (Smooth muscle and nonmuscle myosin light chain alkali 6)	1	0.022871	0.000692444	1.20668e-06
KCRB	P12277	P12277	Creatine kinase B-type (EC 2.7.3.2) (B-CK) (Creatine kinase B chain)	1	0.022871	0.000964813	0.022871
F192A	Q9GZU8	Q9GZU8	Protein FAM192A (NEFA-interacting nuclear protein NIP30)	1	0.022871	0.000964813	0.430962
CLCB	P09497	P09497	Clathrin light chain B (Lcb)	1	0.022871	0.00571459	4.52945e-05
PDCD5	O14737	O14737	Programmed cell death protein 5 (TF-1 cell apoptosis-related protein 19) (Protein TFAR19)	1	0.022871	0.00571459	4.52945e-05
UCK2	Q9BZX2	Q9BZX2	Uridine-cytidine kinase 2 (UCK 2) (EC 2.7.1.48) (Cytidine monophosphokinase 2) (Testis-specific protein TSA903) (Uridine monophosphokinase 2)	1	0.022871	0.00571459	0.00571459
SPB4	P48594	P48594	Serpin B4 (Leupin) (Peptidase inhibitor 11) (PI-11) (Squamous cell carcinoma antigen 2) (SCCA-2)	1	0.022871	0.00571459	1
TB182	Q9C0C2	Q9C0C2	182 kDa tankyrase-1-binding protein	1	0.022871	0.0065465	4.52945e-05
K2C1B	Q7Z794	Q7Z794	Keratin, type II cytoskeletal 1b (Cytokeratin-1B) (CK-1B) (Keratin-77) (K77) (Type-II keratin Kb39)	1	0.022871	0.022871	0.00571459
PEBP1	P30086	P30086	Phosphatidylethanolamine-binding protein 1 (PEBP-1) (HCNPpp) (Neuropolypeptide h3) (Prostatic-binding protein) (Raf kinase inhibitor protein) (RKIP) [Cleaved into: Hippocampal cholinergic neurostimulating peptide (HCNP)]	1	0.022871	0.022871	0.0167676
PRPC	P02810	P02810	Salivary acidic proline-rich phosphoprotein 1/2 (Db-s) (PRP-1/PRP-2) (Parotid acidic protein) (Pa) (Parotid double-band protein) (Parotid isoelectric focusing variant protein) (PIF-S) (Parotid proline-rich protein 1/2) (Pr1/Pr2) (Protein C) [Cleaved into: Salivary acidic proline-rich phosphoprotein 1/2; Salivary acidic proline-rich phosphoprotein 3/4 (Db-F) (PIF-F) (PRP-3/PRP-4) (Protein A); Pept…	1	0.022871	0.022871	0.110537
AACT	P01011	P01011	Alpha-1-antichymotrypsin (ACT) (Cell growth-inhibiting gene 24/25 protein) (Serpin A3) [Cleaved into: Alpha-1-antichymotrypsin His-Pro-less]	1	0.022871	0.0747595
RADI	P35241	P35241	Radixin	1	0.022871	0.0747595
HSP72	P54652	P54652	Heat shock-related 70 kDa protein 2 (Heat shock 70 kDa protein 2)	1	0.022871	0.167596	0.022871
AHNK2	Q8IVF2	Q8IVF2	Protein AHNAK2	1	0.022871	0.212864	0.000964813
MISP	Q8IVT2	Q8IVT2	Mitotic interactor and substrate of PLK1 (Mitotic spindle positioning protein)	1	0.022871	0.349741	4.52945e-05
IGHA1	P01876	P01876	Ig alpha-1 chain C region	1	0.022871	0.352547	0.38008
CBPA4	Q9UI42	Q9UI42	Carboxypeptidase A4 (EC 3.4.17.-) (Carboxypeptidase A3)	1	0.022871	0.386838
EMD	P50402	P50402	Emerin	1	0.022871	0.429251	0.00322718
K1C13	P13646	P13646	Keratin, type I cytoskeletal 13 (Cytokeratin-13) (CK-13) (Keratin-13) (K13)	1	0.022871	0.557128
T4S1	P30408	P30408	Transmembrane 4 L6 family member 1 (Membrane component chromosome 3 surface marker 1) (Tumor-associated antigen L6)	1	0.022871	0.663988	0.022871
PSB2	P49721	P49721	Proteasome subunit beta type-2 (EC 3.4.25.1) (Macropain subunit C7-I) (Multicatalytic endopeptidase complex subunit C7-I) (Proteasome component C7-I)	1	0.022871	0.825203	0.022871
DSG2	Q14126	Q14126	Desmoglein-2 (Cadherin family member 5) (HDGC)	1	0.022871		4.52945e-05
KCY	P30085	P30085	UMP-CMP kinase (EC 2.7.4.14) (Deoxycytidylate kinase) (CK) (dCMP kinase) (Nucleoside-diphosphate kinase) (EC 2.7.4.6) (Uridine monophosphate/cytidine monophosphate kinase) (UMP/CMP kinase) (UMP/CMPK)	1	0.022871		0.00571459
K2C79	Q5XKE5	Q5XKE5	Keratin, type II cytoskeletal 79 (Cytokeratin-79) (CK-79) (Keratin-6-like) (Keratin-6L) (Keratin-79) (K79) (Type-II keratin Kb38)	1	0.022871		0.022871
MDHM	P40926	P40926	Malate dehydrogenase, mitochondrial (EC 1.1.1.37)	1	0.022871		0.022871
K2C6C	P48668	P48668	Keratin, type II cytoskeletal 6C (Cytokeratin-6C) (CK-6C) (Cytokeratin-6E) (CK-6E) (Keratin K6h) (Keratin-6C) (K6C) (Type-II keratin Kb12)	1	0.022871		0.557128
SEPT7	Q16181	Q16181	Septin-7 (CDC10 protein homolog)	1	0.022871
CO3	P01024	P01024	Complement C3 (C3 and PZP-like alpha-2-macroglobulin domain-containing protein 1) [Cleaved into: Complement C3 beta chain; C3-beta-c (C3bc); Complement C3 alpha chain; C3a anaphylatoxin; Acylation stimulating protein (ASP) (C3adesArg); Complement C3b alpha' chain; Complement C3c alpha' chain fragment 1; Complement C3dg fragment; Complement C3g fragment; Complement C3d fragment; Complement C3f fra…	1	0.022871
HDGR2	Q7Z4V5	Q7Z4V5	Hepatoma-derived growth factor-related protein 2 (HRP-2) (Hepatoma-derived growth factor 2) (HDGF-2)	1	0.022871
ILF2	Q12905	Q12905	Interleukin enhancer-binding factor 2 (Nuclear factor of activated T-cells 45 kDa)	1	0.022871
PPGB	P10619	P10619	Lysosomal protective protein (EC 3.4.16.5) (Carboxypeptidase C) (Carboxypeptidase L) (Cathepsin A) (Protective protein cathepsin A) (PPCA) (Protective protein for beta-galactosidase) [Cleaved into: Lysosomal protective protein 32 kDa chain; Lysosomal protective protein 20 kDa chain]	1	0.022871
RS30	P62861	P62861	40S ribosomal protein S30	1	0.022871
S100P	P25815	P25815	Protein S100-P (Migration-inducing gene 9 protein) (MIG9) (Protein S100-E) (S100 calcium-binding protein P)	1	0.022871
APOB	P04114	P04114	Apolipoprotein B-100 (Apo B-100) [Cleaved into: Apolipoprotein B-48 (Apo B-48)]	1	0.0266237	0.00571459	0.000964813
BST2	Q10589	Q10589	Bone marrow stromal antigen 2 (BST-2) (HM1.24 antigen) (Tetherin) (CD antigen CD317)	1	0.0747595	3.15159e-05	1.78545e-07
EWS	Q01844	Q01844	RNA-binding protein EWS (EWS oncogene) (Ewing sarcoma breakpoint region 1 protein)	1	0.0747595	0.0440426	4.52945e-05
SNAG	Q99747	Q99747	Gamma-soluble NSF attachment protein (SNAP-gamma) (N-ethylmaleimide-sensitive factor attachment protein gamma)	1	0.0896795	0.022871	4.52945e-05
CALL3	P27482	P27482	Calmodulin-like protein 3 (CaM-like protein) (CLP) (Calmodulin-related protein NB-1)	1	0.108863	0.254222	0.000964813
RCN1	Q15293	Q15293	Reticulocalbin-1	1	0.134164	0.087405	0.448408	0
PAI2	P05120	P05120	Plasminogen activator inhibitor 2 (PAI-2) (Monocyte Arg-serpin) (Placental plasminogen activator inhibitor) (Serpin B2) (Urokinase inhibitor)	1	0.195181	0.022871
CALM	P62158	P62158	Calmodulin (CaM)	1	0.209706	0.022871	4.52945e-05
MARCS	P29966	P29966	Myristoylated alanine-rich C-kinase substrate (MARCKS) (Protein kinase C substrate, 80 kDa protein, light chain) (80K-L protein) (PKCSL)	1	0.212864	0.00096121	3.63229e-05
S10AG	Q96FQ6	Q96FQ6	Protein S100-A16 (Aging-associated gene 13 protein) (Protein S100-F) (S100 calcium-binding protein A16)	1	0.212864	0.00342286	3.94145e-07
ABLM1	O14639	O14639	Actin-binding LIM protein 1 (abLIM-1) (Actin-binding LIM protein family member 1) (Actin-binding double zinc finger protein) (LIMAB1) (Limatin)	1	0.212864	0.022871
IF4B	P23588	P23588	Eukaryotic translation initiation factor 4B (eIF-4B)	1	0.224193	6.52869e-06	9.10077e-05
LASP1	Q14847	Q14847	LIM and SH3 domain protein 1 (LASP-1) (Metastatic lymph node gene 50 protein) (MLN 50)	1	0.224193	6.89976e-05	1.80418e-07
SC61B	P60468	P60468	Protein transport protein Sec61 subunit beta	1	0.224193	7.87227e-05	6.22728e-06				29078338
TAGL2	P37802	P37802	Transgelin-2 (Epididymis tissue protein Li 7e) (SM22-alpha homolog)	1	0.224193	0.000103597	7.26724e-06
LAMP1	P11279	P11279	Lysosome-associated membrane glycoprotein 1 (LAMP-1) (Lysosome-associated membrane protein 1) (CD107 antigen-like family member A) (CD antigen CD107a)	1	0.224193	0.00147295	4.2974e-05
FUBP1	Q96AE4	Q96AE4	Far upstream element-binding protein 1 (FBP) (FUSE-binding protein 1) (DNA helicase V) (hDH V)	1	0.224193	0.0316125	2.49608e-05
PLP2	Q04941	Q04941	Proteolipid protein 2 (Differentiation-dependent protein A4) (Intestinal membrane A4 protein)	1	0.224193	0.0659241	4.17448e-05
TENS3	Q68CZ2	Q68CZ2	Tensin-3 (Tensin-like SH2 domain-containing protein 1) (Tumor endothelial marker 6)	1	0.224193	0.189497	0.00983284
RS25	P62851	P62851	40S ribosomal protein S25	1	0.224193	0.224193	4.52945e-05
LMNA	P02545	P02545	Prelamin-A/C [Cleaved into: Lamin-A/C (70 kDa lamin) (Renal carcinoma antigen NY-REN-32)]	1	0.224193	0.224193	0.0149658
TGM1	P22735	P22735	Protein-glutamine gamma-glutamyltransferase K (EC 2.3.2.13) (Epidermal TGase) (Transglutaminase K) (TG(K)) (TGK) (TGase K) (Transglutaminase-1) (TGase-1)	1	0.238387	0.022871	0.431374
HBB	P68871	P68871	Hemoglobin subunit beta (Beta-globin) (Hemoglobin beta chain) [Cleaved into: LVV-hemorphin-7; Spinorphin]	1	0.261704	0.0315007	0.224193
NPM	P06748	P06748	Nucleophosmin (NPM) (Nucleolar phosphoprotein B23) (Nucleolar protein NO38) (Numatrin)	1	0.286212	0.00171103	0.000258244
SRS11	Q05519	Q05519	Serine/arginine-rich splicing factor 11 (Arginine-rich 54 kDa nuclear protein) (p54) (Splicing factor, arginine/serine-rich 11)	1	0.286347	0.00320206	0.022871
LEG1	P09382	P09382	Galectin-1 (Gal-1) (14 kDa laminin-binding protein) (HLBP14) (14 kDa lectin) (Beta-galactoside-binding lectin L-14-I) (Galaptin) (HBL) (HPL) (Lactose-binding lectin 1) (Lectin galactoside-binding soluble 1) (Putative MAPK-activating protein PM12) (S-Lac lectin 1)	1	0.298336	0.0747595	0.0104214				29891717
SH3L3	Q9H299	Q9H299	SH3 domain-binding glutamic acid-rich-like protein 3 (SH3 domain-binding protein 1) (SH3BP-1)	1	0.335091	0.000964813	0.000964813
RAD50	Q92878	Q92878	DNA repair protein RAD50 (hRAD50) (EC 3.6.-.-)	1	0.406286	0.885773	0.022871
MAP4	P27816	P27816	Microtubule-associated protein 4 (MAP-4)	1	0.423205	0.669845	0.00243353
CH10	P61604	P61604	10 kDa heat shock protein, mitochondrial (Hsp10) (10 kDa chaperonin) (Chaperonin 10) (CPN10) (Early-pregnancy factor) (EPF)	1	0.501795	0.150698	0.00571459
VIME	P08670	P08670	Vimentin	1	0.501795	0.202831	0.000235684				18692775
FLNA	P21333	P21333	Filamin-A (FLN-A) (Actin-binding protein 280) (ABP-280) (Alpha-filamin) (Endothelial actin-binding protein) (Filamin-1) (Non-muscle filamin)	1	0.501795	0.224193	0.022871
IF6	P56537	P56537	Eukaryotic translation initiation factor 6 (eIF-6) (B(2)GCN homolog) (B4 integrin interactor) (CAB) (p27(BBP))	1	0.505068	0.924297	0.022871
SPB3	P29508	P29508	Serpin B3 (Protein T4-A) (Squamous cell carcinoma antigen 1) (SCCA-1)	1	0.591933	0.0435076	0.339375
THIO	P10599	P10599	Thioredoxin (Trx) (ATL-derived factor) (ADF) (Surface-associated sulphydryl protein) (SASP)	1	0.623113	0.00193591	2.25281e-05
PAIRB	Q8NC51	Q8NC51	Plasminogen activator inhibitor 1 RNA-binding protein (PAI1 RNA-binding protein 1) (PAI-RBP1) (SERPINE1 mRNA-binding protein 1)	1	0.668177	0.0177035	0.000114096
AHNK	Q09666	Q09666	Neuroblast differentiation-associated protein AHNAK (Desmoyokin)	1	0.77843	0.00852426	2.04995e-06
MMTA2	Q9BU76	Q9BU76	Multiple myeloma tumor-associated protein 2 (hMMTAG2)	1	0.831509	0.022871	0.224193
K2C8	P05787	P05787	Keratin, type II cytoskeletal 8 (Cytokeratin-8) (CK-8) (Keratin-8) (K8) (Type-II keratin Kb8)	1		4.52945e-05	4.52945e-05				18692775
1A68	P01891	P01891	HLA class I histocompatibility antigen, A-68 alpha chain (Aw-68) (HLA class I histocompatibility antigen, A-28 alpha chain) (MHC class I antigen A*68)	1		4.52945e-05	4.52945e-05
ANXA7	P20073	P20073	Annexin A7 (Annexin VII) (Annexin-7) (Synexin)	1		4.52945e-05	4.52945e-05
BAG3	O95817	O95817	BAG family molecular chaperone regulator 3 (BAG-3) (Bcl-2-associated athanogene 3) (Bcl-2-binding protein Bis) (Docking protein CAIR-1)	1		4.52945e-05	4.52945e-05
CALD1	Q05682	Q05682	Caldesmon (CDM)	1		4.52945e-05	4.52945e-05
CCD50	Q8IVM0	Q8IVM0	Coiled-coil domain-containing protein 50 (Protein Ymer)	1		4.52945e-05	4.52945e-05
CDV3	Q9UKY7	Q9UKY7	Protein CDV3 homolog	1		4.52945e-05	4.52945e-05
FUBP2	Q92945	Q92945	Far upstream element-binding protein 2 (FUSE-binding protein 2) (KH type-splicing regulatory protein) (KSRP) (p75)	1		4.52945e-05	4.52945e-05
HN1L	Q9H910	Q9H910	Hematological and neurological expressed 1-like protein (HN1-like protein)	1		4.52945e-05	4.52945e-05
IF4G1	Q04637	Q04637	Eukaryotic translation initiation factor 4 gamma 1 (eIF-4-gamma 1) (eIF-4G 1) (eIF-4G1) (p220)	1		4.52945e-05	4.52945e-05
ITB1	P05556	P05556	Integrin beta-1 (Fibronectin receptor subunit beta) (Glycoprotein IIa) (GPIIA) (VLA-4 subunit beta) (CD antigen CD29)	1		4.52945e-05	4.52945e-05
LEG3	P17931	P17931	Galectin-3 (Gal-3) (35 kDa lectin) (Carbohydrate-binding protein 35) (CBP 35) (Galactose-specific lectin 3) (Galactoside-binding protein) (GALBP) (IgE-binding protein) (L-31) (Laminin-binding protein) (Lectin L-29) (Mac-2 antigen)	1		4.52945e-05	4.52945e-05
MAP1B	P46821	P46821	Microtubule-associated protein 1B (MAP-1B) [Cleaved into: MAP1B heavy chain; MAP1 light chain LC1]	1		4.52945e-05	4.52945e-05
PAWR	Q96IZ0	Q96IZ0	PRKC apoptosis WT1 regulator protein (Prostate apoptosis response 4 protein) (Par-4)	1		4.52945e-05	4.52945e-05
PLIN3	O60664	O60664	Perilipin-3 (47 kDa mannose 6-phosphate receptor-binding protein) (47 kDa MPR-binding protein) (Cargo selection protein TIP47) (Mannose-6-phosphate receptor-binding protein 1) (Placental protein 17) (PP17)	1		4.52945e-05	4.52945e-05
PRC2C	Q9Y520	Q9Y520	Protein PRRC2C (BAT2 domain-containing protein 1) (HBV X-transactivated gene 2 protein) (HBV XAg-transactivated protein 2) (HLA-B-associated transcript 2-like 2) (Proline-rich and coiled-coil-containing protein 2C)	1		4.52945e-05	4.52945e-05
SORCN	P30626	P30626	Sorcin (22 kDa protein) (CP-22) (CP22) (V19)	1		4.52945e-05	4.52945e-05
SYUA	P37840	P37840	Alpha-synuclein (Non-A beta component of AD amyloid) (Non-A4 component of amyloid precursor) (NACP)	1		4.52945e-05	4.52945e-05
TTC1	Q99614	Q99614	Tetratricopeptide repeat protein 1 (TPR repeat protein 1)	1		4.52945e-05	4.52945e-05
UBAP2	Q5T6F2	Q5T6F2	Ubiquitin-associated protein 2 (UBAP-2)	1		4.52945e-05	4.52945e-05
CYB5B	O43169	O43169	Cytochrome b5 type B (Cytochrome b5 outer mitochondrial membrane isoform)	1		4.52945e-05	0.00983961
SC16A	O15027	O15027	Protein transport protein Sec16A (SEC16 homolog A)	1		4.52945e-05	0.0747595
DBNL	Q9UJU6	Q9UJU6	Drebrin-like protein (Cervical SH3P7) (Cervical mucin-associated protein) (Drebrin-F) (HPK1-interacting protein of 55 kDa) (HIP-55) (SH3 domain-containing protein 7)	1		0.000964813	4.52945e-05
EEA1	Q15075	Q15075	Early endosome antigen 1 (Endosome-associated protein p162) (Zinc finger FYVE domain-containing protein 2)	1		0.000964813	4.52945e-05
EIF3J	O75822	O75822	Eukaryotic translation initiation factor 3 subunit J (eIF3j) (Eukaryotic translation initiation factor 3 subunit 1) (eIF-3-alpha) (eIF3 p35)	1		0.000964813	4.52945e-05
G3BP1	Q13283	Q13283	Ras GTPase-activating protein-binding protein 1 (G3BP-1) (EC 3.6.4.12) (EC 3.6.4.13) (ATP-dependent DNA helicase VIII) (hDH VIII) (GAP SH3 domain-binding protein 1)	1		0.000964813	4.52945e-05
HAP28	Q13442	Q13442	28 kDa heat- and acid-stable phosphoprotein (PDGF-associated protein) (PAP) (PDGFA-associated protein 1) (PAP1)	1		0.000964813	4.52945e-05
HNRDL	O14979	O14979	Heterogeneous nuclear ribonucleoprotein D-like (hnRNP D-like) (hnRNP DL) (AU-rich element RNA-binding factor) (JKT41-binding protein) (Protein laAUF1)	1		0.000964813	4.52945e-05
LIMC1	Q9UPQ0	Q9UPQ0	LIM and calponin homology domains-containing protein 1	1		0.000964813	4.52945e-05
MRP	P49006	P49006	MARCKS-related protein (MARCKS-like protein 1) (Macrophage myristoylated alanine-rich C kinase substrate) (Mac-MARCKS) (MacMARCKS)	1		0.000964813	4.52945e-05
NASP	P49321	P49321	Nuclear autoantigenic sperm protein (NASP)	1		0.000964813	4.52945e-05
NHRF1	O14745	O14745	Na(+)/H(+) exchange regulatory cofactor NHE-RF1 (NHERF-1) (Ezrin-radixin-moesin-binding phosphoprotein 50) (EBP50) (Regulatory cofactor of Na(+)/H(+) exchanger) (Sodium-hydrogen exchanger regulatory factor 1) (Solute carrier family 9 isoform A3 regulatory factor 1)	1		0.000964813	4.52945e-05
TACC3	Q9Y6A5	Q9Y6A5	Transforming acidic coiled-coil-containing protein 3 (ERIC-1)	1		0.000964813	4.52945e-05
GOGA2	Q08379	Q08379	Golgin subfamily A member 2 (130 kDa cis-Golgi matrix protein) (GM130) (GM130 autoantigen) (Golgin-95)	1		0.00571459	4.52945e-05				19060882
CYTSB	Q5M775	Q5M775	Cytospin-B (Nuclear structure protein 5) (NSP5) (Sperm antigen HCMOGT-1) (Sperm antigen with calponin homology and coiled-coil domains 1)	1		0.00571459	4.52945e-05
GRAP1	Q4V328	Q4V328	GRIP1-associated protein 1 (GRASP-1)	1		0.00571459	4.52945e-05
RANG	P43487	P43487	Ran-specific GTPase-activating protein (Ran-binding protein 1) (RanBP1)	1		0.00571459	4.52945e-05
SCAFB	Q99590	Q99590	Protein SCAF11 (CTD-associated SR protein 11) (Renal carcinoma antigen NY-REN-40) (SC35-interacting protein 1) (SR-related and CTD-associated factor 11) (SRSF2-interacting protein) (Serine/arginine-rich splicing factor 2-interacting protein) (Splicing factor, arginine/serine-rich 2-interacting protein) (Splicing regulatory protein 129) (SRrp129)	1		0.00571459	4.52945e-05
SNP29	O95721	O95721	Synaptosomal-associated protein 29 (SNAP-29) (Soluble 29 kDa NSF attachment protein) (Vesicle-membrane fusion protein SNAP-29)	1		0.00571459	4.52945e-05
TCTP	P13693	P13693	Translationally-controlled tumor protein (TCTP) (Fortilin) (Histamine-releasing factor) (HRF) (p23)	1		0.00571459	4.52945e-05
TMF1	P82094	P82094	TATA element modulatory factor (TMF) (Androgen receptor coactivator 160 kDa protein) (Androgen receptor-associated protein of 160 kDa)	1		0.00571459	4.52945e-05
YBOX3	P16989	P16989	Y-box-binding protein 3 (Cold shock domain-containing protein A) (DNA-binding protein A) (Single-strand DNA-binding protein NF-GMB)	1		0.00571459	4.52945e-05
SF3B2	Q13435	Q13435	Splicing factor 3B subunit 2 (Pre-mRNA-splicing factor SF3b 145 kDa subunit) (SF3b145) (SF3b150) (Spliceosome-associated protein 145) (SAP 145)	1		0.00571459	0.000964813
A2ML1	A8K2U0	A8K2U0	Alpha-2-macroglobulin-like protein 1 (C3 and PZP-like alpha-2-macroglobulin domain-containing protein 9)	1		0.00571459
K1C27	Q7Z3Y8	Q7Z3Y8	Keratin, type I cytoskeletal 27 (Cytokeratin-27) (CK-27) (Keratin-25C) (K25C) (Keratin-27) (K27) (Type I inner root sheath-specific keratin-K25irs3)	1		0.00571459
CLCA	P09496	P09496	Clathrin light chain A (Lca)	1		0.00804838	4.52945e-05
ACINU	Q9UKV3	Q9UKV3	Apoptotic chromatin condensation inducer in the nucleus (Acinus)	1		0.022871	4.52945e-05
CYTB	P04080	P04080	Cystatin-B (CPI-B) (Liver thiol proteinase inhibitor) (Stefin-B)	1		0.022871	4.52945e-05
DREB	Q16643	Q16643	Drebrin (Developmentally-regulated brain protein)	1		0.022871	4.52945e-05
ECE1	P42892	P42892	Endothelin-converting enzyme 1 (ECE-1) (EC 3.4.24.71)	1		0.022871	4.52945e-05
HGS	O14964	O14964	Hepatocyte growth factor-regulated tyrosine kinase substrate (Hrs) (Protein pp110)	1		0.022871	4.52945e-05
K2C7	P08729	P08729	Keratin, type II cytoskeletal 7 (Cytokeratin-7) (CK-7) (Keratin-7) (K7) (Sarcolectin) (Type-II keratin Kb7)	1		0.022871	4.52945e-05
MA7D3	Q8IWC1	Q8IWC1	MAP7 domain-containing protein 3	1		0.022871	4.52945e-05
MTPN	P58546	P58546	Myotrophin (Protein V-1)	1		0.022871	4.52945e-05
NP1L1	P55209	P55209	Nucleosome assembly protein 1-like 1 (NAP-1-related protein) (hNRP)	1		0.022871	4.52945e-05
NUFP2	Q7Z417	Q7Z417	Nuclear fragile X mental retardation-interacting protein 2 (82 kDa FMRP-interacting protein) (82-FIP) (Cell proliferation-inducing gene 1 protein) (FMRP-interacting protein 2)	1		0.022871	4.52945e-05
PP12C	Q9BZL4	Q9BZL4	Protein phosphatase 1 regulatory subunit 12C (Protein phosphatase 1 myosin-binding subunit of 85 kDa) (Protein phosphatase 1 myosin-binding subunit p85)	1		0.022871	4.52945e-05
PYM1	Q9BRP8	Q9BRP8	Partner of Y14 and mago (PYM homolog 1 exon junction complex-associated factor) (Protein wibg homolog)	1		0.022871	4.52945e-05
RBP56	Q92804	Q92804	TATA-binding protein-associated factor 2N (68 kDa TATA-binding protein-associated factor) (TAF(II)68) (TAFII68) (RNA-binding protein 56)	1		0.022871	4.52945e-05
RS28	P62857	P62857	40S ribosomal protein S28	1		0.022871	4.52945e-05
S10AB	P31949	P31949	Protein S100-A11 (Calgizzarin) (Metastatic lymph node gene 70 protein) (MLN 70) (Protein S100-C) (S100 calcium-binding protein A11) [Cleaved into: Protein S100-A11, N-terminally processed]	1		0.022871	4.52945e-05
SYAP1	Q96A49	Q96A49	Synapse-associated protein 1	1		0.022871	4.52945e-05
TBCA	O75347	O75347	Tubulin-specific chaperone A (TCP1-chaperonin cofactor A) (Tubulin-folding cofactor A) (CFA)	1		0.022871	4.52945e-05
TM109	Q9BVC6	Q9BVC6	Transmembrane protein 109 (Mitsugumin-23) (Mg23)	1		0.022871	4.52945e-05
WASF2	Q9Y6W5	Q9Y6W5	Wiskott-Aldrich syndrome protein family member 2 (WASP family protein member 2) (Protein WAVE-2) (Verprolin homology domain-containing protein 2)	1		0.022871	4.52945e-05
AN32A	P39687	P39687	Acidic leucine-rich nuclear phosphoprotein 32 family member A (Acidic nuclear phosphoprotein pp32) (pp32) (Leucine-rich acidic nuclear protein) (LANP) (Mapmodulin) (Potent heat-stable protein phosphatase 2A inhibitor I1PP2A) (Putative HLA-DR-associated protein I) (PHAPI)	1		0.022871	0.000964813
CPIN1	Q6FI81	Q6FI81	Anamorsin (Cytokine-induced apoptosis inhibitor 1) (Fe-S cluster assembly protein DRE2 homolog)	1		0.022871	0.000964813
HMGB1	P09429	P09429	High mobility group protein B1 (High mobility group protein 1) (HMG-1)	1		0.022871	0.000964813
NUCL	P19338	P19338	Nucleolin (Protein C23)	1		0.022871	0.000964813
UBQL1	Q9UMX0	Q9UMX0	Ubiquilin-1 (Protein linking IAP with cytoskeleton 1) (PLIC-1) (hPLIC-1)	1		0.022871	0.000964813
RLA1	P05386	P05386	60S acidic ribosomal protein P1	1		0.022871	0.00571459
SRSF6	Q13247	Q13247	Serine/arginine-rich splicing factor 6 (Pre-mRNA-splicing factor SRP55) (Splicing factor, arginine/serine-rich 6)	1		0.022871	0.022871
PDLI1	O00151	O00151	PDZ and LIM domain protein 1 (C-terminal LIM domain protein 1) (Elfin) (LIM domain protein CLP-36)	1		0.022871	0.212864
AEDO	Q96SZ5	Q96SZ5	2-aminoethanethiol dioxygenase (EC 1.13.11.19) (Cysteamine dioxygenase)	1		0.022871
CATB	P07858	P07858	Cathepsin B (EC 3.4.22.1) (APP secretase) (APPS) (Cathepsin B1) [Cleaved into: Cathepsin B light chain; Cathepsin B heavy chain]	1		0.022871
H13	P16402	P16402	Histone H1.3 (Histone H1c) (Histone H1s-2)	1		0.022871
HMOX1	P09601	P09601	Heme oxygenase 1 (HO-1) (EC 1.14.14.18)	1		0.022871
K2C71	Q3SY84	Q3SY84	Keratin, type II cytoskeletal 71 (Cytokeratin-71) (CK-71) (Keratin-71) (K71) (Type II inner root sheath-specific keratin-K6irs1) (Keratin 6 irs) (hK6irs) (hK6irs1) (Type-II keratin Kb34)	1		0.022871
K2C72	Q14CN4	Q14CN4	Keratin, type II cytoskeletal 72 (Cytokeratin-72) (CK-72) (Keratin-72) (K72) (Type II inner root sheath-specific keratin-K6irs2) (Type-II keratin Kb35)	1		0.022871
PSA2	P25787	P25787	Proteasome subunit alpha type-2 (EC 3.4.25.1) (Macropain subunit C3) (Multicatalytic endopeptidase complex subunit C3) (Proteasome component C3)	1		0.022871
PSA6	P60900	P60900	Proteasome subunit alpha type-6 (EC 3.4.25.1) (27 kDa prosomal protein) (PROS-27) (p27K) (Macropain iota chain) (Multicatalytic endopeptidase complex iota chain) (Proteasome iota chain)	1		0.022871
ICAL	P20810	P20810	Calpastatin (Calpain inhibitor) (Sperm BS-17 component)	1		0.0250457	4.52945e-05
FWCH2	Q96CP2	Q96CP2	FLYWCH family member 2	1		0.0747595	4.52945e-05
HDGF	P51858	P51858	Hepatoma-derived growth factor (HDGF) (High mobility group protein 1-like 2) (HMG-1L2)	1		0.0747595	4.52945e-05
LYRIC	Q86UE4	Q86UE4	Protein LYRIC (3D3/LYRIC) (Astrocyte elevated gene-1 protein) (AEG-1) (Lysine-rich CEACAM1 co-isolated protein) (Metadherin) (Metastasis adhesion protein)	1		0.0747595	4.52945e-05
MA7D2	Q96T17	Q96T17	MAP7 domain-containing protein 2	1		0.0747595	4.52945e-05
UBQL2	Q9UHD9	Q9UHD9	Ubiquilin-2 (Chap1) (DSK2 homolog) (Protein linking IAP with cytoskeleton 2) (PLIC-2) (hPLIC-2) (Ubiquitin-like product Chap1/Dsk2)	1		0.0747595	4.52945e-05
TNIP1	Q15025	Q15025	TNFAIP3-interacting protein 1 (A20-binding inhibitor of NF-kappa-B activation 1) (ABIN-1) (HIV-1 Nef-interacting protein) (Nef-associated factor 1) (Naf1) (Nip40-1) (Virion-associated nuclear shuttling protein) (VAN) (hVAN)	1		0.0747595	0.00571459
HNRPD	Q14103	Q14103	Heterogeneous nuclear ribonucleoprotein D0 (hnRNP D0) (AU-rich element RNA-binding protein 1)	1		0.0977989	0.000964813
LMO7	Q8WWI1	Q8WWI1	LIM domain only protein 7 (LMO-7) (F-box only protein 20) (LOMP)	1		0.212864	4.52945e-05
SPTN1	Q13813	Q13813	Spectrin alpha chain, non-erythrocytic 1 (Alpha-II spectrin) (Fodrin alpha chain) (Spectrin, non-erythroid alpha subunit)	1		0.212864	0.000964813
AFTIN	Q6ULP2	Q6ULP2	Aftiphilin	1			4.52945e-05
AKP13	Q12802	Q12802	A-kinase anchor protein 13 (AKAP-13) (AKAP-Lbc) (Breast cancer nuclear receptor-binding auxiliary protein) (Guanine nucleotide exchange factor Lbc) (Human thyroid-anchoring protein 31) (Lymphoid blast crisis oncogene) (LBC oncogene) (Non-oncogenic Rho GTPase-specific GTP exchange factor) (Protein kinase A-anchoring protein 13) (PRKA13) (p47)	1			4.52945e-05
AKTS1	Q96B36	Q96B36	Proline-rich AKT1 substrate 1 (40 kDa proline-rich AKT substrate)	1			4.52945e-05
ATX2	Q99700	Q99700	Ataxin-2 (Spinocerebellar ataxia type 2 protein) (Trinucleotide repeat-containing gene 13 protein)	1			4.52945e-05
BAG2	O95816	O95816	BAG family molecular chaperone regulator 2 (BAG-2) (Bcl-2-associated athanogene 2)	1			4.52945e-05
BD1L1	Q8NFC6	Q8NFC6	Biorientation of chromosomes in cell division protein 1-like 1	1			4.52945e-05
CCD86	Q9H6F5	Q9H6F5	Coiled-coil domain-containing protein 86 (Cytokine-induced protein with coiled-coil domain)	1			4.52945e-05
CHM4B	Q9H444	Q9H444	Charged multivesicular body protein 4b (Chromatin-modifying protein 4b) (CHMP4b) (SNF7 homolog associated with Alix 1) (SNF7-2) (hSnf7-2) (Vacuolar protein sorting-associated protein 32-2) (Vps32-2) (hVps32-2)	1			4.52945e-05
CNN2	Q99439	Q99439	Calponin-2 (Calponin H2, smooth muscle) (Neutral calponin)	1			4.52945e-05
COBL	O75128	O75128	Protein cordon-bleu	1			4.52945e-05
DAB2	P98082	P98082	Disabled homolog 2 (Adaptor molecule disabled-2) (Differentially expressed in ovarian carcinoma 2) (DOC-2) (Differentially-expressed protein 2)	1			4.52945e-05
DFFA	O00273	O00273	DNA fragmentation factor subunit alpha (DNA fragmentation factor 45 kDa subunit) (DFF-45) (Inhibitor of CAD) (ICAD)	1			4.52945e-05
DIDO1	Q9BTC0	Q9BTC0	Death-inducer obliterator 1 (DIO-1) (hDido1) (Death-associated transcription factor 1) (DATF-1)	1			4.52945e-05
DNJC9	Q8WXX5	Q8WXX5	DnaJ homolog subfamily C member 9 (HDJC9) (DnaJ protein SB73)	1			4.52945e-05
HCFC1	P51610	P51610	Host cell factor 1 (HCF) (HCF-1) (C1 factor) (CFF) (VCAF) (VP16 accessory protein) [Cleaved into: HCF N-terminal chain 1; HCF N-terminal chain 2; HCF N-terminal chain 3; HCF N-terminal chain 4; HCF N-terminal chain 5; HCF N-terminal chain 6; HCF C-terminal chain 1; HCF C-terminal chain 2; HCF C-terminal chain 3; HCF C-terminal chain 4; HCF C-terminal chain 5; HCF C-terminal chain 6]	1			4.52945e-05
HNRPK	P61978	P61978	Heterogeneous nuclear ribonucleoprotein K (hnRNP K) (Transformation up-regulated nuclear protein) (TUNP)	1			4.52945e-05
HOOK3	Q86VS8	Q86VS8	Protein Hook homolog 3 (h-hook3) (hHK3)	1			4.52945e-05
IPP2	P41236	P41236	Protein phosphatase inhibitor 2 (IPP-2)	1			4.52945e-05
JIP4	O60271	O60271	C-Jun-amino-terminal kinase-interacting protein 4 (JIP-4) (JNK-interacting protein 4) (Cancer/testis antigen 89) (CT89) (Human lung cancer oncogene 6 protein) (HLC-6) (JNK-associated leucine-zipper protein) (JLP) (Mitogen-activated protein kinase 8-interacting protein 4) (Proliferation-inducing protein 6) (Protein highly expressed in testis) (PHET) (Sperm surface protein) (Sperm-associated antige…	1			4.52945e-05
K1C19	P08727	P08727	Keratin, type I cytoskeletal 19 (Cytokeratin-19) (CK-19) (Keratin-19) (K19)	1			4.52945e-05
KI67	P46013	P46013	Proliferation marker protein Ki-67 (Antigen identified by monoclonal antibody Ki-67) (Antigen KI-67) (Antigen Ki67)	1			4.52945e-05
KRT85	P78386	P78386	Keratin, type II cuticular Hb5 (Hair keratin K2.12) (Keratin-85) (K85) (Type II hair keratin Hb5) (Type-II keratin Kb25)	1			4.52945e-05
LAP2B	P42167	P42167	Lamina-associated polypeptide 2, isoforms beta/gamma (Thymopoietin, isoforms beta/gamma) (TP beta/gamma) (Thymopoietin-related peptide isoforms beta/gamma) (TPRP isoforms beta/gamma) [Cleaved into: Thymopoietin (TP) (Splenin); Thymopentin (TP5)]	1			4.52945e-05
LAR4B	Q92615	Q92615	La-related protein 4B (La ribonucleoprotein domain family member 4B) (La ribonucleoprotein domain family member 5) (La-related protein 5)	1			4.52945e-05
LIMA1	Q9UHB6	Q9UHB6	LIM domain and actin-binding protein 1 (Epithelial protein lost in neoplasm)	1			4.52945e-05
MAVS	Q7Z434	Q7Z434	Mitochondrial antiviral-signaling protein (MAVS) (CARD adapter inducing interferon beta) (Cardif) (Interferon beta promoter stimulator protein 1) (IPS-1) (Putative NF-kappa-B-activating protein 031N) (Virus-induced-signaling adapter) (VISA)	1			4.52945e-05
MEA1	Q16626	Q16626	Male-enhanced antigen 1 (MEA-1)	1			4.52945e-05
MIF	P14174	P14174	Macrophage migration inhibitory factor (MIF) (EC 5.3.2.1) (Glycosylation-inhibiting factor) (GIF) (L-dopachrome isomerase) (L-dopachrome tautomerase) (EC 5.3.3.12) (Phenylpyruvate tautomerase)	1			4.52945e-05
NEMO	Q9Y6K9	Q9Y6K9	NF-kappa-B essential modulator (NEMO) (FIP-3) (IkB kinase-associated protein 1) (IKKAP1) (Inhibitor of nuclear factor kappa-B kinase subunit gamma) (I-kappa-B kinase subunit gamma) (IKK-gamma) (IKKG) (IkB kinase subunit gamma) (NF-kappa-B essential modifier)	1			4.52945e-05
NOL3	O60936	O60936	Nucleolar protein 3 (Apoptosis repressor with CARD) (Muscle-enriched cytoplasmic protein) (Myp) (Nucleolar protein of 30 kDa) (Nop30)	1			4.52945e-05
NP1L4	Q99733	Q99733	Nucleosome assembly protein 1-like 4 (Nucleosome assembly protein 2) (NAP-2)	1			4.52945e-05
NU153	P49790	P49790	Nuclear pore complex protein Nup153 (153 kDa nucleoporin) (Nucleoporin Nup153)	1			4.52945e-05
NUMA1	Q14980	Q14980	Nuclear mitotic apparatus protein 1 (NuMA protein) (Nuclear matrix protein-22) (NMP-22) (SP-H antigen)	1			4.52945e-05
PACN2	Q9UNF0	Q9UNF0	Protein kinase C and casein kinase substrate in neurons protein 2 (Syndapin-2) (Syndapin-II)	1			4.52945e-05
PALLD	Q8WX93	Q8WX93	Palladin (SIH002) (Sarcoma antigen NY-SAR-77)	1			4.52945e-05
PALMD	Q9NP74	Q9NP74	Palmdelphin (Paralemmin-like protein)	1			4.52945e-05
PEPL	O60437	O60437	Periplakin (190 kDa paraneoplastic pemphigus antigen) (195 kDa cornified envelope precursor protein)	1			4.52945e-05
PEX14	O75381	O75381	Peroxisomal membrane protein PEX14 (PTS1 receptor-docking protein) (Peroxin-14) (Peroxisomal membrane anchor protein PEX14)	1			4.52945e-05
PHAR4	Q8IZ21	Q8IZ21	Phosphatase and actin regulator 4	1			4.52945e-05
PHLB2	Q86SQ0	Q86SQ0	Pleckstrin homology-like domain family B member 2 (Protein LL5-beta)	1			4.52945e-05
PPIA	P62937	P62937	Peptidyl-prolyl cis-trans isomerase A (PPIase A) (EC 5.2.1.8) (Cyclophilin A) (Cyclosporin A-binding protein) (Rotamase A) [Cleaved into: Peptidyl-prolyl cis-trans isomerase A, N-terminally processed]	1			4.52945e-05
PPR18	Q6NYC8	Q6NYC8	Phostensin (Protein phosphatase 1 F-actin cytoskeleton-targeting subunit) (Protein phosphatase 1 regulatory subunit 18)	1			4.52945e-05
PRC2A	P48634	P48634	Protein PRRC2A (HLA-B-associated transcript 2) (Large proline-rich protein BAT2) (Proline-rich and coiled-coil-containing protein 2A) (Protein G2)	1			4.52945e-05
RS12	P25398	P25398	40S ribosomal protein S12	1			4.52945e-05
RS21	P63220	P63220	40S ribosomal protein S21	1			4.52945e-05
SH3G1	Q99961	Q99961	Endophilin-A2 (EEN fusion partner of MLL) (Endophilin-2) (Extra eleven-nineteen leukemia fusion gene protein) (EEN) (SH3 domain protein 2B) (SH3 domain-containing GRB2-like protein 1)	1			4.52945e-05
SLAI2	Q9P270	Q9P270	SLAIN motif-containing protein 2	1			4.52945e-05
SMAP	O00193	O00193	Small acidic protein	1			4.52945e-05
SNP23	O00161	O00161	Synaptosomal-associated protein 23 (SNAP-23) (Vesicle-membrane fusion protein SNAP-23)	1			4.52945e-05
SSFA2	P28290	P28290	Sperm-specific antigen 2 (Cleavage signal-1 protein) (CS-1) (Ki-ras-induced actin-interacting protein)	1			4.52945e-05
STAM1	Q92783	Q92783	Signal transducing adapter molecule 1 (STAM-1)	1			4.52945e-05
SVIL	O95425	O95425	Supervillin (Archvillin) (p205/p250)	1			4.52945e-05
T22D1	Q15714	Q15714	TSC22 domain family protein 1 (Cerebral protein 2) (Regulatory protein TSC-22) (TGFB-stimulated clone 22 homolog) (Transforming growth factor beta-1-induced transcript 4 protein)	1			4.52945e-05
TUFT1	Q9NNX1	Q9NNX1	Tuftelin	1			4.52945e-05
TXLNA	P40222	P40222	Alpha-taxilin	1			4.52945e-05
UBXN1	Q04323	Q04323	UBX domain-containing protein 1 (SAPK substrate protein 1) (UBA/UBX 33.3 kDa protein)	1			4.52945e-05
YLPM1	P49750	P49750	YLP motif-containing protein 1 (Nuclear protein ZAP3) (ZAP113)	1			4.52945e-05
ZCCHV	Q7Z2W4	Q7Z2W4	Zinc finger CCCH-type antiviral protein 1 (ADP-ribosyltransferase diphtheria toxin-like 13) (ARTD13) (Zinc finger CCCH domain-containing protein 2) (Zinc finger antiviral protein) (ZAP)	1			4.52945e-05
ZFR	Q96KR1	Q96KR1	Zinc finger RNA-binding protein (hZFR) (M-phase phosphoprotein homolog)	1			4.52945e-05
ZYX	Q15942	Q15942	Zyxin (Zyxin-2)	1			4.52945e-05
ANLN	Q9NQW6	Q9NQW6	Anillin	1			0.000964813
ARFG3	Q9NP61	Q9NP61	ADP-ribosylation factor GTPase-activating protein 3 (ARF GAP 3)	1			0.000964813
BORG4	Q9H3Q1	Q9H3Q1	Cdc42 effector protein 4 (Binder of Rho GTPases 4)	1			0.000964813
BSDC1	Q9NW68	Q9NW68	BSD domain-containing protein 1	1			0.000964813
CDD	P32320	P32320	Cytidine deaminase (EC 3.5.4.5) (Cytidine aminohydrolase)	1			0.000964813
CH033	Q9H7E9	Q9H7E9	UPF0488 protein C8orf33	1			0.000964813
CIP4	Q15642	Q15642	Cdc42-interacting protein 4 (Protein Felic) (Salt tolerant protein) (hSTP) (Thyroid receptor-interacting protein 10) (TR-interacting protein 10) (TRIP-10)	1			0.000964813
CNBP	P62633	P62633	Cellular nucleic acid-binding protein (CNBP) (Zinc finger protein 9)	1			0.000964813
CS043	Q9BQ61	Q9BQ61	Uncharacterized protein C19orf43	1			0.000964813
CTND1	O60716	O60716	Catenin delta-1 (Cadherin-associated Src substrate) (CAS) (p120 catenin) (p120(ctn)) (p120(cas))	1			0.000964813
DAG1	Q14118	Q14118	Dystroglycan (Dystrophin-associated glycoprotein 1) [Cleaved into: Alpha-dystroglycan (Alpha-DG); Beta-dystroglycan (Beta-DG)]	1			0.000964813
DCTP1	Q9H773	Q9H773	dCTP pyrophosphatase 1 (EC 3.6.1.12) (Deoxycytidine-triphosphatase 1) (dCTPase 1) (RS21C6) (XTP3-transactivated gene A protein)	1			0.000964813
E41L2	O43491	O43491	Band 4.1-like protein 2 (Generally expressed protein 4.1) (4.1G)	1			0.000964813
IASPP	Q8WUF5	Q8WUF5	RelA-associated inhibitor (Inhibitor of ASPP protein) (Protein iASPP) (NFkB-interacting protein 1) (PPP1R13B-like protein)	1			0.000964813
IDHC	O75874	O75874	Isocitrate dehydrogenase [NADP] cytoplasmic (IDH) (EC 1.1.1.42) (Cytosolic NADP-isocitrate dehydrogenase) (IDP) (NADP(+)-specific ICDH) (Oxalosuccinate decarboxylase)	1			0.000964813
IRS2	Q9Y4H2	Q9Y4H2	Insulin receptor substrate 2 (IRS-2)	1			0.000964813
KLC1	Q07866	Q07866	Kinesin light chain 1 (KLC 1)	1			0.000964813
KRT84	Q9NSB2	Q9NSB2	Keratin, type II cuticular Hb4 (Keratin-84) (K84) (Type II hair keratin Hb4) (Type-II keratin Kb24)	1			0.000964813
L1CAM	P32004	P32004	Neural cell adhesion molecule L1 (N-CAM-L1) (NCAM-L1) (CD antigen CD171)	1			0.000964813
LBR	Q14739	Q14739	Lamin-B receptor (Integral nuclear envelope inner membrane protein) (LMN2R)	1			0.000964813
LTOR1	Q6IAA8	Q6IAA8	Ragulator complex protein LAMTOR1 (Late endosomal/lysosomal adaptor and MAPK and MTOR activator 1) (Lipid raft adaptor protein p18) (Protein associated with DRMs and endosomes) (p27Kip1-releasing factor from RhoA) (p27RF-Rho)	1			0.000964813
LUZP1	Q86V48	Q86V48	Leucine zipper protein 1	1			0.000964813
LYSM2	Q8IV50	Q8IV50	LysM and putative peptidoglycan-binding domain-containing protein 2	1			0.000964813
MA7D1	Q3KQU3	Q3KQU3	MAP7 domain-containing protein 1 (Arginine/proline-rich coiled-coil domain-containing protein 1) (Proline/arginine-rich coiled-coil domain-containing protein 1)	1			0.000964813
MCRI2	Q9BUT9	Q9BUT9	MAPK regulated corepressor interacting protein 2 (Protein FAM195A)	1			0.000964813
MTAP2	P11137	P11137	Microtubule-associated protein 2 (MAP-2)	1			0.000964813
NECT3	Q9NQS3	Q9NQS3	Nectin-3 (CDw113) (Nectin cell adhesion molecule 3) (Poliovirus receptor-related protein 3) (CD antigen CD113)	1			0.000964813
NEST	P48681	P48681	Nestin	1			0.000964813
NUP50	Q9UKX7	Q9UKX7	Nuclear pore complex protein Nup50 (50 kDa nucleoporin) (Nuclear pore-associated protein 60 kDa-like) (Nucleoporin Nup50)	1			0.000964813
NXP20	Q8IWE2	Q8IWE2	Protein NOXP20 (Nervous system overexpressed protein 20) (Protein FAM114A1)	1			0.000964813
NYAP2	Q9P242	Q9P242	Neuronal tyrosine-phosphorylated phosphoinositide-3-kinase adapter 2	1			0.000964813
PAIP1	Q9H074	Q9H074	Polyadenylate-binding protein-interacting protein 1 (PABP-interacting protein 1) (PAIP-1) (Poly(A)-binding protein-interacting protein 1)	1			0.000964813
PCCA	P05165	P05165	Propionyl-CoA carboxylase alpha chain, mitochondrial (PCCase subunit alpha) (EC 6.4.1.3) (Propanoyl-CoA:carbon dioxide ligase subunit alpha)	1			0.000964813
PDLI5	Q96HC4	Q96HC4	PDZ and LIM domain protein 5 (Enigma homolog) (Enigma-like PDZ and LIM domains protein)	1			0.000964813
PEF1	Q9UBV8	Q9UBV8	Peflin (PEF protein with a long N-terminal hydrophobic domain) (Penta-EF hand domain-containing protein 1)	1			0.000964813
PUM1	Q14671	Q14671	Pumilio homolog 1 (HsPUM) (Pumilio-1)	1			0.000964813
RIF1	Q5UIP0	Q5UIP0	Telomere-associated protein RIF1 (Rap1-interacting factor 1 homolog)	1			0.000964813
S10AA	P60903	P60903	Protein S100-A10 (Calpactin I light chain) (Calpactin-1 light chain) (Cellular ligand of annexin II) (S100 calcium-binding protein A10) (p10 protein) (p11)	1			0.000964813
S7A6O	Q96CW6	Q96CW6	Probable RNA polymerase II nuclear localization protein SLC7A6OS (ADAMS proteinase-related protein) (Solute carrier family 7 member 6 opposite strand transcript)	1			0.000964813
SAHH	P23526	P23526	Adenosylhomocysteinase (AdoHcyase) (EC 3.3.1.1) (S-adenosyl-L-homocysteine hydrolase)	1			0.000964813
SELS	Q9BQE4	Q9BQE4	Selenoprotein S (SelS) (VCP-interacting membrane protein)	1			0.000964813
SF01	Q15637	Q15637	Splicing factor 1 (Mammalian branch point-binding protein) (BBP) (mBBP) (Transcription factor ZFM1) (Zinc finger gene in MEN1 locus) (Zinc finger protein 162)	1			0.000964813
SPAG7	O75391	O75391	Sperm-associated antigen 7	1			0.000964813
SRA1	Q9HD15	Q9HD15	Steroid receptor RNA activator 1 (Steroid receptor RNA activator protein) (SRAP)	1			0.000964813
TACC1	O75410	O75410	Transforming acidic coiled-coil-containing protein 1 (Gastric cancer antigen Ga55) (Taxin-1)	1			0.000964813
TFG	Q92734	Q92734	Protein TFG (TRK-fused gene protein)	1			0.000964813
TNR6B	Q9UPQ9	Q9UPQ9	Trinucleotide repeat-containing gene 6B protein	1			0.000964813
TPD52	P55327	P55327	Tumor protein D52 (Protein N8)	1			0.000964813
VASP	P50552	P50552	Vasodilator-stimulated phosphoprotein (VASP)	1			0.000964813
WASH6	Q9NQA3	Q9NQA3	WAS protein family homolog 6 (Protein FAM39A)	1			0.000964813
WDR44	Q5JSH3	Q5JSH3	WD repeat-containing protein 44 (Rabphilin-11)	1			0.000964813
CD63	P08962	P08962	CD63 antigen (Granulophysin) (Lysosomal-associated membrane protein 3) (LAMP-3) (Melanoma-associated antigen ME491) (OMA81H) (Ocular melanoma-associated antigen) (Tetraspanin-30) (Tspan-30) (CD antigen CD63)	1			0.00571459				16410552
AL1A3	P47895	P47895	Aldehyde dehydrogenase family 1 member A3 (EC 1.2.1.5) (Aldehyde dehydrogenase 6) (Retinaldehyde dehydrogenase 3) (RALDH-3) (RalDH3)	1			0.00571459
APC	P25054	P25054	Adenomatous polyposis coli protein (Protein APC) (Deleted in polyposis 2.5)	1			0.00571459
CAMP2	Q08AD1	Q08AD1	Calmodulin-regulated spectrin-associated protein 2 (Calmodulin-regulated spectrin-associated protein 1-like protein 1)	1			0.00571459
CASC3	O15234	O15234	Protein CASC3 (Cancer susceptibility candidate gene 3 protein) (Metastatic lymph node gene 51 protein) (MLN 51) (Protein barentsz) (Btz)	1			0.00571459
CCDC6	Q16204	Q16204	Coiled-coil domain-containing protein 6 (Papillary thyroid carcinoma-encoded protein) (Protein H4)	1			0.00571459
CD81	P60033	P60033	CD81 antigen (26 kDa cell surface protein TAPA-1) (Target of the antiproliferative antibody 1) (Tetraspanin-28) (Tspan-28) (CD antigen CD81)	1			0.00571459
CQ059	Q96GS4	Q96GS4	BLOC-1-related complex subunit 6 (Lysosome-dispersing protein) (Lyspersin)	1			0.00571459
CUTA	O60888	O60888	Protein CutA (Acetylcholinesterase-associated protein) (Brain acetylcholinesterase putative membrane anchor)	1			0.00571459
DDX3X	O00571	O00571	ATP-dependent RNA helicase DDX3X (EC 3.6.4.13) (DEAD box protein 3, X-chromosomal) (DEAD box, X isoform) (Helicase-like protein 2) (HLP2)	1			0.00571459
DEK	P35659	P35659	Protein DEK	1			0.00571459
FBP1L	Q5T0N5	Q5T0N5	Formin-binding protein 1-like (Transducer of Cdc42-dependent actin assembly protein 1) (Toca-1)	1			0.00571459
FNBP4	Q8N3X1	Q8N3X1	Formin-binding protein 4 (Formin-binding protein 30)	1			0.00571459
FRIH	P02794	P02794	Ferritin heavy chain (Ferritin H subunit) (EC 1.16.3.1) (Cell proliferation-inducing gene 15 protein) [Cleaved into: Ferritin heavy chain, N-terminally processed]	1			0.00571459
G3BP2	Q9UN86	Q9UN86	Ras GTPase-activating protein-binding protein 2 (G3BP-2) (GAP SH3 domain-binding protein 2)	1			0.00571459
PFD3	P61758	P61758	Prefoldin subunit 3 (HIBBJ46) (Von Hippel-Lindau-binding protein 1) (VBP-1) (VHL-binding protein 1)	1			0.00571459
PFD4	Q9NQP4	Q9NQP4	Prefoldin subunit 4 (Protein C-1)	1			0.00571459
PRC2B	Q5JSZ5	Q5JSZ5	Protein PRRC2B (HLA-B-associated transcript 2-like 1) (Proline-rich coiled-coil protein 2B)	1			0.00571459
PSME1	Q06323	Q06323	Proteasome activator complex subunit 1 (11S regulator complex subunit alpha) (REG-alpha) (Activator of multicatalytic protease subunit 1) (Interferon gamma up-regulated I-5111 protein) (IGUP I-5111) (Proteasome activator 28 subunit alpha) (PA28a) (PA28alpha)	1			0.00571459
PSME2	Q9UL46	Q9UL46	Proteasome activator complex subunit 2 (11S regulator complex subunit beta) (REG-beta) (Activator of multicatalytic protease subunit 2) (Proteasome activator 28 subunit beta) (PA28b) (PA28beta)	1			0.00571459
RBM27	Q9P2N5	Q9P2N5	RNA-binding protein 27 (RNA-binding motif protein 27)	1			0.00571459
RBM3	P98179	P98179	RNA-binding protein 3 (RNA-binding motif protein 3) (RNPL)	1			0.00571459
RIOK3	O14730	O14730	Serine/threonine-protein kinase RIO3 (EC 2.7.11.1) (RIO kinase 3) (sudD homolog)	1			0.00571459
SKA3	Q8IX90	Q8IX90	Spindle and kinetochore-associated protein 3	1			0.00571459
SSRA	P43307	P43307	Translocon-associated protein subunit alpha (TRAP-alpha) (Signal sequence receptor subunit alpha) (SSR-alpha)	1			0.00571459
TACC2	O95359	O95359	Transforming acidic coiled-coil-containing protein 2 (Anti-Zuai-1) (AZU-1)	1			0.00571459
TENS4	Q8IZW8	Q8IZW8	Tensin-4 (C-terminal tensin-like protein)	1			0.00571459
TP53B	Q12888	Q12888	Tumor suppressor p53-binding protein 1 (53BP1) (p53-binding protein 1) (p53BP1)	1			0.00571459
UBE2H	P62256	P62256	Ubiquitin-conjugating enzyme E2 H (EC 2.3.2.23) ((E3-independent) E2 ubiquitin-conjugating enzyme H) (EC 2.3.2.24) (E2 ubiquitin-conjugating enzyme H) (UbcH2) (Ubiquitin carrier protein H) (Ubiquitin-conjugating enzyme E2-20K) (Ubiquitin-protein ligase H)	1			0.00571459
YAP1	P46937	P46937	Transcriptional coactivator YAP1 (Yes-associated protein 1) (Protein yorkie homolog) (Yes-associated protein YAP65 homolog)	1			0.00571459
ZFY16	Q7Z3T8	Q7Z3T8	Zinc finger FYVE domain-containing protein 16 (Endofin) (Endosome-associated FYVE domain protein)	1			0.00571459
ACAP1	Q15027	Q15027	Arf-GAP with coiled-coil, ANK repeat and PH domain-containing protein 1 (Centaurin-beta-1) (Cnt-b1)	1			0.022871
AGFG1	P52594	P52594	Arf-GAP domain and FG repeat-containing protein 1 (HIV-1 Rev-binding protein) (Nucleoporin-like protein RIP) (Rev-interacting protein) (Rev/Rex activation domain-binding protein)	1			0.022871
AKAP2	Q9Y2D5	Q9Y2D5	A-kinase anchor protein 2 (AKAP-2) (AKAP-KL) (Protein kinase A-anchoring protein 2) (PRKA2)	1			0.022871
ALAT1	P24298	P24298	Alanine aminotransferase 1 (ALT1) (EC 2.6.1.2) (Glutamate pyruvate transaminase 1) (GPT 1) (Glutamic--alanine transaminase 1) (Glutamic--pyruvic transaminase 1)	1			0.022871
AN32E	Q9BTT0	Q9BTT0	Acidic leucine-rich nuclear phosphoprotein 32 family member E (LANP-like protein) (LANP-L)	1			0.022871
AP1AR	Q63HQ0	Q63HQ0	AP-1 complex-associated regulatory protein (2c18) (Adaptor-related protein complex 1-associated regulatory protein) (Gamma-1-adaptin brefeldin A resistance protein) (GBAR) (Gamma-BAR) (Gamma-A1-adaptin and kinesin interactor) (Gadkin)	1			0.022871
ARFG2	Q8N6H7	Q8N6H7	ADP-ribosylation factor GTPase-activating protein 2 (ARF GAP 2) (GTPase-activating protein ZNF289) (Zinc finger protein 289)	1			0.022871
ARPC5	O15511	O15511	Actin-related protein 2/3 complex subunit 5 (Arp2/3 complex 16 kDa subunit) (p16-ARC)	1			0.022871
AT12A	P54707	P54707	Potassium-transporting ATPase alpha chain 2 (EC 3.6.3.10) (Non-gastric H(+)/K(+) ATPase subunit alpha) (Proton pump)	1			0.022871
BTF3	P20290	P20290	Transcription factor BTF3 (Nascent polypeptide-associated complex subunit beta) (NAC-beta) (RNA polymerase B transcription factor 3)	1			0.022871
CA174	Q8IYL3	Q8IYL3	UPF0688 protein C1orf174	1			0.022871
COX17	Q14061	Q14061	Cytochrome c oxidase copper chaperone	1			0.022871
DLDH	P09622	P09622	Dihydrolipoyl dehydrogenase, mitochondrial (EC 1.8.1.4) (Dihydrolipoamide dehydrogenase) (Glycine cleavage system L protein)	1			0.022871
ENDD1	O94919	O94919	Endonuclease domain-containing 1 protein (EC 3.1.30.-)	1			0.022871
F120A	Q9NZB2	Q9NZB2	Constitutive coactivator of PPAR-gamma-like protein 1 (Oxidative stress-associated Src activator) (Protein FAM120A)	1			0.022871
FKBP3	Q00688	Q00688	Peptidyl-prolyl cis-trans isomerase FKBP3 (PPIase FKBP3) (EC 5.2.1.8) (25 kDa FK506-binding protein) (25 kDa FKBP) (FKBP-25) (FK506-binding protein 3) (FKBP-3) (Immunophilin FKBP25) (Rapamycin-selective 25 kDa immunophilin) (Rotamase)	1			0.022871
FNBP1	Q96RU3	Q96RU3	Formin-binding protein 1 (Formin-binding protein 17) (hFBP17)	1			0.022871
GFAP	P14136	P14136	Glial fibrillary acidic protein (GFAP)	1			0.022871
GPTC8	Q9UKJ3	Q9UKJ3	G patch domain-containing protein 8	1			0.022871
HMGB2	P26583	P26583	High mobility group protein B2 (High mobility group protein 2) (HMG-2)	1			0.022871
HNRH1	P31943	P31943	Heterogeneous nuclear ribonucleoprotein H (hnRNP H) [Cleaved into: Heterogeneous nuclear ribonucleoprotein H, N-terminally processed]	1			0.022871
IGJ	P01591	P01591	Immunoglobulin J chain (Joining chain of multimeric IgA and IgM)	1			0.022871
MOFA1	Q9Y605	Q9Y605	MORF4 family-associated protein 1 (Protein PGR1) (Protein associated with MRG of 14 kDa)	1			0.022871
NUDT5	Q9UKK9	Q9UKK9	ADP-sugar pyrophosphatase (EC 3.6.1.13) (8-oxo-dGDP phosphatase) (EC 3.6.1.58) (Nuclear ATP-synthesis protein NUDIX5) (EC 2.7.7.-) (Nucleoside diphosphate-linked moiety X motif 5) (Nudix motif 5) (hNUDT5) (YSA1H)	1			0.022871
PCBP2	Q15366	Q15366	Poly(rC)-binding protein 2 (Alpha-CP2) (Heterogeneous nuclear ribonucleoprotein E2) (hnRNP E2)	1			0.022871
PLK1	P53350	P53350	Serine/threonine-protein kinase PLK1 (EC 2.7.11.21) (Polo-like kinase 1) (PLK-1) (Serine/threonine-protein kinase 13) (STPK13)	1			0.022871
PP4R2	Q9NY27	Q9NY27	Serine/threonine-protein phosphatase 4 regulatory subunit 2	1			0.022871
PSB4	P28070	P28070	Proteasome subunit beta type-4 (EC 3.4.25.1) (26 kDa prosomal protein) (HsBPROS26) (PROS-26) (Macropain beta chain) (Multicatalytic endopeptidase complex beta chain) (Proteasome beta chain) (Proteasome chain 3) (HsN3)	1			0.022871
PSMD4	P55036	P55036	26S proteasome non-ATPase regulatory subunit 4 (26S proteasome regulatory subunit RPN10) (26S proteasome regulatory subunit S5A) (Antisecretory factor 1) (AF) (ASF) (Multiubiquitin chain-binding protein)	1			0.022871
RRP15	Q9Y3B9	Q9Y3B9	RRP15-like protein (Ribosomal RNA-processing protein 15)	1			0.022871
RS20	P60866	P60866	40S ribosomal protein S20	1			0.022871
RS5	P46782	P46782	40S ribosomal protein S5 [Cleaved into: 40S ribosomal protein S5, N-terminally processed]	1			0.022871
RS6	P62753	P62753	40S ribosomal protein S6 (Phosphoprotein NP33)	1			0.022871
SKP1	P63208	P63208	S-phase kinase-associated protein 1 (Cyclin-A/CDK2-associated protein p19) (p19A) (Organ of Corti protein 2) (OCP-2) (Organ of Corti protein II) (OCP-II) (RNA polymerase II elongation factor-like protein) (SIII) (Transcription elongation factor B polypeptide 1-like) (p19skp1)	1			0.022871
SRP14	P37108	P37108	Signal recognition particle 14 kDa protein (SRP14) (18 kDa Alu RNA-binding protein)	1			0.022871
TOIP1	Q5JTV8	Q5JTV8	Torsin-1A-interacting protein 1 (Lamin-associated protein 1B) (LAP1B)	1			0.022871
TRI29	Q14134	Q14134	Tripartite motif-containing protein 29 (Ataxia telangiectasia group D-associated protein)	1			0.022871
VSIG8	Q5VU13	Q5VU13	V-set and immunoglobulin domain-containing protein 8	1			0.022871
ZN185	O15231	O15231	Zinc finger protein 185 (LIM domain protein ZNF185) (P1-A)	1			0.022871
ZO1	Q07157	Q07157	Tight junction protein ZO-1 (Tight junction protein 1) (Zona occludens protein 1) (Zonula occludens protein 1)	1			0.022871
PIK3R2	O00459	O00459	Phosphatidylinositol 3-kinase regulatory subunit beta (PI3-kinase regulatory subunit beta) (PI3K regulatory subunit beta) (PtdIns-3-kinase regulatory subunit beta) (Phosphatidylinositol 3-kinase 85 kDa regulatory subunit beta) (PI3-kinase subunit p85-beta) (PtdIns-3-kinase regulatory subunit p85-beta)	1				0.03			28744480
HSPA8	P11142	P11142	Heat shock cognate 71 kDa protein (Heat shock 70 kDa protein 8) (Lipopolysaccharide-associated protein 1) (LAP-1) (LPS-associated protein 1)	1				0			26042774
RAB3D	O95716	O95716	Ras-related protein Rab-3D	1				0			26042774
STIM2	Q9P246	Q9P246	Stromal interaction molecule 2	1				0			26042774
DHCR7	Q9UBM7	Q9UBM7	7-dehydrocholesterol reductase (7-DHC reductase) (EC 1.3.1.21) (Putative sterol reductase SR-2) (Sterol Delta(7)-reductase)	1				0.01			26042774
FIS1	Q9Y3D6	Q9Y3D6	Mitochondrial fission 1 protein (FIS1 homolog) (hFis1) (Tetratricopeptide repeat protein 11) (TPR repeat protein 11)	1				0.03			26042774
SC22B	O75396	O75396	Vesicle-trafficking protein SEC22b (ER-Golgi SNARE of 24 kDa) (ERS-24) (ERS24) (SEC22 vesicle-trafficking protein homolog B) (SEC22 vesicle-trafficking protein-like 1)	1				0.03			26042774
UBXN6	Q9BZV1	Q9BZV1	UBX domain-containing protein 6 (UBX domain-containing protein 1)	1				0.03			26042774
ILK	Q13418	Q13418	Integrin-linked protein kinase (EC 2.7.11.1) (59 kDa serine/threonine-protein kinase) (ILK-1) (ILK-2) (p59ILK)	1				0.04			26042774
YWHAE	P62258	P62258	14-3-3 protein epsilon (14-3-3E)	1				0			25920978
EPHA2	P29317	P29317	Ephrin type-A receptor 2 (EC 2.7.10.1) (Epithelial cell kinase) (Tyrosine-protein kinase receptor ECK)	1				0			25906164
RFIP2	Q7L804	Q7L804	Rab11 family-interacting protein 2 (Rab11-FIP2) (NRip11)	1					0.808268	CT005	23006599
REEP5	Q00765	Q00765	Receptor expression-enhancing protein 5 (Polyposis locus protein 1) (Protein TB2)	1				0			22901061
ACSL3	O95573	O95573	Long-chain-fatty-acid--CoA ligase 3 (EC 6.2.1.3) (Long-chain acyl-CoA synthetase 3) (LACS 3)	1				0			22590624
LPCAT1	Q8NF37	Q8NF37	Lysophosphatidylcholine acyltransferase 1 (LPC acyltransferase 1) (LPCAT-1) (LysoPC acyltransferase 1) (EC 2.3.1.23) (1-acylglycerophosphocholine O-acyltransferase) (1-alkylglycerophosphocholine O-acetyltransferase) (EC 2.3.1.67) (Acetyl-CoA:lyso-platelet-activating factor acetyltransferase) (Acetyl-CoA:lyso-PAF acetyltransferase) (Lyso-PAF acetyltransferase) (LysoPAFAT) (Acyltransferase-like 2) …	1				0.03			22590624
RAB14	P61106	P61106	Ras-related protein Rab-14	1				0			22046472
ARF1	P84077	P84077	ADP-ribosylation factor 1	1					0.564841	CT556	20231409
CD59	P13987	P13987	CD59 glycoprotein (1F5 antigen) (20 kDa homologous restriction factor) (HRF-20) (HRF20) (MAC-inhibitory protein) (MAC-IP) (MEM43 antigen) (Membrane attack complex inhibition factor) (MACIF) (Membrane inhibitor of reactive lysis) (MIRL) (Protectin) (CD antigen CD59)	1				0.03			19168743
KRT18	P05783	P05783	Keratin, type I cytoskeletal 18 (Cell proliferation-inducing gene 46 protein) (Cytokeratin-18) (CK-18) (Keratin-18) (K18)	1				0			18692775
VAMP3	Q15836	Q15836	Vesicle-associated membrane protein 3 (VAMP-3) (Cellubrevin) (CEB) (Synaptobrevin-3)	1				0			18369472
VAMP8	Q9BV40	Q9BV40	Vesicle-associated membrane protein 8 (VAMP-8) (Endobrevin) (EDB)	1				0			18369472
PRKCD	Q05655	Q05655	Protein kinase C delta type (EC 2.7.11.13) (Tyrosine-protein kinase PRKCD) (EC 2.7.10.2) (nPKC-delta) [Cleaved into: Protein kinase C delta type regulatory subunit; Protein kinase C delta type catalytic subunit (Sphingosine-dependent protein kinase-1) (SDK1)]	1				0			15863503
RAB1A	P62820	P62820	Ras-related protein Rab-1A (YPT1-related protein)	1					0.806526	CT229	14500507
RAB11A	P62491	P62491	Ras-related protein Rab-11A (Rab-11) (YL8)	1					0.744986	CT556	14500507
RAB11B	Q15907	Q15907	Ras-related protein Rab-11B (GTP-binding protein YPT3)	1				0			14500507
RAB6A	P20340	P20340	Ras-related protein Rab-6A (Rab-6)	1				0			14500507
ATP2A2	P16615	P16615	Sarcoplasmic/endoplasmic reticulum calcium ATPase 2 (SERCA2) (SR Ca(2+)-ATPase 2) (EC 3.6.3.8) (Calcium pump 2) (Calcium-transporting ATPase sarcoplasmic reticulum type, slow twitch skeletal muscle isoform) (Endoplasmic reticulum class 1/2 Ca(2+) ATPase)	1				0			9841902
CSK22	P19784	P19784	Casein kinase II subunit alpha' (CK II alpha') (EC 2.7.11.1)	1					0.999608	CT005
TMED1	Q13445	Q13445	Transmembrane emp24 domain-containing protein 1 (Interleukin-1 receptor-like 1 ligand) (Putative T1/ST2 receptor-binding protein) (p24 family protein gamma-1) (Tp24) (p24gamma1)	1					0.999571	CT005
VANG2	Q9ULK5	Q9ULK5	Vang-like protein 2 (Loop-tail protein 1 homolog) (Strabismus 1) (Van Gogh-like protein 2)	1					0.995156	CT005
VANG1	Q8TAA9	Q8TAA9	Vang-like protein 1 (Loop-tail protein 2 homolog) (LPP2) (Strabismus 2) (Van Gogh-like protein 1)	1					0.993375	CT005
PI42C	Q8TBX8	Q8TBX8	Phosphatidylinositol 5-phosphate 4-kinase type-2 gamma (EC 2.7.1.149) (Phosphatidylinositol 5-phosphate 4-kinase type II gamma) (PI(5)P 4-kinase type II gamma) (PIP4KII-gamma)	1					0.98483	CT005
CSK21	P68400	P68400	Casein kinase II subunit alpha (CK II alpha) (EC 2.7.11.1)	1					0.983378	CT005
AP2M1	Q96CW1	Q96CW1	AP-2 complex subunit mu (AP-2 mu chain) (Adapter-related protein complex 2 mu subunit) (Adaptin-mu2) (Adaptor protein complex AP-2 subunit mu) (Clathrin assembly protein complex 2 medium chain) (Clathrin coat assembly protein AP50) (Clathrin coat-associated protein AP50) (HA2 50 kDa subunit) (Plasma membrane adaptor AP-2 50 kDa protein)	1					0.979306	CT005
AP1M1	Q9BXS5	Q9BXS5	AP-1 complex subunit mu-1 (AP-mu chain family member mu1A) (Adaptor protein complex AP-1 mu-1 subunit) (Adaptor-related protein complex 1 mu-1 subunit) (Clathrin assembly protein complex 1 medium chain 1) (Clathrin coat assembly protein AP47) (Clathrin coat-associated protein AP47) (Golgi adaptor HA1/AP1 adaptin mu-1 subunit) (Mu-adaptin 1) (Mu1A-adaptin)	1					0.978833	CT005
FAK1	Q05397	Q05397	Focal adhesion kinase 1 (FADK 1) (EC 2.7.10.2) (Focal adhesion kinase-related nonkinase) (FRNK) (Protein phosphatase 1 regulatory subunit 71) (PPP1R71) (Protein-tyrosine kinase 2) (p125FAK) (pp125FAK)	1					0.968861	CT005
PI42A	P48426	P48426	Phosphatidylinositol 5-phosphate 4-kinase type-2 alpha (EC 2.7.1.149) (1-phosphatidylinositol 5-phosphate 4-kinase 2-alpha) (Diphosphoinositide kinase 2-alpha) (PIP5KIII) (Phosphatidylinositol 5-phosphate 4-kinase type II alpha) (PI(5)P 4-kinase type II alpha) (PIP4KII-alpha) (PtdIns(4)P-5-kinase B isoform) (PtdIns(4)P-5-kinase C isoform) (PtdIns(5)P-4-kinase isoform 2-alpha)	1					0.967327	CT005
JPH1	Q9HDC5	Q9HDC5	Junctophilin-1 (JP-1) (Junctophilin type 1)	1					0.964943	CT005
M4K4	O95819	O95819	Mitogen-activated protein kinase kinase kinase kinase 4 (EC 2.7.11.1) (HPK/GCK-like kinase HGK) (MAPK/ERK kinase kinase kinase 4) (MEK kinase kinase 4) (MEKKK 4) (Nck-interacting kinase)	1					0.960781	CT005
VRK2	Q86Y07	Q86Y07	Serine/threonine-protein kinase VRK2 (EC 2.7.11.1) (Vaccinia-related kinase 2)	1					0.960781	CT005
AP2A2	O94973	O94973	AP-2 complex subunit alpha-2 (100 kDa coated vesicle protein C) (Adapter-related protein complex 2 alpha-2 subunit) (Adaptor protein complex AP-2 subunit alpha-2) (Alpha-adaptin C) (Alpha2-adaptin) (Clathrin assembly protein complex 2 alpha-C large chain) (Huntingtin yeast partner J) (Huntingtin-interacting protein 9) (HIP-9) (Huntingtin-interacting protein J) (Plasma membrane adaptor HA2/AP2 ada…	1					0.952893	CT005
CSK2B	P67870	P67870	Casein kinase II subunit beta (CK II beta) (Phosvitin) (Protein G5a)	1					0.911903	CT005
TAOK2	Q9UL54	Q9UL54	Serine/threonine-protein kinase TAO2 (EC 2.7.11.1) (Kinase from chicken homolog C) (hKFC-C) (Prostate-derived sterile 20-like kinase 1) (PSK-1) (PSK1) (Prostate-derived STE20-like kinase 1) (Thousand and one amino acid protein kinase 2)	1					0.906739	CT005
HS2ST	Q7LGA3	Q7LGA3	Heparan sulfate 2-O-sulfotransferase 1 (2-O-sulfotransferase) (2OST) (EC 2.8.2.-)	1					0.881728	CT005
MSPD2	Q8NHP6	Q8NHP6	Motile sperm domain-containing protein 2	1					0.873893	CT005
MAGT1	Q9H0U3	Q9H0U3	Magnesium transporter protein 1 (MagT1) (Implantation-associated protein) (IAP)	1					0.848066	CT005
TBL2	Q9Y4P3	Q9Y4P3	Transducin beta-like protein 2 (WS beta-transducin repeats protein) (WS-betaTRP) (Williams-Beuren syndrome chromosomal region 13 protein)	1					0.823839	CT005
MGST3	O14880	O14880	Microsomal glutathione S-transferase 3 (Microsomal GST-3) (EC 2.5.1.18) (Microsomal GST-III)	1					0.81534	CT005
WDR48	Q8TAF3	Q8TAF3	WD repeat-containing protein 48 (USP1-associated factor 1) (WD repeat endosomal protein) (p80)	1					0.81534	CT005
KC1E	P49674	P49674	Casein kinase I isoform epsilon (CKI-epsilon) (CKIe) (EC 2.7.11.1)	1					0.813594	CT005
PCF11	O94913	O94913	Pre-mRNA cleavage complex 2 protein Pcf11 (Pre-mRNA cleavage complex II protein Pcf11)	1					0.813594	CT005
AP3D1	O14617	O14617	AP-3 complex subunit delta-1 (AP-3 complex subunit delta) (Adapter-related protein complex 3 subunit delta-1) (Delta-adaptin)	1					0.812509	CT005
FA13A	O94988	O94988	Protein FAM13A	1					0.812509	CT005
PI42B	P78356	P78356	Phosphatidylinositol 5-phosphate 4-kinase type-2 beta (EC 2.7.1.149) (1-phosphatidylinositol 5-phosphate 4-kinase 2-beta) (Diphosphoinositide kinase 2-beta) (Phosphatidylinositol 5-phosphate 4-kinase type II beta) (PI(5)P 4-kinase type II beta) (PIP4KII-beta) (PtdIns(5)P-4-kinase isoform 2-beta)	1					0.812509	CT005
RABL3	Q5HYI8	Q5HYI8	Rab-like protein 3	1					0.810801	CT005
MSH3	P20585	P20585	DNA mismatch repair protein Msh3 (hMSH3) (Divergent upstream protein) (DUP) (Mismatch repair protein 1) (MRP1)	1					0.808268	CT005
ZFPL1	O95159	O95159	Zinc finger protein-like 1 (Zinc finger protein MCG4)	1					0.808268	CT005
ARRB2	P32121	P32121	Beta-arrestin-2 (Arrestin beta-2)	1					0.804112	CT005
KC1A	P48729	P48729	Casein kinase I isoform alpha (CKI-alpha) (EC 2.7.11.1) (CK1)	1					0.801059	CT005
RFIP5	Q9BXF6	Q9BXF6	Rab11 family-interacting protein 5 (Rab11-FIP5) (Gamma-SNAP-associated factor 1) (Gaf-1) (Phosphoprotein pp75) (Rab11-interacting protein Rip11)	1					0.793649	CT005
EXOC1	Q9NV70	Q9NV70	Exocyst complex component 1 (Exocyst complex component Sec3)	1					0.786512	CT005
DAXX	Q9UER7	Q9UER7	Death domain-associated protein 6 (Daxx) (hDaxx) (ETS1-associated protein 1) (EAP1) (Fas death domain-associated protein)	1					0.786315	CT005
PTSS1	P48651	P48651	Phosphatidylserine synthase 1 (PSS-1) (PtdSer synthase 1) (EC 2.7.8.29) (Serine-exchange enzyme I)	1					0.781778	CT005
TOM6	Q96B49	Q96B49	Mitochondrial import receptor subunit TOM6 homolog (Overexpressed breast tumor protein) (Translocase of outer membrane 6 kDa subunit homolog)	1					0.775758	CT005
AP2A1	O95782	O95782	AP-2 complex subunit alpha-1 (100 kDa coated vesicle protein A) (Adapter-related protein complex 2 alpha-1 subunit) (Adaptor protein complex AP-2 subunit alpha-1) (Alpha-adaptin A) (Alpha1-adaptin) (Clathrin assembly protein complex 2 alpha-A large chain) (Plasma membrane adaptor HA2/AP2 adaptin alpha A subunit)	1					0.760287	CT005
YMEL1	Q96TA2	Q96TA2	ATP-dependent zinc metalloprotease YME1L1 (EC 3.4.24.-) (ATP-dependent metalloprotease FtsH1) (Meg-4) (Presenilin-associated metalloprotease) (PAMP) (YME1-like protein 1)	1					0.721343	CT005
EMC2	Q15006	Q15006	ER membrane protein complex subunit 2 (Tetratricopeptide repeat protein 35) (TPR repeat protein 35)	1					0.631219	CT005
WDR6	Q9NNW5	Q9NNW5	WD repeat-containing protein 6	1					0.680515	CT005, INCE_CHLTR_MS
PTK7	Q13308	Q13308	Inactive tyrosine-protein kinase 7 (Colon carcinoma kinase 4) (CCK-4) (Protein-tyrosine kinase 7) (Pseudo tyrosine kinase receptor 7) (Tyrosine-protein kinase-like 7)	1					0.908721	CT006
CLGN	O14967	O14967	Calmegin	1					0.773185	CT036_52-403, CT058_57-367
ANM2	P55345	P55345	Protein arginine N-methyltransferase 2 (EC 2.1.1.-) (Histone-arginine N-methyltransferase PRMT2) (EC 2.1.1.125)	1					0.996265	CT058_57-367
TM214	Q6NUQ4	Q6NUQ4	Transmembrane protein 214	1					0.982997	CT058_57-367
SEP15	O60613	O60613	15 kDa selenoprotein	1					0.899132	CT058_57-367
PON2	Q15165	Q15165	Serum paraoxonase/arylesterase 2 (PON 2) (EC 3.1.1.2) (EC 3.1.1.81) (Aromatic esterase 2) (A-esterase 2) (Serum aryldialkylphosphatase 2)	1					0.710494	CT058_57-367
TIM8B	Q9Y5J9	Q9Y5J9	Mitochondrial import inner membrane translocase subunit Tim8 B (DDP-like protein) (Deafness dystonia protein 2)	1					0.724086	CT058_57-367, CT195_212-363
TIM8A	O60220	O60220	Mitochondrial import inner membrane translocase subunit Tim8 A (Deafness dystonia protein 1) (X-linked deafness dystonia protein)	1					0.703301	CT058_57-367, CT195_212-363
VATH	Q9UI12	Q9UI12	V-type proton ATPase subunit H (V-ATPase subunit H) (Nef-binding protein 1) (NBP1) (Protein VMA13 homolog) (V-ATPase 50/57 kDa subunits) (Vacuolar proton pump subunit H) (Vacuolar proton pump subunit SFD)	1					0.966704	CT135_57-360
XPO4	Q9C0E2	Q9C0E2	Exportin-4 (Exp4)	1					0.754552	CT135_57-360
PMF1	Q6P1K2	Q6P1K2	Polyamine-modulated factor 1 (PMF-1)	1					0.733022	CT135_57-360
APOA	P08519	P08519	Apolipoprotein(a) (Apo(a)) (Lp(a)) (EC 3.4.21.-)	1					0.925007	CT164
ARP10	Q9NZ32	Q9NZ32	Actin-related protein 10 (Actin-related protein 11) (hARP11)	1					0.994232	CT192
DCTN6	O00399	O00399	Dynactin subunit 6 (Dynactin subunit p27) (Protein WS-3)	1					0.990659	CT192
ACTY	P42025	P42025	Beta-centractin (Actin-related protein 1B) (ARP1B)	1					0.987235	CT192
DCTN5	Q9BTE1	Q9BTE1	Dynactin subunit 5 (Dynactin subunit p25)	1					0.971074	CT192
DCTN3	O75935	O75935	Dynactin subunit 3 (Dynactin complex subunit 22 kDa subunit) (p22)	1					0.937894	CT192
ACTZ	P61163	P61163	Alpha-centractin (Centractin) (ARP1) (Actin-RPV) (Centrosome-associated actin homolog)	1					0.91407	CT192
TWF1	Q12792	Q12792	Twinfilin-1 (Protein A6) (Protein tyrosine kinase 9)	1					0.802894	CT192
UBR2	Q8IWV8	Q8IWV8	E3 ubiquitin-protein ligase UBR2 (EC 6.3.2.-) (N-recognin-2) (Ubiquitin-protein ligase E3-alpha-2) (Ubiquitin-protein ligase E3-alpha-II)	1					0.739528	CT222_89-129
CENPU	Q71F23	Q71F23	Centromere protein U (CENP-U) (Interphase centromere complex protein 24) (KSHV latent nuclear antigen-interacting protein 1) (MLF1-interacting protein) (Polo-box-interacting protein 1) (centromere protein of 50 kDa) (CENP-50)	1					0.712737	CT222_89-129
UBR1	Q8IWV7	Q8IWV7	E3 ubiquitin-protein ligase UBR1 (EC 6.3.2.-) (N-recognin-1) (Ubiquitin-protein ligase E3-alpha-1) (Ubiquitin-protein ligase E3-alpha-I)	1					0.561138	CT222_89-129
YI028	A8MVJ9	A8MVJ9	Putative UPF0609 protein C4orf27-like	1					0.74756	CT224_84-147
RIMB1	O95153	O95153	Peripheral-type benzodiazepine receptor-associated protein 1 (PRAX-1) (Peripheral benzodiazepine receptor-interacting protein) (PBR-IP) (RIMS-binding protein 1) (RIM-BP1)	1					0.865449	CT224_84-147, CT224
CPVL	Q9H3G5	Q9H3G5	Probable serine carboxypeptidase CPVL (EC 3.4.16.-) (Carboxypeptidase, vitellogenic-like) (Vitellogenic carboxypeptidase-like protein) (VCP-like protein) (hVLP)	1					0.846534	CT224_84-147, CT556
RNF12	Q9NVW2	Q9NVW2	E3 ubiquitin-protein ligase RLIM (EC 6.3.2.-) (LIM domain-interacting RING finger protein) (RING finger LIM domain-binding protein) (R-LIM) (RING finger protein 12) (Renal carcinoma antigen NY-REN-43)	1					0.767287	CT227_87-132
KLH26	Q53HC5	Q53HC5	Kelch-like protein 26	1					0.725702	CT228_88-196
CTNA1	P35221	P35221	Catenin alpha-1 (Alpha E-catenin) (Cadherin-associated protein) (Renal carcinoma antigen NY-REN-13)	1					0.648335	CT228_88-196
SCO2	O43819	O43819	Protein SCO2 homolog, mitochondrial	1					0.884153	CT229_93-215
PSF3	Q9BRX5	Q9BRX5	DNA replication complex GINS protein PSF3 (GINS complex subunit 3)	1					0.816208	CT229_93-215
PSF2	Q9Y248	Q9Y248	DNA replication complex GINS protein PSF2 (GINS complex subunit 2)	1					0.808952	CT229_93-215
SLD5	Q9BRT9	Q9BRT9	DNA replication complex GINS protein SLD5 (GINS complex subunit 4) [Cleaved into: DNA replication complex GINS protein SLD5, N-terminally processed]	1					0.808952	CT229_93-215
DIM1	Q9UNQ2	Q9UNQ2	Probable dimethyladenosine transferase (EC 2.1.1.183) (DIM1 dimethyladenosine transferase 1 homolog) (DIM1 dimethyladenosine transferase 1-like) (Probable 18S rRNA (adenine(1779)-N(6)/adenine(1780)-N(6))-dimethyltransferase) (Probable 18S rRNA dimethylase) (Probable S-adenosylmethionine-6-N',N'-adenosyl(rRNA) dimethyltransferase)	1					0.715268	CT229_93-215
I20L2	Q9H9L3	Q9H9L3	Interferon-stimulated 20 kDa exonuclease-like 2 (EC 3.1.-.-)	1					0.715268	CT229_93-215
PSF1	Q14691	Q14691	DNA replication complex GINS protein PSF1 (GINS complex subunit 1)	1					0.657537	CT229_93-215
IMA1	P52294	P52294	Importin subunit alpha-1 (Karyopherin subunit alpha-1) (Nucleoprotein interactor 1) (NPI-1) (RAG cohort protein 2) (SRP1-beta)	1					0.584707	CT229_93-215
5NT3	Q9H0P0	Q9H0P0	Cytosolic 5'-nucleotidase 3 (EC 3.1.3.5) (Cytosolic 5'-nucleotidase III) (cN-III) (Pyrimidine 5'-nucleotidase 1) (P5'N-1) (P5N-1) (PN-I) (Uridine 5'-monophosphate hydrolase 1) (p36)	1					0.992718	CT249
PTPRF	P10586	P10586	Receptor-type tyrosine-protein phosphatase F (EC 3.1.3.48) (Leukocyte common antigen related) (LAR)	1					0.948056	CT249
SAE1	Q9UBE0	Q9UBE0	SUMO-activating enzyme subunit 1 (Ubiquitin-like 1-activating enzyme E1A)	1					0.860005	CT249
SOAT1	P35610	P35610	Sterol O-acyltransferase 1 (EC 2.3.1.26) (Acyl-coenzyme A:cholesterol acyltransferase 1) (ACAT-1) (Cholesterol acyltransferase 1)	1					0.815449	CT249
MET7A	Q9H8H3	Q9H8H3	Methyltransferase-like protein 7A (EC 2.1.1.-) (Protein AAM-B)	1					0.780028	CT249
ABHD3	Q8WU67	Q8WU67	Abhydrolase domain-containing protein 3 (EC 3.1.1.-) (Lung alpha/beta hydrolase 3)	1					0.740841	CT249
AT1B3	P54709	P54709	Sodium/potassium-transporting ATPase subunit beta-3 (Sodium/potassium-dependent ATPase subunit beta-3) (ATPB-3) (CD antigen CD298)	1					0.72028	CT249
GBB4	Q9HAV0	Q9HAV0	Guanine nucleotide-binding protein subunit beta-4 (Transducin beta chain 4)	1					0.716177	CT249
T161A	Q9NX61	Q9NX61	Transmembrane protein 161A	1					0.712382	CT249
PTH2	Q9Y3E5	Q9Y3E5	Peptidyl-tRNA hydrolase 2, mitochondrial (PTH 2) (EC 3.1.1.29) (Bcl-2 inhibitor of transcription 1)	1					0.70793	CT249
CSN2	P61201	P61201	COP9 signalosome complex subunit 2 (SGN2) (Signalosome subunit 2) (Alien homolog) (JAB1-containing signalosome subunit 2) (Thyroid receptor-interacting protein 15) (TR-interacting protein 15) (TRIP-15)	1					0.979005	CT324
CSN1	Q13098	Q13098	COP9 signalosome complex subunit 1 (SGN1) (Signalosome subunit 1) (G protein pathway suppressor 1) (GPS-1) (JAB1-containing signalosome subunit 1) (Protein MFH)	1					0.928904	CT324
CSN3	Q9UNS2	Q9UNS2	COP9 signalosome complex subunit 3 (SGN3) (Signalosome subunit 3) (JAB1-containing signalosome subunit 3)	1					0.908295	CT324
NDUS1	P28331	P28331	NADH-ubiquinone oxidoreductase 75 kDa subunit, mitochondrial (EC 1.6.5.3) (EC 1.6.99.3) (Complex I-75kD) (CI-75kD)	1					0.885989	CT324
CSN7A	Q9UBW8	Q9UBW8	COP9 signalosome complex subunit 7a (SGN7a) (Signalosome subunit 7a) (Dermal papilla-derived protein 10) (JAB1-containing signalosome subunit 7a)	1					0.79873	CT324
GCP60	Q9H3P7	Q9H3P7	Golgi resident protein GCP60 (Acyl-CoA-binding domain-containing protein 3) (Golgi complex-associated protein 1) (GOCAP1) (Golgi phosphoprotein 1) (GOLPH1) (PBR- and PKA-associated protein 7) (Peripheral benzodiazepine receptor-associated protein PAP7)	1					0.740995	CT324
HTSF1	O43719	O43719	HIV Tat-specific factor 1 (Tat-SF1)	1					0.732779	CT324
ARI1	Q9Y4X5	Q9Y4X5	E3 ubiquitin-protein ligase ARIH1 (EC 6.3.2.-) (H7-AP2) (HHARI) (Monocyte protein 6) (MOP-6) (Protein ariadne-1 homolog) (ARI-1) (UbcH7-binding protein) (UbcM4-interacting protein) (Ubiquitin-conjugating enzyme E2-binding protein 1)	1					0.726996	CT324
TYW1B	Q6NUM6	Q6NUM6	tRNA wybutosine-synthesizing protein 1 homolog B (Radical S-adenosyl methionine and flavodoxin domain-containing protein 2)	1					0.723534	CT324
CSN5	Q92905	Q92905	COP9 signalosome complex subunit 5 (SGN5) (Signalosome subunit 5) (EC 3.4.-.-) (Jun activation domain-binding protein 1)	1					0.706011	CT324
TRI23	P36406	P36406	E3 ubiquitin-protein ligase TRIM23 (EC 6.3.2.-) (ADP-ribosylation factor domain-containing protein 1) (GTP-binding protein ARD-1) (RING finger protein 46) (Tripartite motif-containing protein 23)	1					0.814692	CT324_184-303
CSN4	Q9BT78	Q9BT78	COP9 signalosome complex subunit 4 (SGN4) (Signalosome subunit 4) (JAB1-containing signalosome subunit 4)	1					0.850694	CT324, CT383b_156-243
RINI	P13489	P13489	Ribonuclease inhibitor (Placental ribonuclease inhibitor) (Placental RNase inhibitor) (Ribonuclease/angiogenin inhibitor 1) (RAI)	1					0.737055	CT324, CT383b_156-243
VPP2	Q9Y487	Q9Y487	V-type proton ATPase 116 kDa subunit a isoform 2 (V-ATPase 116 kDa isoform a2) (Lysosomal H(+)-transporting ATPase V0 subunit a2) (TJ6) (Vacuolar proton translocating ATPase 116 kDa subunit a isoform 2)	1					0.981656	CT357
ATPD	P30049	P30049	ATP synthase subunit delta, mitochondrial (F-ATPase delta subunit)	1					0.798973	CT357
CC115	Q96NT0	Q96NT0	Coiled-coil domain-containing protein 115	1					0.792215	CT357
CERS2	Q96G23	Q96G23	Ceramide synthase 2 (CerS2) (LAG1 longevity assurance homolog 2) (SP260) (Tumor metastasis-suppressor gene 1 protein)	1					0.75551	CT357
ATP8	P03928	P03928	ATP synthase protein 8 (A6L) (F-ATPase subunit 8)	1					0.721554	CT357
ATP5H	O75947	O75947	ATP synthase subunit d, mitochondrial (ATPase subunit d)	1					0.716153	CT357
AT5F1	P24539	P24539	ATP synthase subunit b, mitochondrial (ATPase subunit b)	1					0.715241	CT357
ATP5I	P56385	P56385	ATP synthase subunit e, mitochondrial (ATPase subunit e)	1					0.71285	CT357
ATPK	P56134	P56134	ATP synthase subunit f, mitochondrial	1					0.700775	CT357
ZZEF1	O43149	O43149	Zinc finger ZZ-type and EF-hand domain-containing protein 1	1					0.998316	CT383b_156-243
HECD3	Q5T447	Q5T447	E3 ubiquitin-protein ligase HECTD3 (EC 6.3.2.-) (HECT domain-containing protein 3)	1					0.945794	CT383b_156-243
UBE2O	Q9C0C9	Q9C0C9	Ubiquitin-conjugating enzyme E2 O (EC 6.3.2.19) (Ubiquitin carrier protein O) (Ubiquitin-conjugating enzyme E2 of 230 kDa) (Ubiquitin-conjugating enzyme E2-230K) (Ubiquitin-protein ligase O)	1					0.931366	CT383b_156-243
2ABD	Q66LE6	Q66LE6	Serine/threonine-protein phosphatase 2A 55 kDa regulatory subunit B delta isoform (PP2A subunit B isoform B55-delta) (PP2A subunit B isoform PR55-delta) (PP2A subunit B isoform R2-delta) (PP2A subunit B isoform delta)	1					0.925353	CT383b_156-243
DOCK9	Q9BZ29	Q9BZ29	Dedicator of cytokinesis protein 9 (Cdc42 guanine nucleotide exchange factor zizimin-1)	1					0.924544	CT383b_156-243
MIA40	Q8N4Q1	Q8N4Q1	Mitochondrial intermembrane space import and assembly protein 40 (Coiled-coil-helix-coiled-coil-helix domain-containing protein 4)	1					0.88965	CT383b_156-243
LSM5	Q9Y4Y9	Q9Y4Y9	U6 snRNA-associated Sm-like protein LSm5	1					0.838078	CT383b_156-243
IDE	P14735	P14735	Insulin-degrading enzyme (EC 3.4.24.56) (Abeta-degrading protease) (Insulin protease) (Insulinase) (Insulysin)	1					0.830567	CT383b_156-243
RT22	P82650	P82650	28S ribosomal protein S22, mitochondrial (MRP-S22) (S22mt)	1					0.758406	CT383b_156-243
RFOX2	O43251	O43251	RNA binding protein fox-1 homolog 2 (Fox-1 homolog B) (Hexaribonucleotide-binding protein 2) (RNA-binding motif protein 9) (RNA-binding protein 9) (Repressor of tamoxifen transcriptional activity)	1					0.714767	CT383b_156-243
OBSL1	O75147	O75147	Obscurin-like protein 1	1					0.713434	CT383b_156-243
ELP2	Q6IA86	Q6IA86	Elongator complex protein 2 (ELP2) (SHINC-2) (STAT3-interacting protein 1) (StIP1)	1					0.710823	CT383b_156-243
RT29	P51398	P51398	28S ribosomal protein S29, mitochondrial (MRP-S29) (S29mt) (Death-associated protein 3) (DAP-3) (Ionizing radiation resistance conferring protein)	1					0.709719	CT383b_156-243
FNTA	P49354	P49354	Protein farnesyltransferase/geranylgeranyltransferase type-1 subunit alpha (EC 2.5.1.58) (EC 2.5.1.59) (CAAX farnesyltransferase subunit alpha) (FTase-alpha) (Ras proteins prenyltransferase subunit alpha) (Type I protein geranyl-geranyltransferase subunit alpha) (GGTase-I-alpha)	1					0.705374	CT383b_156-243
SIR1	Q96EB6	Q96EB6	NAD-dependent protein deacetylase sirtuin-1 (hSIRT1) (EC 3.5.1.-) (Regulatory protein SIR2 homolog 1) (SIR2-like protein 1) (hSIR2) [Cleaved into: SirtT1 75 kDa fragment (75SirT1)]	1					0.703145	CT383b_156-243
PTCD3	Q96EY7	Q96EY7	Pentatricopeptide repeat domain-containing protein 3, mitochondrial (Transformation-related gene 15 protein) (TRG-15)	1					0.689344	CT383b_156-243
LTV1	Q96GA3	Q96GA3	Protein LTV1 homolog	1					0.680265	CT383b_156-243
ZN622	Q969S3	Q969S3	Zinc finger protein 622 (Zinc finger-like protein 9)	1					0.676337	CT383b_156-243
2ABA	P63151	P63151	Serine/threonine-protein phosphatase 2A 55 kDa regulatory subunit B alpha isoform (PP2A subunit B isoform B55-alpha) (PP2A subunit B isoform PR55-alpha) (PP2A subunit B isoform R2-alpha) (PP2A subunit B isoform alpha)	1					0.674622	CT383b_156-243
RT18B	Q9Y676	Q9Y676	28S ribosomal protein S18b, mitochondrial (MRP-S18-b) (Mrps18-b) (S18mt-b) (28S ribosomal protein S18-2, mitochondrial) (MRP-S18-2)	1					0.64399	CT383b_156-243
PP6R3	Q5H9R7	Q5H9R7	Serine/threonine-protein phosphatase 6 regulatory subunit 3 (SAPS domain family member 3) (Sporulation-induced transcript 4-associated protein SAPL)	1					0.568862	CT383b_156-243
RT34	P82930	P82930	28S ribosomal protein S34, mitochondrial (MRP-S34) (S34mt)	1					0.549235	CT383b_156-243
RT05	P82675	P82675	28S ribosomal protein S5, mitochondrial (MRP-S5) (S5mt)	1					0.549086	CT383b_156-243
OLA1	Q9NTK5	Q9NTK5	Obg-like ATPase 1 (EC 3.6.3.-) (DNA damage-regulated overexpressed in cancer 45) (DOC45) (GTP-binding protein 9)	1					0.543299	CT383b_156-243
MEP50	Q9BQA1	Q9BQA1	Methylosome protein 50 (MEP-50) (Androgen receptor cofactor p44) (WD repeat-containing protein 77) (p44/Mep50)	1					0.543087	CT383b_156-243
IPO4	Q8TEX9	Q8TEX9	Importin-4 (Imp4) (Importin-4b) (Imp4b) (Ran-binding protein 4) (RanBP4)	1					0.538734	CT383b_156-243
RT17	Q9Y2R5	Q9Y2R5	28S ribosomal protein S17, mitochondrial (MRP-S17) (S17mt)	1					0.521189	CT383b_156-243
TF3C5	Q9Y5Q8	Q9Y5Q8	General transcription factor 3C polypeptide 5 (TF3C-epsilon) (Transcription factor IIIC 63 kDa subunit) (TFIIIC 63 kDa subunit) (TFIIIC63) (Transcription factor IIIC subunit epsilon)	1					0.520359	CT383b_156-243
MCM6	Q14566	Q14566	DNA replication licensing factor MCM6 (EC 3.6.4.12) (p105MCM)	1					0.510368	CT383b_156-243
GOT1B	Q9Y3E0	Q9Y3E0	Vesicle transport protein GOT1B (Golgi transport 1 homolog B) (Putative NF-kappa-B-activating protein 470) (hGOT1a)	1					0.854961	CT440
BIRC6	Q9NR09	Q9NR09	Baculoviral IAP repeat-containing protein 6 (EC 6.3.2.-) (BIR repeat-containing ubiquitin-conjugating enzyme) (BRUCE) (Ubiquitin-conjugating BIR domain enzyme apollon) (APOLLON)	1					0.85254	CT442_71-150
CLCC1	Q96S66	Q96S66	Chloride channel CLIC-like protein 1 (Mid-1-related chloride channel protein 1)	1					0.94343	CT449_17-110
MTCH1	Q9NZJ7	Q9NZJ7	Mitochondrial carrier homolog 1 (Presenilin-associated protein)	1					0.815309	CT449_17-110
TMM68	Q96MH6	Q96MH6	Transmembrane protein 68	1					0.815309	CT449_17-110
DDHD2	O94830	O94830	Phospholipase DDHD2 (EC 3.1.1.-) (DDHD domain-containing protein 2) (SAM, WWE and DDHD domain-containing protein 1)	1					0.803833	CT449_17-110
SGMR1	Q99720	Q99720	Sigma non-opioid intracellular receptor 1 (Aging-associated gene 8 protein) (SR31747-binding protein) (SR-BP) (Sigma 1-type opioid receptor) (SIG-1R) (Sigma1-receptor) (Sigma1R) (hSigmaR1)	1					0.800992	CT449_17-110
MARH5	Q9NX47	Q9NX47	E3 ubiquitin-protein ligase MARCH5 (EC 6.3.2.-) (Membrane-associated RING finger protein 5) (Membrane-associated RING-CH protein V) (MARCH-V) (Mitochondrial ubiquitin ligase) (MITOL) (RING finger protein 153)	1					0.754005	CT449_17-110
SEC62	Q99442	Q99442	Translocation protein SEC62 (Translocation protein 1) (TP-1) (hTP-1)	1					0.748855	CT449_17-110
VMP1	Q96GC9	Q96GC9	Vacuole membrane protein 1 (Transmembrane protein 49)	1					0.72641	CT449_17-110
GPDM	P43304	P43304	Glycerol-3-phosphate dehydrogenase, mitochondrial (GPD-M) (GPDH-M) (EC 1.1.5.3) (mtGPD)	1					0.69001	CT449_17-110
TOM70	O94826	O94826	Mitochondrial import receptor subunit TOM70 (Mitochondrial precursor proteins import receptor) (Translocase of outer membrane 70 kDa subunit)	1					0.989941	CT556
HMCS1	Q01581	Q01581	Hydroxymethylglutaryl-CoA synthase, cytoplasmic (HMG-CoA synthase) (EC 2.3.3.10) (3-hydroxy-3-methylglutaryl coenzyme A synthase)	1					0.977423	CT556
APC7	Q9UJX3	Q9UJX3	Anaphase-promoting complex subunit 7 (APC7) (Cyclosome subunit 7)	1					0.874798	CT556
SNG1	O43759	O43759	Synaptogyrin-1	1					0.81706	CT556
VKGC	P38435	P38435	Vitamin K-dependent gamma-carboxylase (EC 4.1.1.90) (Gamma-glutamyl carboxylase) (Peptidyl-glutamate 4-carboxylase) (Vitamin K gamma glutamyl carboxylase)	1					0.814823	CT556
FND3A	Q9Y2H6	Q9Y2H6	Fibronectin type-III domain-containing protein 3A (Human gene expressed in odontoblasts)	1					0.810027	CT556
LST8	Q9BVC4	Q9BVC4	Target of rapamycin complex subunit LST8 (TORC subunit LST8) (G protein beta subunit-like) (Gable) (Protein GbetaL) (Mammalian lethal with SEC13 protein 8) (mLST8)	1					0.810027	CT556
RDH13	Q8NBN7	Q8NBN7	Retinol dehydrogenase 13 (EC 1.1.1.-)	1					0.782735	CT556
DCAF6	Q58WW2	Q58WW2	DDB1- and CUL4-associated factor 6 (Androgen receptor complex-associated protein) (ARCAP) (IQ motif and WD repeat-containing protein 1) (Nuclear receptor interaction protein) (NRIP)	1					0.781819	CT556
MTX2	O75431	O75431	Metaxin-2 (Mitochondrial outer membrane import complex protein 2)	1					0.751181	CT556
GUAA	P49915	P49915	GMP synthase [glutamine-hydrolyzing] (EC 6.3.5.2) (GMP synthetase) (Glutamine amidotransferase)	1					0.720707	CT556
DJC11	Q9NVH1	Q9NVH1	DnaJ homolog subfamily C member 11	1					0.66774	CT556
RASN	P01111	P01111	GTPase NRas (Transforming protein N-Ras)	1					0.967922	CT565b_1-144
LTOR5	O43504	O43504	Ragulator complex protein LAMTOR5 (Hepatitis B virus X-interacting protein) (HBV X-interacting protein) (HBX-interacting protein) (Late endosomal/lysosomal adaptor and MAPK and MTOR activator 5)	1					0.851202	CT565b_1-144
KI2L4	Q99706	Q99706	Killer cell immunoglobulin-like receptor 2DL4 (CD158 antigen-like family member D) (G9P) (Killer cell inhibitory receptor 103AS) (KIR-103AS) (MHC class I NK cell receptor KIR103AS) (CD antigen CD158d)	1					0.812662	CT565b_1-144
REEP6	Q96HR9	Q96HR9	Receptor expression-enhancing protein 6 (Polyposis locus protein 1-like 1)	1					0.812662	CT565b_1-144
ALG13	Q9NP73	Q9NP73	UDP-N-acetylglucosamine transferase subunit ALG13 homolog (EC 2.4.1.141) (Asparagine-linked glycosylation 13 homolog) (Glycosyltransferase 28 domain-containing protein 1)	1					0.810954	CT565b_1-144
PLS1	O15162	O15162	Phospholipid scramblase 1 (PL scramblase 1) (Ca(2+)-dependent phospholipid scramblase 1) (Erythrocyte phospholipid scramblase) (MmTRA1b)	1					0.805159	CT565b_1-144
PRAF2	O60831	O60831	PRA1 family protein 2	1					0.788357	CT565b_1-144
VATA	P38606	P38606	V-type proton ATPase catalytic subunit A (V-ATPase subunit A) (EC 3.6.3.14) (V-ATPase 69 kDa subunit) (Vacuolar ATPase isoform VA68) (Vacuolar proton pump subunit alpha)	1					0.708797	CT565b_1-144
SIAS	Q9NR45	Q9NR45	Sialic acid synthase (N-acetylneuraminate synthase) (EC 2.5.1.56) (N-acetylneuraminate-9-phosphate synthase) (EC 2.5.1.57) (N-acetylneuraminic acid phosphate synthase) (N-acetylneuraminic acid synthase)	1					0.742838	CT618
DCAF7	P61962	P61962	DDB1- and CUL4-associated factor 7 (WD repeat-containing protein 68) (WD repeat-containing protein An11 homolog)	1					0.724771	CT618_1-214
ERG1	Q14534	Q14534	Squalene monooxygenase (EC 1.14.13.132) (Squalene epoxidase) (SE)	1					0.982504	CT642
RAB8B	Q92930	Q92930	Ras-related protein Rab-8B	1					0.81439	CT642
SLIRP	Q9GZT3	Q9GZT3	SRA stem-loop-interacting RNA-binding protein, mitochondrial	1					0.706467	CT642
LPPRC	P42704	P42704	Leucine-rich PPR motif-containing protein, mitochondrial (130 kDa leucine-rich protein) (LRP 130) (GP130)	1					0.703389	CT642
KDIS	Q9ULH0	Q9ULH0	Kinase D-interacting substrate of 220 kDa (Ankyrin repeat-rich membrane-spanning protein)	1					0.627825	CT642
RFT1	Q96AA3	Q96AA3	Protein RFT1 homolog	1					0.998058	CT728
S19A2	O60779	O60779	Thiamine transporter 1 (ThTr-1) (ThTr1) (Solute carrier family 19 member 2) (Thiamine carrier 1) (TC1)	1					0.969174	CT728
GPHRC	A6NKF9	A6NKF9	Putative Golgi pH regulator C (Protein GPR89C)	1					0.716016	CT728
DIAP1	O60610	O60610	Protein diaphanous homolog 1 (Diaphanous-related formin-1) (DRF1)	1					0.962343	CT788_26-166
DIAP3	Q9NSV4	Q9NSV4	Protein diaphanous homolog 3 (Diaphanous-related formin-3) (DRF3) (MDia2)	1					0.923953	CT788_26-166
CNDH2	Q6IBW4	Q6IBW4	Condensin-2 complex subunit H2 (Chromosome-associated protein H2) (hCAP-H2) (Kleisin-beta) (Non-SMC condensin II complex subunit H2)	1					0.897217	CT788_26-166
CAND2	O75155	O75155	Cullin-associated NEDD8-dissociated protein 2 (Cullin-associated and neddylation-dissociated protein 2) (Epididymis tissue protein Li 169) (TBP-interacting protein of 120 kDa B) (TBP-interacting protein 120B) (p120 CAND2)	1					0.894046	CT788_26-166
NOP9	Q86U38	Q86U38	Nucleolar protein 9	1					0.856563	CT788_26-166
CNDG2	Q86XI2	Q86XI2	Condensin-2 complex subunit G2 (Chromosome-associated protein G2) (CAP-G2) (hCAP-G2) (Leucine zipper protein 5) (Non-SMC condensin II complex subunit G2)	1					0.844226	CT788_26-166
HEAT3	Q7Z4Q2	Q7Z4Q2	HEAT repeat-containing protein 3	1					0.837695	CT788_26-166
RRP1	P56182	P56182	Ribosomal RNA processing protein 1 homolog A (Novel nuclear protein 1) (NNP-1) (Nucleolar protein Nop52) (RRP1-like protein)	1					0.82373	CT788_26-166
ZC3H1	O60293	O60293	Zinc finger C3H1 domain-containing protein (Coiled-coil domain-containing protein 131) (Proline/serine-rich coiled-coil protein 2)	1					0.815289	CT788_26-166
SCAP	Q12770	Q12770	Sterol regulatory element-binding protein cleavage-activating protein (SCAP) (SREBP cleavage-activating protein)	1					0.812266	CT788_26-166
CAND1	Q86VP6	Q86VP6	Cullin-associated NEDD8-dissociated protein 1 (Cullin-associated and neddylation-dissociated protein 1) (TBP-interacting protein of 120 kDa A) (TBP-interacting protein 120A) (p120 CAND1)	1					0.803381	CT788_26-166
GOLP3	Q9H4A6	Q9H4A6	Golgi phosphoprotein 3 (Coat protein GPP34) (Mitochondrial DNA absence factor) (MIDAS)	1					0.793467	CT788_26-166
NAF1	Q96HR8	Q96HR8	H/ACA ribonucleoprotein complex non-core subunit NAF1 (hNAF1)	1					0.785672	CT788_26-166
GTF2I	P78347	P78347	General transcription factor II-I (GTFII-I) (TFII-I) (Bruton tyrosine kinase-associated protein 135) (BAP-135) (BTK-associated protein 135) (SRF-Phox1-interacting protein) (SPIN) (Williams-Beuren syndrome chromosomal region 6 protein)	1					0.758017	CT788_26-166
SMC2	O95347	O95347	Structural maintenance of chromosomes protein 2 (SMC protein 2) (SMC-2) (Chromosome-associated protein E) (hCAP-E) (XCAP-E homolog)	1					0.749488	CT788_26-166
GEMI6	Q8WXD5	Q8WXD5	Gem-associated protein 6 (Gemin-6) (SIP2)	1					0.747577	CT788_26-166
CNDD3	P42695	P42695	Condensin-2 complex subunit D3 (Non-SMC condensin II complex subunit D3) (hCAP-D3)	1					0.734399	CT788_26-166
SAPC2	Q86UD0	Q86UD0	Suppressor APC domain-containing protein 2 (Tumor specificity and mitosis phase-dependent expression protein) (TS/MDEP) (p42.3)	1					0.733337	CT788_26-166
P53	P04637	P04637	Cellular tumor antigen p53 (Antigen NY-CO-13) (Phosphoprotein p53) (Tumor suppressor p53)	1					0.7165	CT788_26-166
DDX20	Q9UHI6	Q9UHI6	Probable ATP-dependent RNA helicase DDX20 (EC 3.6.4.13) (Component of gems 3) (DEAD box protein 20) (DEAD box protein DP 103) (Gemin-3)	1					0.700765	CT788_26-166
ITCH	Q96J02	Q96J02	E3 ubiquitin-protein ligase Itchy homolog (Itch) (EC 6.3.2.-) (Atrophin-1-interacting protein 4) (AIP4) (NFE2-associated polypeptide 1) (NAPP1)	1					0.962826	CT813
MSH6	P52701	P52701	DNA mismatch repair protein Msh6 (hMSH6) (G/T mismatch-binding protein) (GTBP) (GTMBP) (MutS-alpha 160 kDa subunit) (p160)	1					0.947321	CT813
PDE12	Q6L8Q7	Q6L8Q7	2',5'-phosphodiesterase 12 (2'-PDE) (2-PDE) (EC 3.1.4.-)	1					0.906607	CT813
MSH2	P43246	P43246	DNA mismatch repair protein Msh2 (hMSH2) (MutS protein homolog 2)	1					0.872165	CT813
DDX49	Q9Y6V7	Q9Y6V7	Probable ATP-dependent RNA helicase DDX49 (EC 3.6.4.13) (DEAD box protein 49)	1					0.813966	CT813
COA4	Q9NYJ1	Q9NYJ1	Cytochrome c oxidase assembly factor 4 homolog, mitochondrial (Coiled-coil-helix-coiled-coil-helix domain-containing protein 8) (E2-induced gene 2 protein)	1					0.792401	CT813
MILK1	Q8N3F8	Q8N3F8	MICAL-like protein 1 (Molecule interacting with Rab13) (MIRab13)	1					0.715254	CT813
SPT5H	O00267	O00267	Transcription elongation factor SPT5 (hSPT5) (DRB sensitivity-inducing factor 160 kDa subunit) (DSIF p160) (DRB sensitivity-inducing factor large subunit) (DSIF large subunit) (Tat-cotransactivator 1 protein) (Tat-CT1 protein)	1					0.715254	CT813
DDA1	Q9BW61	Q9BW61	DET1- and DDB1-associated protein 1 (Placenta cross-immune reaction antigen 1) (PCIA-1)	1					0.81369	CT814
PJA2	O43164	O43164	E3 ubiquitin-protein ligase Praja-2 (Praja2) (EC 6.3.2.-) (RING finger protein 131)	1					0.701552	CT814
VPRBP	Q9Y4B6	Q9Y4B6	Protein VPRBP (DDB1- and CUL4-associated factor 1) (HIV-1 Vpr-binding protein) (VprBP) (Vpr-interacting protein)	1					0.876426	CT814, CT383b_156-243
CD052	Q8N5G0	Q8N5G0	Uncharacterized protein C4orf52	1					0.998499	CT819
CQ089	A1L188	A1L188	Uncharacterized protein C17orf89	1					0.980477	CT819
NDUF5	Q5TEU4	Q5TEU4	NADH dehydrogenase [ubiquinone] 1 alpha subcomplex assembly factor 5 (Probable methyltransferase C20orf7, mitochondrial) (EC 2.1.1.-)	1					0.944817	CT819
PUR4	O15067	O15067	Phosphoribosylformylglycinamidine synthase (FGAM synthase) (FGAMS) (EC 6.3.5.3) (Formylglycinamide ribotide amidotransferase) (FGARAT) (Formylglycinamide ribotide synthetase)	1					0.814554	CT819
MTX1	Q13505	Q13505	Metaxin-1 (Mitochondrial outer membrane import complex protein 1)	1					0.786795	CT819
WFS1	O76024	O76024	Wolframin	1					0.813463	CT846
LMBR1	Q8WVP7	Q8WVP7	Limb region 1 protein homolog (Differentiation-related gene 14 protein)	1					0.796276	CT846
PP2BA	Q08209	Q08209	Serine/threonine-protein phosphatase 2B catalytic subunit alpha isoform (EC 3.1.3.16) (CAM-PRP catalytic subunit) (Calmodulin-dependent calcineurin A subunit alpha isoform)	1					0.874124	IncA
UBP11	P51784	P51784	Ubiquitin carboxyl-terminal hydrolase 11 (EC 3.4.19.12) (Deubiquitinating enzyme 11) (Ubiquitin thioesterase 11) (Ubiquitin-specific-processing protease 11)	1					0.853408	INCD_CHLTR_95-141_D
KINH	P33176	P33176	Kinesin-1 heavy chain (Conventional kinesin heavy chain) (Ubiquitous kinesin heavy chain) (UKHC)	1					0.812497	INCD_CHLTR_95-141_D
FLNC	Q14315	Q14315	Filamin-C (FLN-C) (FLNc) (ABP-280-like protein) (ABP-L) (Actin-binding-like protein) (Filamin-2) (Gamma-filamin)	1					0.712397	INCD_CHLTR_95-141_D
SNX32	Q86XE0	Q86XE0	Sorting nexin-32 (Sorting nexin-6B)	1					0.870363	INCE_CHLTR_101-132
DPP9	Q86TI2	Q86TI2	Dipeptidyl peptidase 9 (DP9) (EC 3.4.14.5) (Dipeptidyl peptidase IV-related protein 2) (DPRP-2) (Dipeptidyl peptidase IX) (DPP IX) (Dipeptidyl peptidase-like protein 9) (DPLP9)	1					0.82551	INCE_CHLTR_101-132
TF2H2	Q13888	Q13888	General transcription factor IIH subunit 2 (Basic transcription factor 2 44 kDa subunit) (BTF2 p44) (General transcription factor IIH polypeptide 2) (TFIIH basal transcription factor complex p44 subunit)	1					0.747572	INCE_CHLTR_101-132
CADM1	Q9BY67	Q9BY67	Cell adhesion molecule 1 (Immunoglobulin superfamily member 4) (IgSF4) (Nectin-like protein 2) (NECL-2) (Spermatogenic immunoglobulin superfamily) (SgIgSF) (Synaptic cell adhesion molecule) (SynCAM) (Tumor suppressor in lung cancer 1) (TSLC-1)	1					0.994633	INCE_CHLTR_MS
PTPRU	Q92729	Q92729	Receptor-type tyrosine-protein phosphatase U (R-PTP-U) (EC 3.1.3.48) (Pancreatic carcinoma phosphatase 2) (PCP-2) (Protein-tyrosine phosphatase J) (PTP-J) (hPTP-J) (Protein-tyrosine phosphatase pi) (PTP pi) (Protein-tyrosine phosphatase receptor omicron) (PTP-RO) (Receptor-type protein-tyrosine phosphatase psi) (R-PTP-psi)	1					0.989492	INCE_CHLTR_MS
NOTC2	Q04721	Q04721	Neurogenic locus notch homolog protein 2 (Notch 2) (hN2) [Cleaved into: Notch 2 extracellular truncation; Notch 2 intracellular domain]	1					0.982152	INCE_CHLTR_MS
E41L3	Q9Y2J2	Q9Y2J2	Band 4.1-like protein 3 (4.1B) (Differentially expressed in adenocarcinoma of the lung protein 1) (DAL-1)	1					0.975285	INCE_CHLTR_MS
STX12	Q86Y82	Q86Y82	Syntaxin-12	1					0.915329	INCE_CHLTR_MS
EFNB1	P98172	P98172	Ephrin-B1 (EFL-3) (ELK ligand) (ELK-L) (EPH-related receptor tyrosine kinase ligand 2) (LERK-2)	1					0.91431	INCE_CHLTR_MS
LMBD2	Q68DH5	Q68DH5	LMBR1 domain-containing protein 2	1					0.903158	INCE_CHLTR_MS
STX18	Q9P2W9	Q9P2W9	Syntaxin-18 (Cell growth-inhibiting gene 9 protein)	1					0.889822	INCE_CHLTR_MS
TF65	Q04206	Q04206	Transcription factor p65 (Nuclear factor NF-kappa-B p65 subunit) (Nuclear factor of kappa light polypeptide gene enhancer in B-cells 3)	1					0.872108	INCE_CHLTR_MS
TRM7	Q9UET6	Q9UET6	Putative tRNA (cytidine(32)/guanosine(34)-2'-O)-methyltransferase (EC 2.1.1.205) (2'-O-ribose RNA methyltransferase TRM7 homolog) (Protein ftsJ homolog 1)	1					0.791211	INCE_CHLTR_MS
1A11	P13746	P13746	HLA class I histocompatibility antigen, A-11 alpha chain (MHC class I antigen A*11)	1					0.768814	INCE_CHLTR_MS
1A23	P30447	P30447	HLA class I histocompatibility antigen, A-23 alpha chain (HLA class I histocompatibility antigen, A-9 alpha chain) (MHC class I antigen A*23)	1					0.768814	INCE_CHLTR_MS
1A24	P05534	P05534	HLA class I histocompatibility antigen, A-24 alpha chain (Aw-24) (HLA class I histocompatibility antigen, A-9 alpha chain) (MHC class I antigen A*24)	1					0.768814	INCE_CHLTR_MS
TM192	Q8IY95	Q8IY95	Transmembrane protein 192	1					0.755081	INCE_CHLTR_MS
CA043	Q9BWL3	Q9BWL3	Uncharacterized protein C1orf43 (Hepatitis C virus NS5A-transactivated protein 4) (HCV NS5A-transactivated protein 4) (Protein NICE-3) (S863-3)	1					0.748931	INCE_CHLTR_MS
PR15B	Q5SWA1	Q5SWA1	Protein phosphatase 1 regulatory subunit 15B	1					0.748931	INCE_CHLTR_MS
T106B	Q9NUM4	Q9NUM4	Transmembrane protein 106B	1					0.747176	INCE_CHLTR_MS
CSTN3	Q9BQT9	Q9BQT9	Calsyntenin-3 (Alcadein-beta) (Alc-beta)	1					0.74615	INCE_CHLTR_MS
DSC3	Q14574	Q14574	Desmocollin-3 (Cadherin family member 3) (Desmocollin-4) (HT-CP)	1					0.741174	INCE_CHLTR_MS
NOTC1	P46531	P46531	Neurogenic locus notch homolog protein 1 (Notch 1) (hN1) (Translocation-associated notch protein TAN-1) [Cleaved into: Notch 1 extracellular truncation; Notch 1 intracellular domain (NICD)]	1					0.741174	INCE_CHLTR_MS
CDKAL	Q5VV42	Q5VV42	Threonylcarbamoyladenosine tRNA methylthiotransferase (EC 2.-.-.-) (CDK5 regulatory subunit-associated protein 1-like 1) (tRNA-t(6)A37 methylthiotransferase)	1					0.732077	INCE_CHLTR_MS
STX5	Q13190	Q13190	Syntaxin-5	1					0.700241	INCE_CHLTR_MS
MAN1	Q9Y2U8	Q9Y2U8	Inner nuclear membrane protein Man1 (LEM domain-containing protein 3)	1					0.691498	INCE_CHLTR_MS
ADPGK	Q9BRR6	Q9BRR6	ADP-dependent glucokinase (ADP-GK) (ADPGK) (EC 2.7.1.147) (RbBP-35)	1					0.677128	INCE_CHLTR_MS
UFL1	O94874	O94874	E3 UFM1-protein ligase 1 (EC 6.3.2.-) (LZAP-binding protein)	1					0.659785	INCE_CHLTR_MS
CO3A1	P02461	P02461	Collagen alpha-1(III) chain	1					0.800938	INCF_CHLTR_1-26
CAN2	P17655	P17655	Calpain-2 catalytic subunit (EC 3.4.22.53) (Calcium-activated neutral proteinase 2) (CANP 2) (Calpain M-type) (Calpain large polypeptide L2) (Calpain-2 large subunit) (Millimolar-calpain) (M-calpain)	1					0.725782	INCF_CHLTR_1-26
MPPB	O75439	O75439	Mitochondrial-processing peptidase subunit beta (EC 3.4.24.64) (Beta-MPP) (P-52)	1					0.711856	INCF_CHLTR_1-26
PUR1	Q06203	Q06203	Amidophosphoribosyltransferase (ATase) (EC 2.4.2.14) (Glutamine phosphoribosylpyrophosphate amidotransferase) (GPAT)	1					0.711115	INCF_CHLTR_1-26
KAD2	P54819	P54819	Adenylate kinase 2, mitochondrial (AK 2) (EC 2.7.4.3) (ATP-AMP transphosphorylase 2) (ATP:AMP phosphotransferase) (Adenylate monophosphate kinase) [Cleaved into: Adenylate kinase 2, mitochondrial, N-terminally processed]	1					0.710356	INCF_CHLTR_1-26
PDS5A	Q29RF7	Q29RF7	Sister chromatid cohesion protein PDS5 homolog A (Cell proliferation-inducing gene 54 protein) (Sister chromatid cohesion protein 112) (SCC-112)	1					0.954553	INCF_CHLTR_MS
XPO7	Q9UIA9	Q9UIA9	Exportin-7 (Exp7) (Ran-binding protein 16)	1					0.867752	INCF_CHLTR_MS
GCP2	Q9BSJ2	Q9BSJ2	Gamma-tubulin complex component 2 (GCP-2) (hGCP2) (Gamma-ring complex protein 103 kDa) (h103p) (hGrip103) (Spindle pole body protein Spc97 homolog) (hSpc97)	1					0.841335	INCF_CHLTR_MS
F210B	Q96KR6	Q96KR6	Protein FAM210B	1					0.782054	INCF_CHLTR_MS
KIF14	Q15058	Q15058	Kinesin-like protein KIF14	1					0.723578	INCF_CHLTR_MS
RM16	Q9NX20	Q9NX20	39S ribosomal protein L16, mitochondrial (L16mt) (MRP-L16)	1					0.70855	INCG_CHLTR_MS
TERA	P55072	P55072	Transitional endoplasmic reticulum ATPase (TER ATPase) (EC 3.6.4.6) (15S Mg(2+)-ATPase p97 subunit) (Valosin-containing protein) (VCP)	1				0			26042774
AARS	P49588	P49588	Alanine--tRNA ligase, cytoplasmic (EC 6.1.1.7) (Alanyl-tRNA synthetase) (AlaRS) (Renal carcinoma antigen NY-REN-42)	1				0
ALG5	Q9Y673	Q9Y673	Dolichyl-phosphate beta-glucosyltransferase (DolP-glucosyltransferase) (EC 2.4.1.117) (Asparagine-linked glycosylation protein 5 homolog)	1				0
ANXA1	P04083	P04083	Annexin A1 (Annexin I) (Annexin-1) (Calpactin II) (Calpactin-2) (Chromobindin-9) (Lipocortin I) (Phospholipase A2 inhibitory protein) (p35)	1				0
ANXA2	P07355	P07355	Annexin A2 (Annexin II) (Annexin-2) (Calpactin I heavy chain) (Calpactin-1 heavy chain) (Chromobindin-8) (Lipocortin II) (Placental anticoagulant protein IV) (PAP-IV) (Protein I) (p36)	1				0
APMAP	Q9HDC9	Q9HDC9	Adipocyte plasma membrane-associated protein (Protein BSCv)	1				0
ARFGAP1	Q8N6T3	Q8N6T3	ADP-ribosylation factor GTPase-activating protein 1 (ARF GAP 1) (ADP-ribosylation factor 1 GTPase-activating protein) (ARF1 GAP) (ARF1-directed GTPase-activating protein)	1				0
ARL6IP5	O75915	O75915	PRA1 family protein 3 (ADP-ribosylation factor-like protein 6-interacting protein 5) (ARL-6-interacting protein 5) (Aip-5) (Cytoskeleton-related vitamin A-responsive protein) (Dermal papilla-derived protein 11) (GTRAP3-18) (Glutamate transporter EAAC1-interacting protein) (JM5) (Prenylated Rab acceptor protein 2) (Protein JWa) (Putative MAPK-activating protein PM27)	1				0
ARPC4	P59998	P59998	Actin-related protein 2/3 complex subunit 4 (Arp2/3 complex 20 kDa subunit) (p20-ARC)	1				0
ATP13A1	Q9HD20	Q9HD20	Manganese-transporting ATPase 13A1 (EC 3.6.3.-)	1				0
ATXN10	Q9UBB4	Q9UBB4	Ataxin-10 (Brain protein E46 homolog) (Spinocerebellar ataxia type 10 protein)	1				0
AUP1	Q9Y679	Q9Y679	Ancient ubiquitous protein 1	1				0
AZI1	Q9UPN4	Q9UPN4	Centrosomal protein of 131 kDa (5-azacytidine-induced protein 1) (Pre-acrosome localization protein 1)	1				0
C14orf1	Q9UKR5	Q9UKR5	Probable ergosterol biosynthetic protein 28	1				0
C19orf10	Q969H8	Q969H8	Myeloid-derived growth factor (MYDGF) (Interleukin-25) (IL-25) (Stromal cell-derived growth factor SF20)	1				0
CAPZA1	P52907	P52907	F-actin-capping protein subunit alpha-1 (CapZ alpha-1)	1				0
CAPZB	P47756	P47756	F-actin-capping protein subunit beta (CapZ beta)	1				0
CCT2	P78371	P78371	T-complex protein 1 subunit beta (TCP-1-beta) (CCT-beta)	1				0
CCT3	P49368	P49368	T-complex protein 1 subunit gamma (TCP-1-gamma) (CCT-gamma) (hTRiC5)	1				0
CCT4	P50991	P50991	T-complex protein 1 subunit delta (TCP-1-delta) (CCT-delta) (Stimulator of TAR RNA-binding)	1				0
CCT5	P48643	P48643	T-complex protein 1 subunit epsilon (TCP-1-epsilon) (CCT-epsilon)	1				0
CCT6A	P40227	P40227	T-complex protein 1 subunit zeta (TCP-1-zeta) (Acute morphine dependence-related protein 2) (CCT-zeta-1) (HTR3) (Tcp20)	1				0
CCT7	Q99832	Q99832	T-complex protein 1 subunit eta (TCP-1-eta) (CCT-eta) (HIV-1 Nef-interacting protein) [Cleaved into: T-complex protein 1 subunit eta, N-terminally processed]	1				0
CDC42	P60953	P60953	Cell division control protein 42 homolog (G25K GTP-binding protein)	1				0
CEP85	Q6P2H3	Q6P2H3	Centrosomal protein of 85 kDa (Cep85) (Coiled-coil domain-containing protein 21)	1				0
CHP	Q99653	Q99653	Calcineurin B homologous protein 1 (Calcineurin B-like protein) (Calcium-binding protein CHP) (Calcium-binding protein p22) (EF-hand calcium-binding domain-containing protein p22)	1				0
CISD2	Q8N5K1	Q8N5K1	CDGSH iron-sulfur domain-containing protein 2 (Endoplasmic reticulum intermembrane small protein) (MitoNEET-related 1 protein) (Miner1) (Nutrient-deprivation autophagy factor-1) (NAF-1)	1				0
CNPY2	Q9Y2B0	Q9Y2B0	Protein canopy homolog 2 (MIR-interacting saposin-like protein) (Putative secreted protein Zsig9) (Transmembrane protein 4)	1				0
COPA	P53621	P53621	Coatomer subunit alpha (Alpha-coat protein) (Alpha-COP) (HEP-COP) (HEPCOP) [Cleaved into: Xenin (Xenopsin-related peptide); Proxenin]	1				0
CROCC	Q5TZA2	Q5TZA2	Rootletin (Ciliary rootlet coiled-coil protein)	1				0
CSPP1	Q1MSJ5	Q1MSJ5	Centrosome and spindle pole-associated protein 1	1				0
CYB5A	P00167	P00167	Cytochrome b5 (Microsomal cytochrome b5 type A) (MCB5)	1				0
CYP51A1	Q16850	Q16850	Lanosterol 14-alpha demethylase (LDM) (EC 1.14.13.70) (CYPLI) (Cytochrome P450 51A1) (Cytochrome P450-14DM) (Cytochrome P45014DM) (Cytochrome P450LI) (Sterol 14-alpha demethylase)	1				0
DAD1	P61803	P61803	Dolichyl-diphosphooligosaccharide--protein glycosyltransferase subunit DAD1 (Oligosaccharyl transferase subunit DAD1) (EC 2.4.99.18) (Defender against cell death 1) (DAD-1)	1				0
DCD	P81605	P81605	Dermcidin (EC 3.4.-.-) (Preproteolysin) [Cleaved into: Survival-promoting peptide; DCD-1]	1				0
DDOST	P39656	P39656	Dolichyl-diphosphooligosaccharide--protein glycosyltransferase 48 kDa subunit (DDOST 48 kDa subunit) (Oligosaccharyl transferase 48 kDa subunit) (EC 2.4.99.18)	1				0
DHCR24	Q15392	Q15392	Delta(24)-sterol reductase (EC 1.3.1.72) (24-dehydrocholesterol reductase) (3-beta-hydroxysterol delta-24-reductase) (Diminuto/dwarf1 homolog) (Seladin-1)	1				0
DSG1	Q02413	Q02413	Desmoglein-1 (Cadherin family member 4) (Desmosomal glycoprotein 1) (DG1) (DGI) (Pemphigus foliaceus antigen)	1				0
DSP	P15924	P15924	Desmoplakin (DP) (250/210 kDa paraneoplastic pemphigus antigen)	1				0
DYNC1I2	Q13409	Q13409	Cytoplasmic dynein 1 intermediate chain 2 (Cytoplasmic dynein intermediate chain 2) (Dynein intermediate chain 2, cytosolic) (DH IC-2)	1				0
EBP	Q15125	Q15125	3-beta-hydroxysteroid-Delta(8),Delta(7)-isomerase (EC 5.3.3.5) (Cholestenol Delta-isomerase) (Delta(8)-Delta(7) sterol isomerase) (D8-D7 sterol isomerase) (Emopamil-binding protein)	1				0
EEF1A1	P68104	P68104	Elongation factor 1-alpha 1 (EF-1-alpha-1) (Elongation factor Tu) (EF-Tu) (Eukaryotic elongation factor 1 A-1) (eEF1A-1) (Leukocyte receptor cluster member 7)	1				0
EEF1G	P26641	P26641	Elongation factor 1-gamma (EF-1-gamma) (eEF-1B gamma)	1				0
EEF2	P13639	P13639	Elongation factor 2 (EF-2)	1				0
EIF2S1	P05198	P05198	Eukaryotic translation initiation factor 2 subunit 1 (Eukaryotic translation initiation factor 2 subunit alpha) (eIF-2-alpha) (eIF-2A) (eIF-2alpha)	1				0
EIF2S3	P41091	P41091	Eukaryotic translation initiation factor 2 subunit 3 (Eukaryotic translation initiation factor 2 subunit gamma X) (eIF-2-gamma X) (eIF-2gX)	1				0
ENO1	P06733	P06733	Alpha-enolase (EC 4.2.1.11) (2-phospho-D-glycerate hydro-lyase) (C-myc promoter-binding protein) (Enolase 1) (MBP-1) (MPB-1) (Non-neural enolase) (NNE) (Phosphopyruvate hydratase) (Plasminogen-binding protein)	1				0
EPHX1	P07099	P07099	Epoxide hydrolase 1 (EC 3.3.2.9) (Epoxide hydratase) (Microsomal epoxide hydrolase)	1				0
ERAP1	Q9NZ08	Q9NZ08	Endoplasmic reticulum aminopeptidase 1 (EC 3.4.11.-) (ARTS-1) (Adipocyte-derived leucine aminopeptidase) (A-LAP) (Aminopeptidase PILS) (Puromycin-insensitive leucyl-specific aminopeptidase) (PILS-AP) (Type 1 tumor necrosis factor receptor shedding aminopeptidase regulator)	1				0
ERLIN2	O94905	O94905	Erlin-2 (Endoplasmic reticulum lipid raft-associated protein 2) (Stomatin-prohibitin-flotillin-HflC/K domain-containing protein 2) (SPFH domain-containing protein 2)	1				0
ERO1L	Q96HE7	Q96HE7	ERO1-like protein alpha (ERO1-L) (ERO1-L-alpha) (EC 1.8.4.-) (Endoplasmic oxidoreductin-1-like protein) (Endoplasmic reticulum oxidoreductase alpha) (Oxidoreductin-1-L-alpha)	1				0
ERP44	Q9BS26	Q9BS26	Endoplasmic reticulum resident protein 44 (ER protein 44) (ERp44) (Thioredoxin domain-containing protein 4)	1				0
EZR	P15311	P15311	Ezrin (Cytovillin) (Villin-2) (p81)	1				0
FAM129A	Q9BZQ8	Q9BZQ8	Protein Niban (Cell growth-inhibiting gene 39 protein) (Protein FAM129A)	1				0
FKBP10	Q96AY3	Q96AY3	Peptidyl-prolyl cis-trans isomerase FKBP10 (PPIase FKBP10) (EC 5.2.1.8) (65 kDa FK506-binding protein) (65 kDa FKBP) (FKBP-65) (FK506-binding protein 10) (FKBP-10) (Immunophilin FKBP65) (Rotamase)	1				0
FKBP4	Q02790	Q02790	Peptidyl-prolyl cis-trans isomerase FKBP4 (PPIase FKBP4) (EC 5.2.1.8) (51 kDa FK506-binding protein) (FKBP51) (52 kDa FK506-binding protein) (52 kDa FKBP) (FKBP-52) (59 kDa immunophilin) (p59) (FK506-binding protein 4) (FKBP-4) (FKBP59) (HSP-binding immunophilin) (HBI) (Immunophilin FKBP52) (Rotamase) [Cleaved into: Peptidyl-prolyl cis-trans isomerase FKBP4, N-terminally processed]	1				0
FSCN1	Q16658	Q16658	Fascin (55 kDa actin-bundling protein) (Singed-like protein) (p55)	1				0
GANAB	Q14697	Q14697	Neutral alpha-glucosidase AB (EC 3.2.1.84) (Alpha-glucosidase 2) (Glucosidase II subunit alpha)	1				0
GAPDH	P04406	P04406	Glyceraldehyde-3-phosphate dehydrogenase (GAPDH) (EC 1.2.1.12) (Peptidyl-cysteine S-nitrosylase GAPDH) (EC 2.6.99.-)	1				0
GNAI3	P08754	P08754	Guanine nucleotide-binding protein G(k) subunit alpha (G(i) alpha-3)	1				0
GNB1	P62873	P62873	Guanine nucleotide-binding protein G(I)/G(S)/G(T) subunit beta-1 (Transducin beta chain 1)	1				0
GNB2	P62879	P62879	Guanine nucleotide-binding protein G(I)/G(S)/G(T) subunit beta-2 (G protein subunit beta-2) (Transducin beta chain 2)	1				0
GNG12	Q9UBI6	Q9UBI6	Guanine nucleotide-binding protein G(I)/G(S)/G(O) subunit gamma-12	1				0
HSP90AA1	P07900	P07900	Heat shock protein HSP 90-alpha (Heat shock 86 kDa) (HSP 86) (HSP86) (Lipopolysaccharide-associated protein 2) (LAP-2) (LPS-associated protein 2) (Renal carcinoma antigen NY-REN-38)	1				0
HSP90AB1	P08238	P08238	Heat shock protein HSP 90-beta (HSP 90) (Heat shock 84 kDa) (HSP 84) (HSP84)	1				0
HSPA1A	P08107	P08107	Heat shock 70 kDa protein 1A (Heat shock 70 kDa protein 1) (HSP70-1) (HSP70.1)	1				0
HSPH1	Q92598	Q92598	Heat shock protein 105 kDa (Antigen NY-CO-25) (Heat shock 110 kDa protein)	1				0
ITGA6	P23229	P23229	Integrin alpha-6 (CD49 antigen-like family member F) (VLA-6) (CD antigen CD49f) [Cleaved into: Integrin alpha-6 heavy chain; Integrin alpha-6 light chain; Processed integrin alpha-6 (Alpha6p)]	1				0
ITGB4	P16144	P16144	Integrin beta-4 (GP150) (CD antigen CD104)	1				0
JUP	P14923	P14923	Junction plakoglobin (Catenin gamma) (Desmoplakin III) (Desmoplakin-3)	1				0
KIAA0090	Q8N766	Q8N766	ER membrane protein complex subunit 1	1				0
KIAA0889	O94964	O94964	Protein SOGA1 (SOGA family member 1) (Suppressor of glucose by autophagy) (Suppressor of glucose, autophagy-associated protein 1) [Cleaved into: N-terminal form; C-terminal 80 kDa form (80-kDa SOGA fragment)]	1				0
LAMA3	Q16787	Q16787	Laminin subunit alpha-3 (Epiligrin 170 kDa subunit) (E170) (Epiligrin subunit alpha) (Kalinin subunit alpha) (Laminin-5 subunit alpha) (Laminin-6 subunit alpha) (Laminin-7 subunit alpha) (Nicein subunit alpha)	1				0
LDHA	P00338	P00338	L-lactate dehydrogenase A chain (LDH-A) (EC 1.1.1.27) (Cell proliferation-inducing gene 19 protein) (LDH muscle subunit) (LDH-M) (Renal carcinoma antigen NY-REN-59)	1				0
LDHB	P07195	P07195	L-lactate dehydrogenase B chain (LDH-B) (EC 1.1.1.27) (LDH heart subunit) (LDH-H) (Renal carcinoma antigen NY-REN-46)	1				0
LMAN1	P49257	P49257	Protein ERGIC-53 (ER-Golgi intermediate compartment 53 kDa protein) (Gp58) (Intracellular mannose-specific lectin MR60) (Lectin mannose-binding 1)	1				0
LSG1	Q9H089	Q9H089	Large subunit GTPase 1 homolog (hLsg1) (EC 3.6.1.-)	1				0
LZTS2	Q9BRK4	Q9BRK4	Leucine zipper putative tumor suppressor 2 (hLZTS2) (Protein LAPSER1)	1				0
MANF	P55145	P55145	Mesencephalic astrocyte-derived neurotrophic factor (Arginine-rich protein) (Protein ARMET)	1				0
MAP1S	Q66K74	Q66K74	Microtubule-associated protein 1S (MAP-1S) (BPY2-interacting protein 1) (Microtubule-associated protein 8) (Variable charge Y chromosome 2-interacting protein 1) (VCY2-interacting protein 1) (VCY2IP-1) [Cleaved into: MAP1S heavy chain; MAP1S light chain]	1				0
MBOAT7	Q96N66	Q96N66	Lysophospholipid acyltransferase 7 (LPLAT 7) (EC 2.3.1.-) (1-acylglycerophosphatidylinositol O-acyltransferase) (EC 2.3.1.n4) (Bladder and breast carcinoma-overexpressed gene 1 protein) (Leukocyte receptor cluster member 4) (Lysophosphatidylinositol acyltransferase) (LPIAT) (Lyso-PI acyltransferase) (Membrane-bound O-acyltransferase domain-containing protein 7) (O-acyltransferase domain-containin…	1				0
MLEC	Q14165	Q14165	Malectin	1				0
MYOF	Q9NZM1	Q9NZM1	Myoferlin (Fer-1-like protein 3)	1				0
NSDHL	Q15738	Q15738	Sterol-4-alpha-carboxylate 3-dehydrogenase, decarboxylating (EC 1.1.1.170) (Protein H105e3)	1				0
P4HA1	P13674	P13674	Prolyl 4-hydroxylase subunit alpha-1 (4-PH alpha-1) (EC 1.14.11.2) (Procollagen-proline,2-oxoglutarate-4-dioxygenase subunit alpha-1)	1				0
PAICS	P22234	P22234	Multifunctional protein ADE2 [Includes: Phosphoribosylaminoimidazole-succinocarboxamide synthase (EC 6.3.2.6) (SAICAR synthetase); Phosphoribosylaminoimidazole carboxylase (EC 4.1.1.21) (AIR carboxylase) (AIRC)]	1				0
PDIA4	P13667	P13667	Protein disulfide-isomerase A4 (EC 5.3.4.1) (Endoplasmic reticulum resident protein 70) (ER protein 70) (ERp70) (Endoplasmic reticulum resident protein 72) (ER protein 72) (ERp-72) (ERp72)	1				0
PFN1	P07737	P07737	Profilin-1 (Epididymis tissue protein Li 184a) (Profilin I)	1				0
PIGT	Q969N2	Q969N2	GPI transamidase component PIG-T (Phosphatidylinositol-glycan biosynthesis class T protein)	1				0
PKP3	Q9Y446	Q9Y446	Plakophilin-3	1				0
POR	P16435	P16435	NADPH--cytochrome P450 reductase (CPR) (P450R) (EC 1.6.2.4)	1				0
PPIB	P23284	P23284	Peptidyl-prolyl cis-trans isomerase B (PPIase B) (EC 5.2.1.8) (CYP-S1) (Cyclophilin B) (Rotamase B) (S-cyclophilin) (SCYLP)	1				0
PPP1CB	P62140	P62140	Serine/threonine-protein phosphatase PP1-beta catalytic subunit (PP-1B) (PPP1CD) (EC 3.1.3.16) (EC 3.1.3.53)	1				0
PRDX1	Q06830	Q06830	Peroxiredoxin-1 (EC 1.11.1.15) (Natural killer cell-enhancing factor A) (NKEF-A) (Proliferation-associated gene protein) (PAG) (Thioredoxin peroxidase 2) (Thioredoxin-dependent peroxide reductase 2)	1				0
PRDX6	P30041	P30041	Peroxiredoxin-6 (EC 1.11.1.15) (1-Cys peroxiredoxin) (1-Cys PRX) (24 kDa protein) (Acidic calcium-independent phospholipase A2) (aiPLA2) (EC 3.1.1.-) (Antioxidant protein 2) (Liver 2D page spot 40) (Non-selenium glutathione peroxidase) (NSGPx) (EC 1.11.1.9) (Red blood cells page spot 12)	1				0
PSMA1	P25786	P25786	Proteasome subunit alpha type-1 (EC 3.4.25.1) (30 kDa prosomal protein) (PROS-30) (Macropain subunit C2) (Multicatalytic endopeptidase complex subunit C2) (Proteasome component C2) (Proteasome nu chain)	1				0
PSMA3	P25788	P25788	Proteasome subunit alpha type-3 (EC 3.4.25.1) (Macropain subunit C8) (Multicatalytic endopeptidase complex subunit C8) (Proteasome component C8)	1				0
PSMA7	O14818	O14818	Proteasome subunit alpha type-7 (EC 3.4.25.1) (Proteasome subunit RC6-1) (Proteasome subunit XAPC7)	1				0
RAB10	P61026	P61026	Ras-related protein Rab-10	1				0
RAB12	Q6IQ22	Q6IQ22	Ras-related protein Rab-12	1				0
RAB27B	O00194	O00194	Ras-related protein Rab-27B (C25KG)	1				0
RAB2A	P61019	P61019	Ras-related protein Rab-2A	1				0
RAB8A	P61006	P61006	Ras-related protein Rab-8A (Oncogene c-mel)	1				0
RAN	P62826	P62826	GTP-binding nuclear protein Ran (Androgen receptor-associated protein 24) (GTPase Ran) (Ras-like protein TC4) (Ras-related nuclear protein)	1				0
RAP2B	P61225	P61225	Ras-related protein Rap-2b	1				0
RDH11	Q8TC12	Q8TC12	Retinol dehydrogenase 11 (EC 1.1.1.300) (Androgen-regulated short-chain dehydrogenase/reductase 1) (HCV core-binding protein HCBP12) (Prostate short-chain dehydrogenase/reductase 1) (Retinal reductase 1) (RalR1) (Short chain dehydrogenase/reductase family 7C member 1)	1				0
RHOC	P08134	P08134	Rho-related GTP-binding protein RhoC (Rho cDNA clone 9) (h9)	1				0
RPN1	P04843	P04843	Dolichyl-diphosphooligosaccharide--protein glycosyltransferase subunit 1 (EC 2.4.99.18) (Dolichyl-diphosphooligosaccharide--protein glycosyltransferase 67 kDa subunit) (Ribophorin I) (RPN-I) (Ribophorin-1)	1				0
RPN2	P04844	P04844	Dolichyl-diphosphooligosaccharide--protein glycosyltransferase subunit 2 (EC 2.4.99.18) (Dolichyl-diphosphooligosaccharide--protein glycosyltransferase 63 kDa subunit) (RIBIIR) (Ribophorin II) (RPN-II) (Ribophorin-2)	1				0
S100A6	P06703	P06703	Protein S100-A6 (Calcyclin) (Growth factor-inducible protein 2A9) (MLN 4) (Prolactin receptor-associated protein) (PRA) (S100 calcium-binding protein A6)	1				0
SACM1L	Q9NTJ5	Q9NTJ5	Phosphatidylinositide phosphatase SAC1 (EC 3.1.3.-) (Suppressor of actin mutations 1-like protein)	1				0
SEC11A	P67812	P67812	Signal peptidase complex catalytic subunit SEC11A (EC 3.4.21.89) (Endopeptidase SP18) (Microsomal signal peptidase 18 kDa subunit) (SPase 18 kDa subunit) (SEC11 homolog A) (SEC11-like protein 1) (SPC18)	1				0
SEC61A1	P61619	P61619	Protein transport protein Sec61 subunit alpha isoform 1 (Sec61 alpha-1)	1				0
SEC63	Q9UGP8	Q9UGP8	Translocation protein SEC63 homolog	1				0
SERPINH1	P50454	P50454	Serpin H1 (47 kDa heat shock protein) (Arsenic-transactivated protein 3) (AsTP3) (Cell proliferation-inducing gene 14 protein) (Collagen-binding protein) (Colligin) (Rheumatoid arthritis-related antigen RA-A47)	1				0
SIPA1L3	O60292	O60292	Signal-induced proliferation-associated 1-like protein 3 (SIPA1-like protein 3) (SPA-1-like protein 3)	1				0
SPCS1	Q9Y6A9	Q9Y6A9	Signal peptidase complex subunit 1 (EC 3.4.-.-) (Microsomal signal peptidase 12 kDa subunit) (SPase 12 kDa subunit)	1				0
SPINT2	O43291	O43291	Kunitz-type protease inhibitor 2 (Hepatocyte growth factor activator inhibitor type 2) (HAI-2) (Placental bikunin)	1				0
SRPRB	Q9Y5M8	Q9Y5M8	Signal recognition particle receptor subunit beta (SR-beta) (Protein APMCF1)	1				0
SUMF2	Q8NBJ7	Q8NBJ7	Sulfatase-modifying factor 2 (C-alpha-formylglycine-generating enzyme 2)	1				0
SYNGR2	O43760	O43760	Synaptogyrin-2 (Cellugyrin)	1				0
SYPL1	Q16563	Q16563	Synaptophysin-like protein 1 (Pantophysin)	1				0
TARS	P26639	P26639	Threonine--tRNA ligase, cytoplasmic (EC 6.1.1.3) (Threonyl-tRNA synthetase) (ThrRS)	1				0
TCP1	P17987	P17987	T-complex protein 1 subunit alpha (TCP-1-alpha) (CCT-alpha)	1				0
TECR	Q9NZ01	Q9NZ01	Very-long-chain enoyl-CoA reductase (EC 1.3.1.93) (Synaptic glycoprotein SC2) (Trans-2,3-enoyl-CoA reductase) (TER)	1				0
TMED10	P49755	P49755	Transmembrane emp24 domain-containing protein 10 (21 kDa transmembrane-trafficking protein) (S31III125) (S31I125) (Tmp-21-I) (Transmembrane protein Tmp21) (p23) (p24 family protein delta-1) (p24delta1) (p24delta)	1				0
TMED9	Q9BVK6	Q9BVK6	Transmembrane emp24 domain-containing protein 9 (GMP25) (Glycoprotein 25L2) (p24 family protein alpha-2) (p24alpha2) (p25)	1				0
TMEM43	Q9BTV4	Q9BTV4	Transmembrane protein 43 (Protein LUMA)	1				0
TMX1	Q9H3N1	Q9H3N1	Thioredoxin-related transmembrane protein 1 (Thioredoxin domain-containing protein 1) (Transmembrane Trx-related protein)	1				0
TMX2	Q9Y320	Q9Y320	Thioredoxin-related transmembrane protein 2 (Cell proliferation-inducing gene 26 protein) (Thioredoxin domain-containing protein 14)	1				0
TXNDC12	O95881	O95881	Thioredoxin domain-containing protein 12 (EC 1.8.4.2) (Endoplasmic reticulum resident protein 18) (ER protein 18) (ERp18) (Endoplasmic reticulum resident protein 19) (ER protein 19) (ERp19) (Thioredoxin-like protein p19) (hTLP19)	1				0
VPS29	Q9UBQ0	Q9UBQ0	Vacuolar protein sorting-associated protein 29 (hVPS29) (PEP11 homolog) (Vesicle protein sorting 29)	1				0
VPS35	Q96QK1	Q96QK1	Vacuolar protein sorting-associated protein 35 (hVPS35) (Maternal-embryonic 3) (Vesicle protein sorting 35)	1				0
ZMPSTE24	O75844	O75844	CAAX prenyl protease 1 homolog (EC 3.4.24.84) (Farnesylated proteins-converting enzyme 1) (FACE-1) (Prenyl protein-specific endoprotease 1) (Zinc metalloproteinase Ste24 homolog)	1				0
ACTR3	P61158	P61158	Actin-related protein 3 (Actin-like protein 3)	1				0.01
ADAM9	Q13443	Q13443	Disintegrin and metalloproteinase domain-containing protein 9 (ADAM 9) (EC 3.4.24.-) (Cellular disintegrin-related protein) (Meltrin-gamma) (Metalloprotease/disintegrin/cysteine-rich protein 9) (Myeloma cell metalloproteinase)	1				0.01
ALDH3A2	P51648	P51648	Fatty aldehyde dehydrogenase (EC 1.2.1.3) (Aldehyde dehydrogenase 10) (Aldehyde dehydrogenase family 3 member A2) (Microsomal aldehyde dehydrogenase)	1				0.01
ARF3	P61204	P61204	ADP-ribosylation factor 3	1				0.01
ARPC1B	O15143	O15143	Actin-related protein 2/3 complex subunit 1B (Arp2/3 complex 41 kDa subunit) (p41-ARC)	1				0.01
DNAJA1	P31689	P31689	DnaJ homolog subfamily A member 1 (DnaJ protein homolog 2) (HSDJ) (Heat shock 40 kDa protein 4) (Heat shock protein J2) (HSJ-2) (Human DnaJ protein 2) (hDj-2)	1				0.01
RAP1B	P61224	P61224	Ras-related protein Rap-1b (GTP-binding protein smg p21B)	1				0.01
RHOG	P84095	P84095	Rho-related GTP-binding protein RhoG	1				0.01
RPLP0	P05388	P05388	60S acidic ribosomal protein P0 (60S ribosomal protein L10E)	1				0.01
SPTLC2	O15270	O15270	Serine palmitoyltransferase 2 (EC 2.3.1.50) (Long chain base biosynthesis protein 2) (LCB 2) (Long chain base biosynthesis protein 2a) (LCB2a) (Serine-palmitoyl-CoA transferase 2) (SPT 2)	1				0.01
STT3A	P46977	P46977	Dolichyl-diphosphooligosaccharide--protein glycosyltransferase subunit STT3A (Oligosaccharyl transferase subunit STT3A) (STT3-A) (EC 2.4.99.18) (B5) (Integral membrane protein 1) (Transmembrane protein TMC)	1				0.01
VARS	P26640	P26640	Valine--tRNA ligase (EC 6.1.1.9) (Protein G7a) (Valyl-tRNA synthetase) (ValRS)	1				0.01
6PGD	P52209	P52209	6-phosphogluconate dehydrogenase, decarboxylating (EC 1.1.1.44)	1				0.03
AAAS	Q9NRG9	Q9NRG9	Aladin (Adracalin)	1				0.03
AGPAT9	Q53EU6	Q53EU6	Glycerol-3-phosphate acyltransferase 3 (GPAT-3) (EC 2.3.1.15) (1-acyl-sn-glycerol-3-phosphate O-acyltransferase 10) (AGPAT 10) (1-acyl-sn-glycerol-3-phosphate O-acyltransferase 9) (1-AGP acyltransferase 9) (1-AGPAT 9) (EC 2.3.1.51) (Acyl-CoA:glycerol-3-phosphate acyltransferase 3) (hGPAT3) (Lung cancer metastasis-associated protein 1) (Lysophosphatidic acid acyltransferase theta) (LPAAT-theta) (M…	1				0.03
AGTRAP	Q6RW13	Q6RW13	Type-1 angiotensin II receptor-associated protein (AT1 receptor-associated protein)	1				0.03
ANXA5	P08758	P08758	Annexin A5 (Anchorin CII) (Annexin V) (Annexin-5) (Calphobindin I) (CBP-I) (Endonexin II) (Lipocortin V) (Placental anticoagulant protein 4) (PP4) (Placental anticoagulant protein I) (PAP-I) (Thromboplastin inhibitor) (Vascular anticoagulant-alpha) (VAC-alpha)	1				0.03
AP1G1	O43747	O43747	AP-1 complex subunit gamma-1 (Adaptor protein complex AP-1 subunit gamma-1) (Adaptor-related protein complex 1 subunit gamma-1) (Clathrin assembly protein complex 1 gamma-1 large chain) (Gamma1-adaptin) (Golgi adaptor HA1/AP1 adaptin subunit gamma-1)	1				0.03
ARG1	P05089	P05089	Arginase-1 (EC 3.5.3.1) (Liver-type arginase) (Type I arginase)	1				0.03
ATP1A1	P05023	P05023	Sodium/potassium-transporting ATPase subunit alpha-1 (Na(+)/K(+) ATPase alpha-1 subunit) (EC 3.6.3.9) (Sodium pump subunit alpha-1)	1				0.03
ATP6V1G1	O75348	O75348	V-type proton ATPase subunit G 1 (V-ATPase subunit G 1) (V-ATPase 13 kDa subunit 1) (Vacuolar proton pump subunit G 1) (Vacuolar proton pump subunit M16)	1				0.03
AZGP1	P25311	P25311	Zinc-alpha-2-glycoprotein (Zn-alpha-2-GP) (Zn-alpha-2-glycoprotein)	1				0.03
B2M	P61769	P61769	Beta-2-microglobulin [Cleaved into: Beta-2-microglobulin form pI 5.3]	1				0.03
CAP1	Q01518	Q01518	Adenylyl cyclase-associated protein 1 (CAP 1)	1				0.03
CEP164	Q9UPV0	Q9UPV0	Centrosomal protein of 164 kDa (Cep164)	1				0.03
COTL1	Q14019	Q14019	Coactosin-like protein	1				0.03
CRELD2	Q6UXH1	Q6UXH1	Cysteine-rich with EGF-like domain protein 2	1				0.03
CYBA	P13498	P13498	Cytochrome b-245 light chain (Cytochrome b(558) alpha chain) (Cytochrome b558 subunit alpha) (Neutrophil cytochrome b 22 kDa polypeptide) (Superoxide-generating NADPH oxidase light chain subunit) (p22 phagocyte B-cytochrome) (p22-phox) (p22phox)	1				0.03
DNAH6	Q9C0G6	Q9C0G6	Dynein heavy chain 6, axonemal (Axonemal beta dynein heavy chain 6) (Ciliary dynein heavy chain 6)	1				0.03
DNAJB11	Q9UBS4	Q9UBS4	DnaJ homolog subfamily B member 11 (APOBEC1-binding protein 2) (ABBP-2) (DnaJ protein homolog 9) (ER-associated DNAJ) (ER-associated Hsp40 co-chaperone) (Endoplasmic reticulum DNA J domain-containing protein 3) (ER-resident protein ERdj3) (ERdj3) (ERj3p) (HEDJ) (Human DnaJ protein 9) (hDj-9) (PWP1-interacting protein 4)	1				0.03
DNAJC3	Q13217	Q13217	DnaJ homolog subfamily C member 3 (Endoplasmic reticulum DNA J domain-containing protein 6) (ER-resident protein ERdj6) (ERdj6) (Interferon-induced, double-stranded RNA-activated protein kinase inhibitor) (Protein kinase inhibitor of 58 kDa) (Protein kinase inhibitor p58)	1				0.03
DSC1	Q08554	Q08554	Desmocollin-1 (Cadherin family member 1) (Desmosomal glycoprotein 2/3) (DG2/DG3)	1				0.03
EFHD2	Q96C19	Q96C19	EF-hand domain-containing protein D2 (Swiprosin-1)	1				0.03
ELOVL1	Q9BW60	Q9BW60	Elongation of very long chain fatty acids protein 1 (EC 2.3.1.199) (3-keto acyl-CoA synthase ELOVL1) (ELOVL fatty acid elongase 1) (ELOVL FA elongase 1) (Very long chain 3-ketoacyl-CoA synthase 1) (Very long chain 3-oxoacyl-CoA synthase 1)	1				0.03
EPS8	Q12929	Q12929	Epidermal growth factor receptor kinase substrate 8	1				0.03
ERLIN1	O75477	O75477	Erlin-1 (Endoplasmic reticulum lipid raft-associated protein 1) (Protein KE04) (Stomatin-prohibitin-flotillin-HflC/K domain-containing protein 1) (SPFH domain-containing protein 1)	1				0.03
FAM91A1	Q658Y4	Q658Y4	Protein FAM91A1	1				0.03
FOLR1	P15328	P15328	Folate receptor alpha (FR-alpha) (Adult folate-binding protein) (FBP) (Folate receptor 1) (Folate receptor, adult) (KB cells FBP) (Ovarian tumor-associated antigen MOv18)	1				0.03
GDA	Q9Y2T3	Q9Y2T3	Guanine deaminase (Guanase) (Guanine aminase) (EC 3.5.4.3) (Guanine aminohydrolase) (GAH) (p51-nedasin)	1				0.03
GDI2	P50395	P50395	Rab GDP dissociation inhibitor beta (Rab GDI beta) (Guanosine diphosphate dissociation inhibitor 2) (GDI-2)	1				0.03
GNAS	Q5JWF2	Q5JWF2	Guanine nucleotide-binding protein G(s) subunit alpha isoforms XLas (Adenylate cyclase-stimulating G alpha protein) (Extra large alphas protein) (XLalphas)	1				0.03
ITGA2	P17301	P17301	Integrin alpha-2 (CD49 antigen-like family member B) (Collagen receptor) (Platelet membrane glycoprotein Ia) (GPIa) (VLA-2 subunit alpha) (CD antigen CD49b)	1				0.03
ITPR3	Q14573	Q14573	Inositol 1,4,5-trisphosphate receptor type 3 (IP3 receptor isoform 3) (IP3R 3) (InsP3R3) (Type 3 inositol 1,4,5-trisphosphate receptor) (Type 3 InsP3 receptor)	1				0.03
LDLR	P01130	P01130	Low-density lipoprotein receptor (LDL receptor)	1				0.03
LEPREL1	Q8IVL5	Q8IVL5	Prolyl 3-hydroxylase 2 (EC 1.14.11.7) (Leprecan-like protein 1) (Myxoid liposarcoma-associated protein 4)	1				0.03
LRPAP1	P30533	P30533	Alpha-2-macroglobulin receptor-associated protein (Alpha-2-MRAP) (Low density lipoprotein receptor-related protein-associated protein 1) (RAP)	1				0.03
MLKL	Q8NB16	Q8NB16	Mixed lineage kinase domain-like protein (hMLKL)	1				0.03
N4BP3	O15049	O15049	NEDD4-binding protein 3 (N4BP3)	1				0.03
NCSTN	Q92542	Q92542	Nicastrin	1				0.03
PIGU	Q9H490	Q9H490	Phosphatidylinositol glycan anchor biosynthesis class U protein (Cell division cycle protein 91-like 1) (Protein CDC91-like 1) (GPI transamidase component PIG-U)	1				0.03
PRAMEF20	Q5VT98	Q5VT98	PRAME family member 20	1				0.03
PSMB7	Q99436	Q99436	Proteasome subunit beta type-7 (EC 3.4.25.1) (Macropain chain Z) (Multicatalytic endopeptidase complex chain Z) (Proteasome subunit Z)	1				0.03
PTGES	O14684	O14684	Prostaglandin E synthase (EC 5.3.99.3) (Microsomal glutathione S-transferase 1-like 1) (MGST1-L1) (Microsomal prostaglandin E synthase 1) (MPGES-1) (p53-induced gene 12 protein)	1				0.03
PTGES3	Q15185	Q15185	Prostaglandin E synthase 3 (EC 5.3.99.3) (Cytosolic prostaglandin E2 synthase) (cPGES) (Hsp90 co-chaperone) (Progesterone receptor complex p23) (Telomerase-binding protein p23)	1				0.03
PTPLAD1	Q9P035	Q9P035	Very-long-chain (3R)-3-hydroxyacyl-CoA dehydratase 3 (EC 4.2.1.134) (3-hydroxyacyl-CoA dehydratase 3) (HACD3) (Butyrate-induced protein 1) (B-ind1) (hB-ind1) (Protein-tyrosine phosphatase-like A domain-containing protein 1)	1				0.03
RAB13	P51153	P51153	Ras-related protein Rab-13 (Cell growth-inhibiting gene 4 protein)	1				0.03
S100A9	P06702	P06702	Protein S100-A9 (Calgranulin-B) (Calprotectin L1H subunit) (Leukocyte L1 complex heavy chain) (Migration inhibitory factor-related protein 14) (MRP-14) (p14) (S100 calcium-binding protein A9)	1				0.03
SDF2	Q99470	Q99470	Stromal cell-derived factor 2 (SDF-2)	1				0.03
SERPINB5	P36952	P36952	Serpin B5 (Maspin) (Peptidase inhibitor 5) (PI-5)	1				0.03
SH3TC1	Q8TE82	Q8TE82	SH3 domain and tetratricopeptide repeat-containing protein 1	1				0.03
SLC16A3	O15427	O15427	Monocarboxylate transporter 4 (MCT 4) (Solute carrier family 16 member 3)	1				0.03
SLC7A5	Q01650	Q01650	Large neutral amino acids transporter small subunit 1 (4F2 light chain) (4F2 LC) (4F2LC) (CD98 light chain) (Integral membrane protein E16) (L-type amino acid transporter 1) (hLAT1) (Solute carrier family 7 member 5) (y+ system cationic amino acid transporter)	1				0.03
SNX4	O95219	O95219	Sorting nexin-4	1				0.03
SPCS3	P61009	P61009	Signal peptidase complex subunit 3 (EC 3.4.-.-) (Microsomal signal peptidase 22/23 kDa subunit) (SPC22/23) (SPase 22/23 kDa subunit)	1				0.03
STX4	Q12846	Q12846	Syntaxin-4 (Renal carcinoma antigen NY-REN-31)	1				0.03
TMEM33	P57088	P57088	Transmembrane protein 33 (Protein DB83) (SHINC-3)	1				0.03
ACTR2	P61160	P61160	Actin-related protein 2 (Actin-like protein 2)	1				0.04
ARPC2	O15144	O15144	Actin-related protein 2/3 complex subunit 2 (Arp2/3 complex 34 kDa subunit) (p34-ARC)	1				0.04
EIF5B	O60841	O60841	Eukaryotic translation initiation factor 5B (eIF-5B) (EC 3.6.5.3) (Translation initiation factor IF-2)	1				0.04
LPCAT3	Q6P1A2	Q6P1A2	Lysophospholipid acyltransferase 5 (LPLAT 5) (EC 2.3.1.-) (1-acylglycerophosphocholine O-acyltransferase) (EC 2.3.1.23) (1-acylglycerophosphoserine O-acyltransferase) (EC 2.3.1.n6) (Lysophosphatidylcholine acyltransferase) (LPCAT) (Lyso-PC acyltransferase) (Lysophosphatidylcholine acyltransferase 3) (Lyso-PC acyltransferase 3) (Lysophosphatidylserine acyltransferase) (LPSAT) (Lyso-PS acyltransfer…	1				0.04
NACA	Q13765	Q13765	Nascent polypeptide-associated complex subunit alpha (NAC-alpha) (Alpha-NAC) (allergen Hom s 2)	1				0.04
PSMD2	Q13200	Q13200	26S proteasome non-ATPase regulatory subunit 2 (26S proteasome regulatory subunit RPN1) (26S proteasome regulatory subunit S2) (26S proteasome subunit p97) (Protein 55.11) (Tumor necrosis factor type 1 receptor-associated protein 2)	1				0.04
SDF4	Q9BRK5	Q9BRK5	45 kDa calcium-binding protein (Cab45) (Stromal cell-derived factor 4) (SDF-4)	1				0.04
TMED4	Q7Z7H5	Q7Z7H5	Transmembrane emp24 domain-containing protein 4 (Endoplasmic reticulum stress-response protein 25) (ERS25) (GMP25iso) (Putative NF-kappa-B-activating protein 156) (p24 family protein alpha-3) (p24alpha3)	1				0.04
UBE2N	P61088	P61088	Ubiquitin-conjugating enzyme E2 N (EC 2.3.2.23) (Bendless-like ubiquitin-conjugating enzyme) (E2 ubiquitin-conjugating enzyme N) (Ubc13) (UbcH13) (Ubiquitin carrier protein N) (Ubiquitin-protein ligase N)	1				0.05

## Sheet: Proteomics (Chlamydia)
Protein Name	Protein_iD	Gene Name	CT	CTL	PNNL FASTA Protein Description	Inc?	Total Peptide Count	8 hr p value	16 hr p value	24 hr p value
gi|166154156|ref|YP_001654274.1|	YP_001654274.1|	InaC	CT813	CTL0184	inclusion membrane protein [Chlamydia trachomatis 434/Bu]; Duplicate proteins: gi|497559241|ref|WP_009873425.1|	Yes	13	0.457566	0.224193	0.00571459
gi|166154336|ref|YP_001654454.1|	YP_001654454.1|	IncD	CT115	CTL0370	inclusion membrane protein D [Chlamydia trachomatis 434/Bu]; Duplicate proteins: gi|501220581|ref|WP_012263599.1|	Yes	2	1	1	0.022871
gi|166154337|ref|YP_001654455.1|	YP_001654455.1|	IncE	CT116	CTL0371	inclusion membrane protein E [Chlamydia trachomatis 434/Bu]; Duplicate proteins: gi|497559387|ref|WP_009873571.1|	Yes	2	1	0.00571459	4.52945e-05
gi|166154339|ref|YP_001654457.1|	YP_001654457.1|	IncG	CT118	CTL0373	inclusion membrane protein G [Chlamydia trachomatis 434/Bu]; Duplicate proteins: gi|497559389|ref|WP_009873573.1|	Yes	5	1	4.52945e-05	4.52945e-05
gi|166154340|ref|YP_001654458.1|	YP_001654458.1|	IncA	CT119	CTL0374	inclusion membrane protein A [Chlamydia trachomatis 434/Bu]; Duplicate proteins: gi|501220753|ref|WP_012263771.1|	Yes	6	1	0.224193	4.52945e-05
gi|166154434|ref|YP_001654552.1|	YP_001654552.1|		CT223	CTL0476	inclusion membrane protein [Chlamydia trachomatis 434/Bu]; Duplicate proteins: gi|497559468|ref|WP_009873652.1|	Yes	2	1	4.52945e-05	4.52945e-05
gi|166154439|ref|YP_001654557.1|	YP_001654557.1|		CT228	CTL0480	inclusion membrane protein [Chlamydia trachomatis 434/Bu]; Duplicate proteins: gi|497559472|ref|WP_009873656.1|	Yes	4	1	0.224193	4.52945e-05
gi|166154440|ref|YP_001654558.1|	YP_001654558.1|		CT229	CTL0481	inclusion membrane protein [Chlamydia trachomatis 434/Bu]; Duplicate proteins: gi|497559473|ref|WP_009873657.1|	Yes	1	1	1	0.000964813
gi|166154443|ref|YP_001654561.1|	YP_001654561.1|	IncB	CT232	CTL0484	inclusion membrane protein B [Chlamydia trachomatis 434/Bu]; Duplicate proteins: gi|501220756|ref|WP_012263774.1|	Yes	1	1	0.224193	0.000964813
gi|166154460|ref|YP_001654578.1|	YP_001654578.1|		CT249	CTL0500A	hypothetical protein CTL0500A [Chlamydia trachomatis 434/Bu]; Duplicate proteins: gi|497559487|ref|WP_009873671.1|	Yes	1	1	0.224193	0.000964813
gi|532524926|ref|YP_008470966.1|	YP_008470966.1|		CT358	CTL0612	hypothetical protein CTL0612 [Chlamydia trachomatis 434/Bu]; Duplicate proteins: gi|497559567|ref|WP_009873751.1|	Yes	1	0.224193	0.212864	0.000964813
gi|166154105|ref|YP_001654223.1|	YP_001654223.1|		CT763	CTL0132	hypothetical protein CTL0132 [Chlamydia trachomatis 434/Bu]; Duplicate proteins: gi|497559204|ref|WP_009873388.1|	No	2	1	4.52945e-05	4.52945e-05
gi|166154607|ref|YP_001654725.1|	YP_001654725.1|	DnaK	CT396	CTL0652	chaperone protein DnaK [Chlamydia trachomatis 434/Bu]; Duplicate proteins: gi|497558442|ref|WP_009872626.1|	No	1	1	0.022871	0.224193
gi|166154618|ref|YP_001654736.1|	YP_001654736.1|	dksA	CT407	CTL0664	RNA polymerase-binding transcription factor [Chlamydia trachomatis 434/Bu]; Duplicate proteins: gi|497557575|ref|WP_009871759.1|,gi|15605132|ref|NP_219917.1|	No	2	1	0.000964813	0.0747595
gi|166154825|ref|YP_001654943.1|	YP_001654943.1|	CADD	CT610	CTL0874	virulence protein CADD [Chlamydia trachomatis 434/Bu]; Duplicate proteins: gi|497559758|ref|WP_009873942.1|	No	1	1	0.022871	1

## Sheet: Microscopy
Trivial Name	Uniprot_ID	Uniprot entry	Aeberhard	Mirrashidi	APEX	PMID	Pubmed link
14-3-3 epsilon	P62258	P62258	YES			25920978	25920978
14-3-3 eta	Q04917	Q04917	YES	YES	YES	25920978	25920978
14-3-3 gamma	P61981	P61981	YES	YES		25920978	25920978
14-3-3 theta	P27348	P27348	YES		YES	25920978	25920978
14-3-3 zeta/delta	P63104	P63104	YES		YES	25920978	25920978
14-3-3β	P31946	P31946	YES	YES	YES	11260479	11260479
ABCA1	O95477	O95477				22672264	22672264
ACBD6	Q9BR61	Q9BR61				22590624	22590624
ACSL3	O95573	O95573	YES			22590624	22590624
Actin	P60709	P60709				18692775	18692775
ADD1	P35611	P35611				19047752	19047752
ApoA1	P02647	P02647				22672264	22672264
Arf1	P84077	P84077		YES		20231409	20231409
Arf4	P18085	P18085				25920978	25920978
Arf5	P84085	P84085				25920978	25920978
BAD	Q92934	Q92934				16710454	16710454
Beta-catenin	P35222	P35222				11953402	11953402
BICD1	Q96G01	Q96G01				17101644	17101644
Calnexin	P27824	P27824	YES		YES	18832043	18832043
Calreticulin	P27797	P27797	YES		YES	9841902	9841902
CAV1	Q03135	Q03135			YES	11399051	11399051
CD59	P13987	P13987	YES			19168743	19168743
CD63	P08962	P08962			YES	16410552	16410552
CEP170	Q5SW79	Q5SW79		YES	YES	26220855	26220855
CERT	Q9Y5P4	Q9Y5P4	YES	YES		21731489	21731489
CLA1	Q8WTV0	Q8WTV0				22672264	22672264
COG3	Q96JB2	Q96JB2				22233276	22233276
COG8	Q96MW5	Q96MW5				22233276	22233276
Crk-I/II	P46108	P46108				24586162	24586162
CrkL	P46109	P46109				28744480	28744480
Cytokeratin 18	P05783	P05783	YES			18692775	18692775
Derlin-1	Q9BUN8	Q9BUN8				22901061	22901061
DHCR7	Q9UBM7	Q9UBM7	YES			26042774	26042774
DP-1 (REEP5)	Q00765	Q00765	YES			22901061	22901061
EGFR	P00533	P00533	YES	YES	YES	25471819	25471819
EphA2	P29317	P29317	YES			25906164	25906164
FIS1	Q9Y3D6	Q9Y3D6	YES			26042774	26042774
FLII	Q13045	Q13045	YES	YES		26042774	26042774
Fyn	P06241	P06241				20331642	20331642
GBF1	Q92538	Q92538				21909260	21909260
GM130	Q08379	Q08379			YES	19060882	19060882
GRP78	P11021	P11021	YES		YES	18832043	18832043
GS15	Q9NYM9	Q9NYM9				22233276	22233276
HSP7C	P11142	P11142	YES		YES	26042774	26042774
HSPB1	P04792	P04792	YES		YES	26042774	26042774
ILK	Q13418	Q13418	YES			26042774	26042774
Keratin 8	P05787	P05787			YES	18692775	18692775
LEG1	P09382	P09382			YES	29891717	29891717
LPCAT1	Q8NF37	Q8NF37	YES			22590624	22590624
MAP1-LC3	Q9H492	Q9H492				21464618	21464618
Mcl-1	Q07820	Q07820				28347402	28347402
MLC2	P10916	P10916				23727243	23727243
MLCK	Q15746	Q15746				23727243	23727243
MyD88	Q99836	Q99836				16293622	16293622
Myosin IIA (MYH9)	P35579	P35579			YES	23727243	23727243
Myosin IIB (MYH10)	P35580	P35580				23727243	23727243
MYPT1	O14974	O14974	YES	YES	YES	23727243	23727243
OCRL1	Q01968	Q01968				20231409	20231409
OSBP	P22059	P22059				20231409	20231409
PDI	P07237	P07237	YES	YES	YES	19343202	19343202
PDIA3 (ERP57)	P30101	P30101	YES		YES	18832043	18832043
PI4KIIα	Q9BTU6	Q9BTU6				20231409	20231409
PIK3R1	P27986	P27986				28744480	28744480
PIK3R2	O00459	O00459	YES			28744480	28744480
PK3CA	P42336	P42336				28744480	28744480
PK3CB	P42338	P42338				28744480	28744480
PKCδ	Q05655	Q05655	YES			15863503	15863503
Rab11A	P62491	P62491		YES		14500507	14500507
Rab11B	Q15907	Q15907	YES			14500507	14500507
RAB11FIP2	Q7L804	Q7L804		YES		23006599	23006599
Rab14	P61106	P61106	YES			22046472	22046472
Rab1A	P62820	P62820		YES		14500507	14500507
Rab25	P57735	P57735				26962046	26962046
Rab34	Q9BZG1	Q9BZG1				26163492	26163492
Rab35	Q15286	Q15286	YES	YES		26042774	26042774
Rab39A	Q14964	Q14964				26163492	26163492
Rab3D	O95716	O95716	YES			26042774	26042774
Rab4A	P20338	P20338				14500507	14500507
Rab4B	P61018	P61018				14500507	14500507
Rab6A	P20340	P20340	YES			14500507	14500507
Rab6B	Q9NRW1	Q9NRW1				14500507	14500507
Rac1	P63000	P63000	YES	YES		26042774	26042774
Raf1	P04049	P04049				22046472	22046472
RhoA	P61586	P61586				18692775	18692775
RTN4	Q9NQC3	Q9NQC3	YES	YES	YES	22901061	22901061
SEC22B	O75396	O75396	YES			26042774	26042774
Sec61b	P60468	P60468			YES	29078338	29078338
SERCA2/ATPA2	P16615	P16615	YES			9841902	9841902
SMS1	Q86VZ5	Q86VZ5				21909260	21909260
SMS2	Q8NHU3	Q8NHU3				21909260	21909260
SMVT	Q9Y289	Q9Y289				23029384	23029384
SNX1	Q13596	Q13596	YES	YES	YES	26042774	26042774
SNX2	O60749	O60749	YES	YES		26042774	26042774
SNX5	Q9Y5X3	Q9Y5X3	YES	YES	NS	26042774	26042774
SNX6	Q9UNH7	Q9UNH7	YES	YES		26042774	26042774
SORT1	Q99523	Q99523				26962046	26962046
Src	P12931	P12931				20331642	20331642
STARD3	Q14849	Q14849				16410552	16410552
STIM1	Q13586	Q13586	YES		YES	25915399	25915399
STIM2	Q9P246	Q9P246	YES			26042774	26042774
SYNGR2	O43760	O43760	YES			26042774	26042774
Syntaxin 10	O60499	O60499				26442221	26442221
Syntaxin 6	O43752	O43752				21109560	21109560
Syntaxin 7	O15400	O15400	YES	YES	YES	26042774	26042774
TERA	P55072	P55072	YES			26042774	26042774
TFR1	P02786	P02786	YES		YES	14500507	14500507
TLR2	O60603	O60603				16293622	16293622
TLR4	O00206	O00206				16293622	16293622
UBXN6	Q9BZV1	Q9BZV1	YES			26042774	26042774
VAMP3	Q15836	Q15836	YES			18369472	18369472
VAMP4	O75379	O75379				18369472	18369472
VAMP7	P51809	P51809				18369472	18369472
VAMP8	Q9BV40	Q9BV40	YES			18369472	18369472
VAPA	Q9P0L0	Q9P0L0	YES	YES	YES	21731489	21731489
VAPB	O95292	O95292	YES	YES	YES	21731489	21731489
Vimentin	P08670	P08670			YES	18692775	18692775
YTHD2	Q9Y5A9	Q9Y5A9	YES		YES	26042774	26042774
ZNF23	P17027	P17027				22590624	22590624

## Sheet: Column legend
Proteomics (Human)
Protein	Short protein name
Uniprot_ID	Uniprot identifier
Uniprot entry	Link to uniprot website entry for protein
Protein names	Full protein name
Found#	Number of mass spectrometry studies that identified this protein (out of this study, Aeberhard, and Mirrashidi)
APEX 8 hr P value	P value from this study
APEX 16 hr P value	P value from this study
APEX 24 hr P value	P value from this study
Aeberhard P value (0 = p < 0.01)	P value for protein from Aeberhard paper
Mirrashidi MIST.score (1 = perfect score)	Scoring system for protein-protein interaction data, data from Mirrashidi paper
Mirrashidi Bait(Inc)	Inclusion membrane protein in Mirrashidi paper that pulled down listed protein
Microscopy (PMID)	Pubmed ID of publications that examined protein by immunofluorescence in the context of Chlamydia infection
Proteomics (Chlamydia)
Protein Name
Protein_iD
Gene Name
CT	Gene number, C. trachomatis serovar D numbering
CTL	Gene number, C. trachomatis serovar L2 numbering
PNNL FASTA Protein Description	Full annotation name
Inc?	Yes indicates it is a known Inc
Total Peptide Count	Number of unique peptides identified
8 hr p value	P value from this study
16 hr p value	P value from this study
24 hr p value	P value from this study
Microscopy
Trivial Name
Uniprot_ID
Uniprot entry	Link to uniprot entry
Aeberhard	Yes means protein was identified in this proteomics data set
Mirrashidi	Yes means protein was identified in this proteomics data set
APEX	Yes means protein was identified in this proteomics data set, NS means found but was not significant.
PMID	Pubmed ID
Pubmed link	Link to pubmed publication entry
